# Supplementary material for: Construction of cyclopentane-fused coumarins via DBU-catalyzed [3+2] cycloaddition of 3-homoacyl coumarins with cyclic 1-azadienes
Source: Royal Society of Chemistry journal article supplement (doi:10.1039/d1ra03387e), 2021-01-01
Supplement: d1ra03387e1.pdf [file d1ra03387e1.pdf]

# Construction of Cyclopentane-fused Coumarins via DBU-Catalyzed [3 + 2] Cycloaddition of 3-homoacyl Coumarins with Cyclic 1-azadienes

Huawei Lin,<sup>a</sup> Huimin Yang,<sup>a</sup> Qi Gong,<sup>a</sup> Shan Luo,<sup>a</sup> Jing Gu,<sup>a</sup> Xiaoqun Cao,<sup>a</sup> Biming Mao,<sup>\*b</sup> Yanqing Ge<sup>\*a</sup> and Chunhao Yuan<sup>\*a</sup>

<sup>a</sup>*School of Chemistry and Pharmaceutical Engineering, Shandong First Medical University & Shandong Academy of Medical Sciences, Taian 271016, Shandong, P. R. China. E-mail: yuanchunhao2017@163.com, geyanqing2016@126.com*

<sup>b</sup>*Institute of Materia Medica, Shandong First Medical University & Shandong Academy of Medical Sciences, Jinan 250117, Shandong, P. R. China. E-mail: maobiming@sdfmu.edu.cn*

## Contents

|                                                                                                 |         |
|-------------------------------------------------------------------------------------------------|---------|
| General Information                                                                             | S2      |
| Preparation of Cyclic 1-azadienes <b>1</b> and <b>4</b>                                         | S2      |
| Preparation of 3-homoacyl Coumarins <b>2</b>                                                    | S2      |
| General Procedure for the [3+2] Cycloaddition Reaction                                          | S2      |
| Screening of Enantioselective Reaction Conditions                                               | S3–S5   |
| Analytic and Characterization Data for the Products <b>3</b> , <b>5</b> and <b>6</b>            | S5–S21  |
| References                                                                                      | S22     |
| <sup>1</sup> H and <sup>13</sup> C NMR Spectra of All Products <b>3</b> , <b>5</b> and <b>6</b> | S23–S53 |
| X-Ray Crystallographic Data of <b>3aj</b>                                                       | S54–S63 |

## General Information

All reactions were performed under N<sub>2</sub> atmospheres in oven-dried glassware with magnetic stirring. Unless otherwise stated, all reagents were purchased from commercial suppliers. Organic solutions were concentrated under reduced pressure on a rotary evaporator. Reactions were monitored through thin layer chromatography (TLC) on silica gel–precoated glass plates. Chromatograms were visualized by fluorescence quenching with UV light at 254 nm. Flash column chromatography was performed using Qingdao Haiyang flash silica gel (200–300 mesh). <sup>1</sup>H and <sup>13</sup>C NMR spectra were recorded in CDCl<sub>3</sub> using a 400 MHz NMR instrument (referenced internally to Me<sub>4</sub>Si). <sup>1</sup>H NMR data are reported as follows: chemical shift, multiplicity (s = singlet; d = doublet; q = quartet; m = multiplet; br = broad), coupling constant (Hz), and integral. Data for <sup>13</sup>C NMR spectra are reported in terms of chemical shift. Accurate mass measurements were performed using an Agilent instrument with the ESI-MS technique. Melting points were determined on a Stuart SMP3 melting apparatus. X-ray crystallographic data were collected using a Bruker APEX-II CCD.

### General procedure for preparation of cyclic 1-azadienes **1**<sup>1</sup> and **4**<sup>1a</sup>

Cyclic 1-azadienes **1** and **4** were prepared by the reported procedure.

### General procedure for preparation of 3-homoacyl coumarins **2**<sup>2</sup>

3-homoacyl coumarins **2** were prepared by the reported procedure.

### General Procedure for the [3+2] Cycloaddition Reaction of Cyclic 1-azadienes **1** or **4** with 3-homoacyl Coumarins **2**

Under a nitrogen atmosphere, cyclic 1-azadiene **1** or **4** (0.1 mmol), 3-homoacyl coumarins **2** (0.12 mmol) and 20 mol% DBU were mixed in THF (2 mL). Then the reaction mixture was vigorously stirred at room temperature and monitored by TLC. After completion, the reaction mixture was concentrated under reduced pressure and the mixture was purified by column chromatography on silica gel (PE/CH<sub>2</sub>Cl<sub>2</sub> = 1:2) to give the corresponding product **3** or **5**.

**Table S1.** Screening of enantioselective reaction conditions<sup>a</sup>

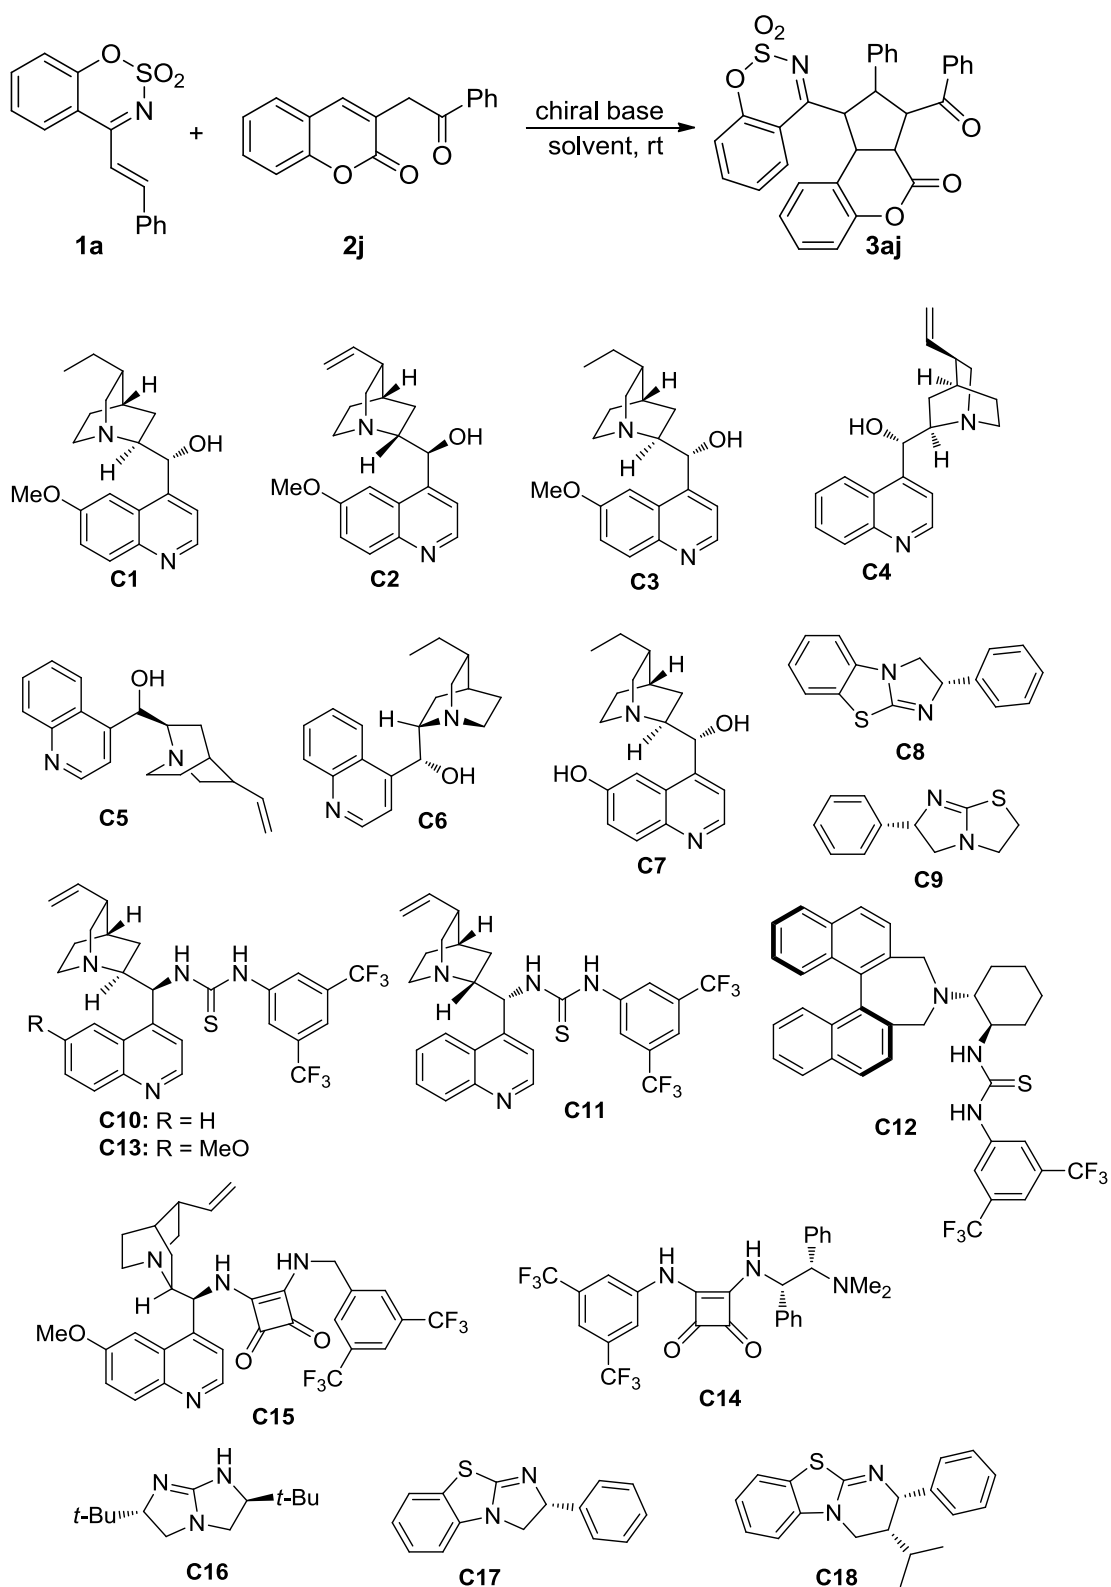

| Entry | Catalyst  | Solvent                         | Time(h) | Yield <sup>b</sup> (%) | dr <sup>c</sup> | ee <sup>c</sup> (%) |
|-------|-----------|---------------------------------|---------|------------------------|-----------------|---------------------|
| 1     | <b>C1</b> | CH <sub>2</sub> Cl <sub>2</sub> | 120     | 0                      | -               | -                   |
| 2     | <b>C2</b> | CH <sub>2</sub> Cl <sub>2</sub> | 120     | 0                      | -               | -                   |
| 3     | <b>C3</b> | CH <sub>2</sub> Cl <sub>2</sub> | 120     | 0                      | -               | -                   |

|    |            |                                 |     |      |       |      |
|----|------------|---------------------------------|-----|------|-------|------|
| 4  | <b>C4</b>  | CH <sub>2</sub> Cl <sub>2</sub> | 120 | 0    | -     | -    |
| 5  | <b>C5</b>  | CH <sub>2</sub> Cl <sub>2</sub> | 120 | 0    | -     | -    |
| 6  | <b>C6</b>  | CH <sub>2</sub> Cl <sub>2</sub> | 120 | 0    | -     | -    |
| 7  | <b>C7</b>  | CH <sub>2</sub> Cl <sub>2</sub> | 120 | 0    | -     | -    |
| 8  | <b>C8</b>  | CH <sub>2</sub> Cl <sub>2</sub> | 120 | 0    | -     | -    |
| 9  | <b>C9</b>  | CH <sub>2</sub> Cl <sub>2</sub> | 120 | 0    | -     | -    |
| 10 | <b>C10</b> | CH <sub>2</sub> Cl <sub>2</sub> | 120 | 0    | -     | -    |
| 11 | <b>C11</b> | CH <sub>2</sub> Cl <sub>2</sub> | 120 | 0    | -     | -    |
| 12 | <b>C12</b> | CH <sub>2</sub> Cl <sub>2</sub> | 120 | 0    | -     | -    |
| 13 | <b>C13</b> | CH <sub>2</sub> Cl <sub>2</sub> | 120 | 0    | -     | -    |
| 14 | <b>C14</b> | CH <sub>2</sub> Cl <sub>2</sub> | 120 | 0    | -     | -    |
| 15 | <b>C15</b> | CH <sub>2</sub> Cl <sub>2</sub> | 120 | 0    | -     | -    |
| 16 | <b>C16</b> | CH <sub>2</sub> Cl <sub>2</sub> | 120 | 0    | -     | -    |
| 17 | <b>C17</b> | CH <sub>2</sub> Cl <sub>2</sub> | 120 | 0    | -     | -    |
| 18 | <b>C18</b> | CH <sub>2</sub> Cl <sub>2</sub> | 120 | 0    | -     | -    |
| 19 | <b>C1</b>  | THF                             | 120 | 0    | -     | -    |
| 20 | <b>C2</b>  | THF                             | 120 | 0    | -     | -    |
| 21 | <b>C3</b>  | THF                             | 120 | 0    | -     | -    |
| 22 | <b>C4</b>  | THF                             | 120 | 0    | -     | -    |
| 23 | <b>C5</b>  | THF                             | 120 | 0    | -     | -    |
| 24 | <b>C6</b>  | THF                             | 120 | 0    | -     | -    |
| 25 | <b>C7</b>  | THF                             | 120 | 0    | -     | -    |
| 26 | <b>C8</b>  | THF                             | 120 | 0    | -     | -    |
| 27 | <b>C9</b>  | THF                             | 120 | 0    | -     | -    |
| 28 | <b>C10</b> | THF                             | 120 | 0    | -     | -    |
| 29 | <b>C11</b> | THF                             | 120 | 0    | -     | -    |
| 30 | <b>C12</b> | THF                             | 120 | 0    | -     | -    |
| 31 | <b>C13</b> | THF                             | 120 | 0    | -     | -    |
| 32 | <b>C14</b> | THF                             | 120 | 0    | -     | -    |
| 33 | <b>C15</b> | THF                             | 120 | 0    | -     | -    |
| 34 | <b>C16</b> | THF                             | 120 | 0    | -     | -    |
| 35 | <b>C17</b> | THF                             | 120 | 0    | -     | -    |
| 36 | <b>C18</b> | THF                             | 120 | 0    | -     | -    |
| 37 | <b>C1</b>  | CH <sub>3</sub> CN              | 120 | 46   | >20:1 | 27.3 |
| 38 | <b>C2</b>  | CH <sub>3</sub> CN              | 120 | 52.4 | >20:1 | 9.5  |
| 39 | <b>C3</b>  | CH <sub>3</sub> CN              | 120 | 60   | >20:1 | 8    |
| 40 | <b>C4</b>  | CH <sub>3</sub> CN              | 120 | 31   | >20:1 | 0    |
| 41 | <b>C5</b>  | CH <sub>3</sub> CN              | 120 | 46   | >20:1 | 4    |
| 42 | <b>C6</b>  | CH <sub>3</sub> CN              | 120 | 0    | -     | -    |
| 43 | <b>C7</b>  | CH <sub>3</sub> CN              | 120 | 0    | -     | -    |
| 44 | <b>C8</b>  | CH <sub>3</sub> CN              | 120 | 0    | -     | -    |
| 45 | <b>C9</b>  | CH <sub>3</sub> CN              | 120 | 31   | >20:1 | 4.5  |
| 46 | <b>C10</b> | CH <sub>3</sub> CN              | 120 | 0    | -     | -    |
| 47 | <b>C11</b> | CH <sub>3</sub> CN              | 120 | 41   | >20:1 | 2    |

|    |            |                    |     |    |       |    |
|----|------------|--------------------|-----|----|-------|----|
| 48 | <b>C12</b> | CH <sub>3</sub> CN | 120 | 0  | -     | -  |
| 49 | <b>C13</b> | CH <sub>3</sub> CN | 120 | 0  | -     | -  |
| 50 | <b>C14</b> | CH <sub>3</sub> CN | 120 | 0  | -     | -  |
| 51 | <b>C15</b> | CH <sub>3</sub> CN | 120 | 0  | -     | -  |
| 52 | <b>C16</b> | CH <sub>3</sub> CN | 120 | 73 | >20:1 | 11 |
| 53 | <b>C17</b> | CH <sub>3</sub> CN | 120 | 0  | -     | -  |
| 54 | <b>C18</b> | CH <sub>3</sub> CN | 120 | 36 | >20:1 | 11 |

<sup>a</sup> Reactions were carried out with **1a** (0.1 mmol), **2j** (0.12mmol), and 20 mol% catalyst in 2 mL of CH<sub>3</sub>CN at rt. <sup>b</sup> Isolated yields. <sup>c</sup> Determined by <sup>1</sup>H NMR. <sup>d</sup> Determined by HPLC analysis.

### Characterization Data for the [3+2] Cycloaddition Reaction Products **3** and **5**.

#### 3-benzoyl-8-bromo-1-(2,2-dioxidobenzo[*e*][1,2,3]oxathiazin-4-yl)-2-phenyl-1,3,3a,9b-tetrahydrocyclopenta[*c*]chromen-4(2*H*)-one (**3aa**)

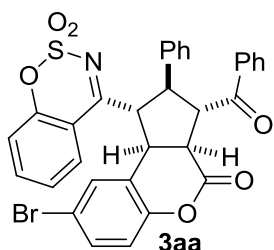

Orange solid (86%, 54.0mg), mp = 228 – 230 °C. <sup>1</sup>H NMR (400 MHz, CDCl<sub>3</sub>) δ 7.73 (d, *J* = 7.9 Hz, 2H), 7.49 – 7.34 (m, 2H), 7.31 – 7.19 (m, 4H), 7.17 – 7.01 (m, 6H), 6.91 (d, *J* = 8.7 Hz, 1H), 6.71 (t, *J* = 7.7 Hz, 1H), 6.54 (d, *J* = 8.1 Hz, 1H), 5.02 (d, *J* = 6.9 Hz, 1H), 4.11 (dd, *J* = 11.8, 7.7 Hz, 1H), 3.81 (dd, *J* = 10.9, 7.1 Hz, 2H), 3.62 (t, *J* = 11.1 Hz, 1H). <sup>13</sup>C NMR (101 MHz, CDCl<sub>3</sub>) δ 196.5, 177.2, 167.9, 152.4, 148.7, 138.4, 136.3, 133.5, 132.9, 131.6, 130.8, 128.4, 128.3, 127.6, 127.0, 126.9, 126.7, 124.2, 121.3, 117.8, 117.6, 116.7, 115.4, 57.9, 54.2, 54.0, 44.2, 44.1. HRMS (ESI) calcd for C<sub>32</sub>H<sub>22</sub>BrNO<sub>6</sub>SNa<sup>+</sup> [M+Na]<sup>+</sup> 650.0243, found 650.0242.

#### 3-benzoyl-8-bromo-1-(2,2-dioxidobenzo[*e*][1,2,3]oxathiazin-4-yl)-2-(2-fluorophenyl)-1,3,3a,9b-tetrahydrocyclopenta[*c*]chromen-4(2*H*)-one (**3ba**)

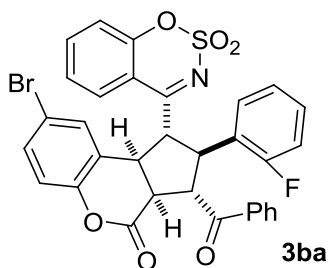

Yellow solid (85%, 54.9mg), mp = 193 – 195 °C. <sup>1</sup>H NMR (400 MHz, CDCl<sub>3</sub>) δ 7.80 (d, *J* = 7.9 Hz, 2H), 7.48 – 7.37 (m, 2H), 7.33 – 7.19 (m, 4H), 7.15 – 7.03 (m, 3H), 6.96 – 6.87 (m, 2H), 6.83 – 6.78 (m, 3H), 5.06 (d, *J* = 7.5 Hz, 1H), 4.15 – 4.01 (m, 2H), 3.94 (t, *J* = 11.2 Hz, 1H), 3.76 (d, *J* = 8.0 Hz, 1H). <sup>13</sup>C NMR (101 MHz, CDCl<sub>3</sub>) δ 196.5, 177.0, 167.5, 159.8 (d, *J* = 246.4 Hz), 152.5, 148.7, 136.4, 133.7, 132.9, 131.6, 130.9, 129.4 (d, *J* = 4.0 Hz), 128.9 (d, *J* = 8.5 Hz), 128.1, 127.7, 126.3, 124.8 (d, *J* = 12.3 Hz), 124.2, 124.2 (d, *J* = 3.2 Hz), 121.0, 117.9, 117.7, 116.6, 115.4, 115.1, 114.9, 54.7, 54.7, 52.9, 48.4, 44.0, 43.9. HRMS (ESI) calcd for C<sub>32</sub>H<sub>21</sub>BrFNO<sub>6</sub>SNa<sup>+</sup> [M+Na]<sup>+</sup> 668.0149, found 668.0148.

**3-benzoyl-8-bromo-1-(2,2-dioxidobenzo[*e*][1,2,3]oxathiazin-4-yl)-2-(3-fluorophenyl)-1,3,3a,9b-tetrahydrocyclopenta[*c*]chromen-4(2*H*)-one (3ca)**

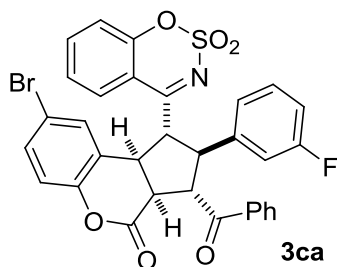

White solid (90%, 58.2mg), mp = 232 – 234 °C. <sup>1</sup>H NMR (400 MHz, CDCl<sub>3</sub>) δ 7.76 (d, *J* = 7.9 Hz, 2H), 7.50 – 7.41 (m, 2H), 7.28 (t, *J* = 7.3 Hz, 3H), 7.17 – 7.06 (m, 3H), 6.96 – 6.73 (m, 5H), 6.63 (d, *J* = 8.1 Hz, 1H), 4.99 (d, *J* = 7.0 Hz, 1H), 4.05 (dd, *J* = 11.7, 7.8 Hz, 1H), 3.91 (dd, *J* = 10.4, 7.1 Hz, 1H), 3.77 (d, *J* = 7.7 Hz, 1H), 3.62 (t, *J* = 11.2 Hz, 1H). <sup>13</sup>C NMR (101 MHz, CDCl<sub>3</sub>) δ 196.2, 176.9, 167.7, 162.1 (d, *J* = 248.0 Hz), 152.4, 148.6, 141.0 (d, *J* = 7.1 Hz), 136.6, 133.4, 133.0, 131.7, 130.8, 130.0 (d, *J* = 8.5 Hz), 128.2, 127.7, 126.5, 124.3, 122.8 (d, *J* = 2.8 Hz), 120.9, 118.0, 117.7, 116.7, 115.4, 114.1, 113.9 (d, *J* = 6.2 Hz), 113.6, 57.4, 53.7, 53.1, 44.4, 44.3. HRMS (ESI) calcd for C<sub>32</sub>H<sub>21</sub>BrFNO<sub>6</sub>SNa<sup>+</sup> [M+Na]<sup>+</sup> 668.0149, found 668.0148.

**3-benzoyl-8-bromo-1-(2,2-dioxidobenzo[*e*][1,2,3]oxathiazin-4-yl)-2-(4-fluorophenyl)-1,3,3a,9b-tetrahydrocyclopenta[*c*]chromen-4(2*H*)-one (3da)**

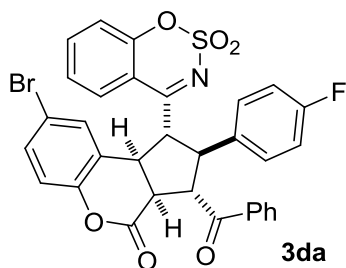

White solid (85%, 55.0mg), mp = 245 – 247 °C.  $^1\text{H}$  NMR (400 MHz,  $\text{CDCl}_3$ )  $\delta$  7.74 (d,  $J = 7.8$  Hz, 2H), 7.46 (t,  $J = 7.5$  Hz, 2H), 7.32 – 7.23 (m, 3H), 7.18 – 7.01 (m, 4H), 6.95 – 6.71 (m, 4H), 6.59 (d,  $J = 8.0$  Hz, 1H), 4.97 (d,  $J = 6.9$  Hz, 1H), 4.05 (dd,  $J = 11.7, 7.8$  Hz, 1H), 3.86 (dd,  $J = 10.4, 7.1$  Hz, 1H), 3.78 (d,  $J = 7.7$  Hz, 1H), 3.59 (t,  $J = 11.2$  Hz, 1H).  $^{13}\text{C}$  NMR (101 MHz,  $\text{CDCl}_3$ )  $\delta$  196.3, 177.0, 167.9, 161.1 (d,  $J = 247.8$  Hz), 152.4, 148.6, 136.5, 134.2 (d,  $J = 3.1$  Hz), 133.4, 133.0, 131.7, 130.8, 128.6 (d,  $J = 8.1$  Hz), 128.2, 127.7, 126.5, 124.3, 121.0, 118.0, 117.6, 116.7, 115.4, 115.3, 115.2, 57.7, 53.9, 53.0, 44.3, 44.2. HRMS (ESI) calcd for  $\text{C}_{32}\text{H}_{21}\text{BrFNO}_6\text{SNa}^+$   $[\text{M}+\text{Na}]^+$  668.0149, found 668.0148.

**3-benzoyl-8-bromo-2-(3-chlorophenyl)-1-(2,2-dioxidobenzo[e][1,2,3]oxathiazin-4-yl)-1,3,3a,9b-tetrahydrocyclopenta[c]chromen-4(2H)-one (3ea)**

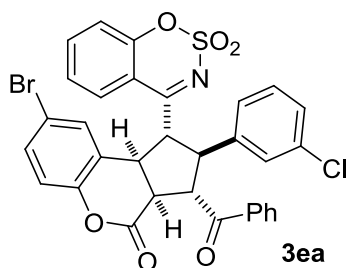

Orange solid (86%, 57.0mg), mp = 239 – 241 °C.  $^1\text{H}$  NMR (400 MHz,  $\text{CDCl}_3$ )  $\delta$  7.77 (d,  $J = 7.8$  Hz, 2H), 7.52 – 7.42 (m, 2H), 7.33 – 7.24 (m, 3H), 7.17 – 7.04 (m, 5H), 7.01 – 6.88 (m, 2H), 6.79 (t,  $J = 7.7$  Hz, 1H), 6.64 (d,  $J = 8.1$  Hz, 1H), 4.97 (d,  $J = 6.9$  Hz, 1H), 4.03 (dd,  $J = 11.6, 7.9$  Hz, 1H), 3.91 (dd,  $J = 10.2, 7.2$  Hz, 2H), 3.76 (d,  $J = 7.7$  Hz, 1H), 3.61 (t,  $J = 11.2$  Hz, 1H).  $^{13}\text{C}$  NMR (101 MHz,  $\text{CDCl}_3$ )  $\delta$  196.2, 176.8, 167.7, 152.4, 148.6, 140.5, 136.6, 134.2, 133.4, 133.1, 131.7, 130.8, 129.6, 128.2, 127.7, 127.2, 126.9, 126.5, 125.2, 124.2, 120.9, 118.0, 117.7, 116.7, 115.3, 57.3, 53.7, 52.8, 44.3. HRMS (ESI) calcd for  $\text{C}_{32}\text{H}_{21}\text{BrClNO}_6\text{SNa}^+$   $[\text{M}+\text{Na}]^+$  683.9854, found 683.9851.

**3-benzoyl-8-bromo-2-(4-chlorophenyl)-1-(2,2-dioxidobenzo[e][1,2,3]oxathiazin-4-yl)-1,3,3a,9b-tetrahydrocyclopenta[c]chromen-4(2H)-one (3eb)**

**etrahydrocyclopenta[*c*]chromen-4(2*H*)-one (3fa)**

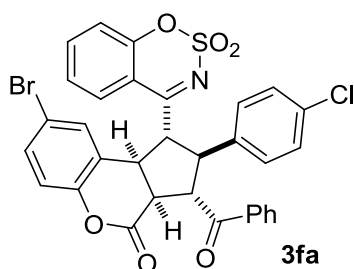

Yellow solid (80%, 53.0mg), mp = 72 – 74 °C. <sup>1</sup>H NMR (400 MHz, CDCl<sub>3</sub>) δ 7.75 (d, *J* = 7.7 Hz, 2H), 7.47 (t, *J* = 7.7 Hz, 2H), 7.29 (t, *J* = 7.8 Hz, 3H), 7.17 – 7.09 (m, 4H), 7.04 (d, *J* = 7.9 Hz, 2H), 6.92 (d, *J* = 8.7 Hz, 1H), 6.79 (t, *J* = 7.7 Hz, 1H), 6.59 (d, *J* = 8.0 Hz, 1H), 4.96 (d, *J* = 6.9 Hz, 1H), 4.03 (dd, *J* = 11.9, 7.7 Hz, 1H), 3.89 (dd, *J* = 10.6, 7.0 Hz, 1H), 3.78 (d, *J* = 7.7 Hz, 1H), 3.58 (t, *J* = 11.2 Hz, 1H). <sup>13</sup>C NMR (101 MHz, CDCl<sub>3</sub>) δ 196.3, 176.8, 167.9, 152.4, 148.6, 137.0, 136.6, 133.4, 133.0, 132.8, 131.7, 130.8, 128.5, 128.3, 128.2, 127.7, 126.5, 124.3, 120.9, 118.0, 117.7, 116.8, 115.3, 57.6, 53.7, 52.8, 44.5, 44.3. HRMS (ESI) calcd for C<sub>32</sub>H<sub>21</sub>BrClNO<sub>6</sub>SNa<sup>+</sup> [M+Na]<sup>+</sup> 683.9854, found 683.9853.

**3-benzoyl-8-bromo-2-(3-bromophenyl)-1-(2,2-dioxidobenzo[*e*][1,2,3]oxathiazin-4-yl)-1,3,3a,9b-tetrahydrocyclopenta[*c*]chromen-4(2*H*)-one (3ga)**

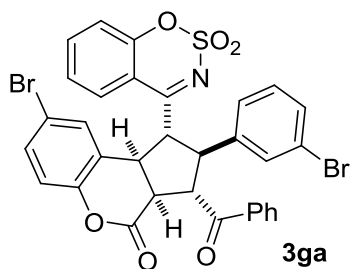

Orange solid (79%, 55.9mg), mp = 233 – 235 °C. <sup>1</sup>H NMR (400 MHz, CDCl<sub>3</sub>) δ 7.78 (d, *J* = 8.1 Hz, 2H), 7.54 – 7.42 (m, 2H), 7.34 – 7.22 (m, 5H), 7.19 – 7.08 (m, 2H), 7.06 – 7.00 (m, 2H), 6.92 (d, *J* = 8.7 Hz, 1H), 6.79 (t, *J* = 7.7 Hz, 1H), 6.64 (d, *J* = 8.1 Hz, 1H), 4.97 (d, *J* = 7.0 Hz, 1H), 4.03 (dd, *J* = 11.8, 7.7 Hz, 1H), 3.90 (dd, *J* = 10.6, 7.0 Hz, 1H), 3.76 (d, *J* = 7.8 Hz, 1H), 3.61 (t, *J* = 11.2 Hz, 1H). <sup>13</sup>C NMR (101 MHz, CDCl<sub>3</sub>) δ 196.1, 176.8, 167.7, 152.4, 148.6, 140.7, 136.6, 133.4, 133.1, 131.7, 130.9, 130.1, 129.9, 129.9, 128.2, 127.8, 126.5, 125.7, 124.2, 122.3, 120.9, 118.0, 117.7, 116.8, 115.3, 57.3, 53.6, 52.8, 44.3, 44.2. HRMS (ESI) calcd for C<sub>32</sub>H<sub>21</sub>Br<sub>2</sub>NO<sub>6</sub>SNa<sup>+</sup> [M+Na]<sup>+</sup> 727.9349, found 727.9345.



**3-benzoyl-8-bromo-2-(4-bromophenyl)-1-(2,2-dioxidobenzo[*e*][1,2,3]oxathiazin-4-yl)-1,3,3a,9b-tetrahydrocyclopenta[*c*]chromen-4(2*H*)-one (3ha)**

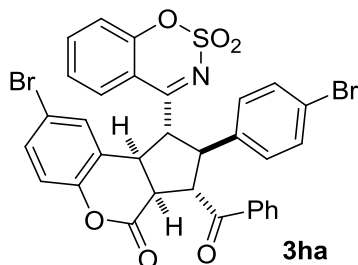

Orange solid (80%, 56.6mg), mp = 231 – 233 °C. <sup>1</sup>H NMR (400 MHz, CDCl<sub>3</sub>) δ 7.75 (d, *J* = 7.9 Hz, 2H), 7.47 (t, *J* = 7.7 Hz, 2H), 7.33 – 7.24 (m, 5H), 7.16 – 7.09 (m, 2H), 6.98 (d, *J* = 7.9 Hz, 2H), 6.92 (d, *J* = 8.7 Hz, 1H), 6.80 (t, *J* = 7.7 Hz, 1H), 6.59 (d, *J* = 8.1 Hz, 1H), 4.96 (d, *J* = 6.9 Hz, 1H), 4.02 (dd, *J* = 11.7, 7.8 Hz, 1H), 3.89 (dd, *J* = 10.3, 7.1 Hz, 1H), 3.78 (d, *J* = 7.7 Hz, 1H), 3.58 (t, *J* = 11.2 Hz, 1H). <sup>13</sup>C NMR (101 MHz, CDCl<sub>3</sub>) δ 196.2, 176.8, 167.8, 152.4, 148.6, 137.5, 136.6, 133.4, 133.1, 131.7, 131.5, 130.8, 128.6, 128.2, 127.7, 126.5, 124.3, 120.9, 120.9, 118.0, 117.7, 116.7, 115.3, 57.5, 53.7, 52.8, 44.6, 44.3. HRMS (ESI) calcd for C<sub>32</sub>H<sub>21</sub>Br<sub>2</sub>NO<sub>6</sub>SNa<sup>+</sup> [M+Na]<sup>+</sup> 727.9349, found 727.9345.

**4-(3-benzoyl-8-bromo-1-(2,2-dioxidobenzo[*e*][1,2,3]oxathiazin-4-yl)-4-oxo-1,2,3,3a,4,9b-hexahydrocyclopenta[*c*]chromen-2-yl)benzonitrile (3ia)**

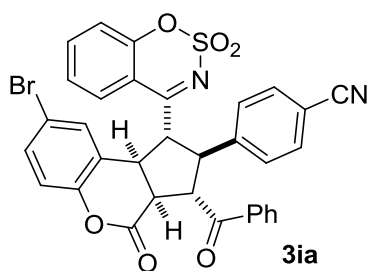

Yellow solid (75%, 49.0mg), mp = 62 – 64 °C. <sup>1</sup>H NMR (400 MHz, CDCl<sub>3</sub>) δ 7.77 (d, *J* = 7.9 Hz, 2H), 7.54 – 7.40 (m, 4H), 7.35 – 7.23 (m, 5H), 7.15 (d, *J* = 8.3 Hz, 1H), 7.06 (s, 1H), 6.93 (d, *J* = 8.7 Hz, 1H), 6.80 (t, *J* = 7.7 Hz, 1H), 6.60 (d, *J* = 8.1 Hz, 1H), 4.99 (d, *J* = 7.0 Hz, 1H), 4.13 (dd, *J* = 10.5, 7.1 Hz, 1H), 3.99 (dd, *J* = 11.7, 7.7 Hz, 1H), 3.76 (d, *J* = 7.7 Hz, 1H), 3.62 (t, *J* = 11.2 Hz, 1H). <sup>13</sup>C NMR (101 MHz, CDCl<sub>3</sub>) δ 195.9, 176.3, 167.6, 152.5, 148.6, 144.0, 136.9, 133.4, 133.2, 132.1, 131.9, 130.8, 128.1, 127.9, 126.2, 124.4, 120.5, 118.2, 117.7, 117.1, 116.8, 115.3, 110.9, 57.0, 53.4,

52.4, 45.0, 44.6. HRMS (ESI) calcd for  $C_{33}H_{21}BrN_2O_6SNa^+$   $[M+Na]^+$  675.0196 found 675.0193.

**3-benzoyl-8-bromo-1-(2,2-dioxidobenzo[*e*][1,2,3]oxathiazin-4-yl)-2-(*o*-tolyl)-1,3,3a,9b-tetrahydrocyclopenta[*c*]chromen-4(2*H*)-one (3ja)**

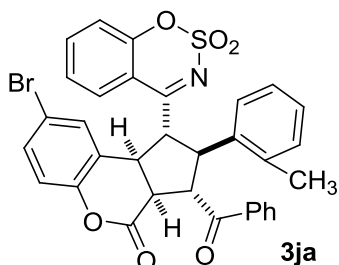

White solid (79%, 50.8mg), mp = 190 – 192 °C.  $^1H$  NMR (400 MHz,  $CDCl_3$ )  $\delta$  7.70 (d,  $J$  = 8.0 Hz, 2H), 7.54 – 7.36 (m, 3H), 7.34 – 7.18 (m, 5H), 7.07 (d,  $J$  = 8.3 Hz, 1H), 7.01 (t,  $J$  = 7.5 Hz, 1H), 6.91 (d,  $J$  = 8.2 Hz, 1H), 6.74 – 6.68 (m, 2H), 6.52 (d,  $J$  = 8.1 Hz, 1H), 4.96 (d,  $J$  = 7.1 Hz, 1H), 4.17 (dd,  $J$  = 11.8, 7.9 Hz, 1H), 4.07 (dd,  $J$  = 10.4, 7.2 Hz, 1H), 3.87 (d,  $J$  = 7.9 Hz, 1H), 3.63 (t,  $J$  = 11.2 Hz, 1H), 1.57 (s, 3H).  $^{13}C$  NMR (101 MHz,  $CDCl_3$ )  $\delta$  196.5, 177.3, 168.1, 152.4, 148.7, 137.0, 136.4, 136.2, 133.6, 132.8, 131.6, 130.9, 129.6, 128.1, 127.6, 126.8, 126.7, 126.7, 125.6, 124.2, 121.3, 117.8, 117.6, 116.7, 115.2, 58.4, 55.4, 49.4, 43.8, 43.7, 18.1. HRMS (ESI) calcd for  $C_{33}H_{24}BrNO_6SNa^+$   $[M+Na]^+$  664.0400 found 664.0399.

**3-benzoyl-8-bromo-1-(2,2-dioxidobenzo[*e*][1,2,3]oxathiazin-4-yl)-2-(*m*-tolyl)-1,3,3a,9b-tetrahydrocyclopenta[*c*]chromen-4(2*H*)-one (3ka)**

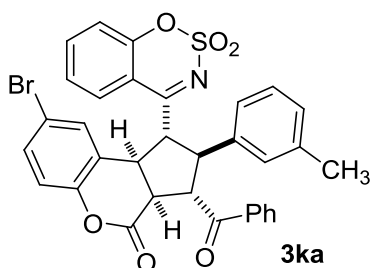

Orange solid (76%, 48.8mg), mp = 226 – 228 °C.  $^1H$  NMR (400 MHz,  $CDCl_3$ )  $\delta$  7.75 (d,  $J$  = 8.0 Hz, 2H), 7.49 – 7.36 (m, 2H), 7.31 – 7.19 (m, 4H), 7.12 – 7.00 (m, 2H), 6.95 – 6.86 (m, 3H), 6.80 (s, 1H), 6.72 (t,  $J$  = 7.7 Hz, 1H), 6.56 (d,  $J$  = 8.1 Hz, 1H), 5.00 (d,  $J$  = 6.9 Hz, 1H), 4.09 (dd,  $J$  = 11.7, 7.8 Hz, 1H), 3.91 – 3.70 (m, 2H), 3.61 (t,  $J$  = 11.1 Hz, 1H), 2.11 (s, 3H).  $^{13}C$  NMR (101 MHz,  $CDCl_3$ )  $\delta$  196.6, 177.3, 167.9, 152.4, 148.7, 138.3, 138.1, 136.2, 133.5, 132.8, 131.5, 130.9, 128.3, 128.3,

127.7, 127.6, 127.6, 126.8, 124.1, 123.7, 121.3, 117.8, 117.6, 116.7, 115.5, 57.8, 54.1, 54.0, 44.2, 44.1, 20.3. HRMS (ESI) calcd for  $C_{33}H_{24}BrNO_6SNa^+$   $[M+Na]^+$  664.0400 found 664.0399.

**3-benzoyl-8-bromo-1-(2,2-dioxidobenzo[*e*][1,2,3]oxathiazin-4-yl)-2-(*p*-tolyl)-1,3,3a,9b-tetrahydrocyclopenta[*c*]chromen-4(2*H*)-one (3la)**

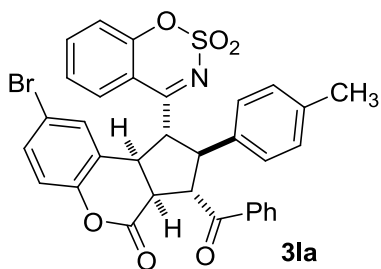

Yellow solid (73%, 46.9mg), mp = 201 – 203 °C.  $^1H$  NMR (400 MHz,  $CDCl_3$ )  $\delta$  7.73 (d,  $J$  = 8.0 Hz, 2H), 7.43 (q,  $J$  = 8.0 Hz, 2H), 7.30 – 7.22 (m, 3H), 7.08 (d,  $J$  = 8.3 Hz, 1H), 6.98 – 6.87 (m, 5H), 6.72 (t,  $J$  = 7.7 Hz, 1H), 6.55 (d,  $J$  = 8.1 Hz, 1H), 4.99 (d,  $J$  = 6.9 Hz, 1H), 4.08 (dd,  $J$  = 11.7, 7.8 Hz, 1H), 3.86 – 3.72 (m, 2H), 3.60 (t,  $J$  = 11.1 Hz, 1H), 2.19 (s, 3H).  $^{13}C$  NMR (101 MHz,  $CDCl_3$ )  $\delta$  196.6, 177.3, 168.0, 152.4, 148.7, 136.7, 136.3, 135.3, 133.5, 132.8, 131.5, 130.8, 129.0, 128.3, 127.6, 126.8, 126.7, 124.1, 121.3, 117.8, 117.6, 116.7, 115.4, 58.0, 54.0, 53.8, 44.2, 44.2, 20.0. HRMS (ESI) calcd for  $C_{33}H_{24}BrNO_6SNa^+$   $[M+Na]^+$  664.0400 found 664.0399.

**3-benzoyl-8-bromo-1-(2,2-dioxidobenzo[*e*][1,2,3]oxathiazin-4-yl)-2-(2-methoxyphenyl)-1,3,3a,9b-tetrahydrocyclopenta[*c*]chromen-4(2*H*)-one (3ma)**

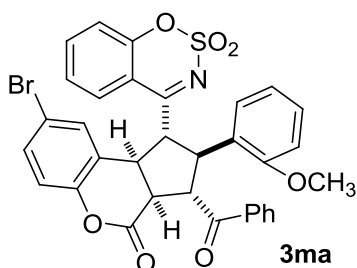

Orange solid (67%, 44.1mg), mp = 56 – 58 °C.  $^1H$  NMR (400 MHz,  $CDCl_3$ )  $\delta$  7.76 (d,  $J$  = 8.0 Hz, 2H), 7.40 (q,  $J$  = 8.1 Hz, 2H), 7.35 – 7.18 (m, 4H), 7.12 – 7.02 (m, 2H), 6.93 – 6.86 (m, 2H), 6.76 – 6.58 (m, 4H), 5.09 (d,  $J$  = 7.2 Hz, 1H), 4.22 – 4.03 (m, 2H), 3.92 (dd,  $J$  = 9.8, 7.5 Hz, 1H), 3.78 (d,  $J$  = 7.7 Hz, 1H), 3.61 (s, 3H).  $^{13}C$  NMR (101 MHz,  $CDCl_3$ )  $\delta$  197.2, 177.9, 167.9, 155.9, 152.3, 148.8, 134.0, 133.9, 132.6, 131.3, 131.0, 129.1, 128.4, 128.3, 127.5, 126.5, 125.3, 124.0, 121.9, 120.3, 117.,

117.56, 116.6, 115.6, 109.7, 54.1, 53.9, 52.7, 50.8, 43.7, 43.1. HRMS (ESI) calcd for  $C_{33}H_{24}BrNO_7SNa^+$   $[M+Na]^+$  680.0349 found 680.0348.

**3-benzoyl-8-bromo-1-(2,2-dioxidobenzo[*e*][1,2,3]oxathiazin-4-yl)-2-(3-methoxyphenyl)-1,3,3a,9b-tetrahydrocyclopenta[*c*]chromen-4(2*H*)-one (3na)**

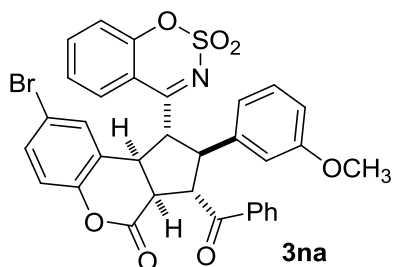

Orange solid (75%, 49.4mg), mp = 93 – 94 °C.  $^1H$  NMR (400 MHz,  $CDCl_3$ )  $\delta$  7.76 (d,  $J$  = 7.9 Hz, 2H), 7.44 (q,  $J$  = 7.5 Hz, 2H), 7.31 – 7.21 (m, 3H), 7.13 – 7.04 (m, 2H), 6.91 (d,  $J$  = 8.7 Hz, 1H), 6.80 – 6.68 (m, 2H), 6.65 (dd,  $J$  = 8.2, 1.9 Hz, 1H), 6.62 – 6.51 (m, 2H), 5.03 (d,  $J$  = 6.8 Hz, 1H), 4.08 (dd,  $J$  = 11.8, 7.8 Hz, 1H), 3.85 – 3.76 (m, 2H), 3.67 – 3.56 (m, 1H), 3.57 (s, 3H).  $^{13}C$  NMR (101 MHz,  $CDCl_3$ )  $\delta$  196.5, 177.3, 167.9, 159.2, 152.4, 148.7, 140.0, 136.4, 133.5, 132.9, 131.6, 130.8, 129.5, 128.3, 127.6, 126.7, 124.2, 121.2, 118.7, 117.8, 117.6, 116.7, 115.5, 112.9, 112.1, 57.8, 54.2, 54.1, 53.7, 44.2, 44.2. HRMS (ESI) calcd for  $C_{33}H_{24}BrNO_7SNa^+$   $[M+Na]^+$  680.0349 found 680.0347.

**3-benzoyl-8-bromo-1-(2,2-dioxidobenzo[*e*][1,2,3]oxathiazin-4-yl)-2-(4-methoxyphenyl)-1,3,3a,9b-tetrahydrocyclopenta[*c*]chromen-4(2*H*)-one (3oa)**

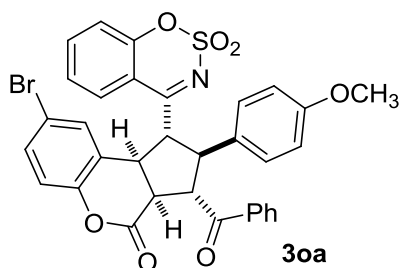

Yellow solid (77%, 50.7mg), mp = 205 – 207 °C.  $^1H$  NMR (400 MHz,  $CDCl_3$ )  $\delta$  7.73 (d,  $J$  = 7.9 Hz, 2H), 7.43 (q,  $J$  = 7.6, 7.2 Hz, 2H), 7.31 – 7.21 (m, 4H), 7.09 (d,  $J$  = 8.3 Hz, 1H), 6.99 (d,  $J$  = 8.2 Hz, 2H), 6.91 (d,  $J$  = 8.7 Hz, 1H), 6.76 (t,  $J$  = 7.7 Hz, 1H), 6.67 (d,  $J$  = 8.1 Hz, 2H), 6.58 (d,  $J$  = 8.1 Hz, 1H), 4.97 (d,  $J$  = 6.9 Hz, 1H), 4.08 (dd,  $J$  = 11.7, 7.8 Hz, 1H), 3.79 (d,  $J$  = 7.8 Hz, 1H), 3.75 (dd,  $J$  =

10.3, 7.1 Hz, 1H), 3.66 (s, 3H), 3.59 (t,  $J = 11.1$  Hz, 1H).  $^{13}\text{C}$  NMR (101 MHz,  $\text{CDCl}_3$ )  $\delta$  196.6, 177.4, 168.0, 158.1, 152.4, 148.7, 136.3, 133.5, 132.9, 131.5, 130.8, 130.2, 128.3, 128.0, 127.6, 126.8, 124.2, 121.3, 117.8, 117.6, 116.7, 115.4, 113.6, 58.0, 54.3, 54.1, 53.6, 44.1, 44.1. HRMS (ESI) calcd for  $\text{C}_{33}\text{H}_{24}\text{BrNO}_7\text{SNa}^+$   $[\text{M}+\text{Na}]^+$  680.0349 found 680.0348.

**3-benzoyl-8-bromo-1-(2,2-dioxidobenzo[*e*][1,2,3]oxathiazin-4-yl)-2-(naphthalen-2-yl)-1,3,3a,9b-tetrahydrocyclopenta[*c*]chromen-4(2*H*)-one (3pa)**

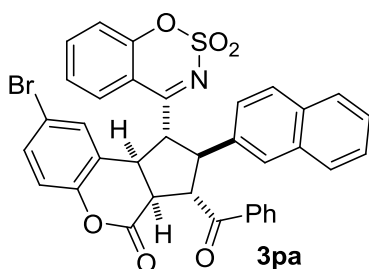

Orange solid (72%, 48.8mg), mp = 122 – 124 °C.  $^1\text{H}$  NMR (400 MHz,  $\text{CDCl}_3$ )  $\delta$  7.73 (d,  $J = 8.2$  Hz, 3H), 7.69 (d,  $J = 7.6$  Hz, 1H), 7.54 (d,  $J = 7.6$  Hz, 1H), 7.46 – 7.21 (m, 7H), 7.17 (d,  $J = 8.5$  Hz, 3H), 7.02 (d,  $J = 8.3$  Hz, 1H), 6.93 (d,  $J = 8.7$  Hz, 1H), 6.55 – 6.44 (m, 2H), 5.13 (d,  $J = 6.9$  Hz, 1H), 4.13 (dd,  $J = 11.8, 7.7$  Hz, 1H), 4.02 (dd,  $J = 10.4, 6.9$  Hz, 1H), 3.86 (d,  $J = 7.8$  Hz, 1H), 3.74 (t,  $J = 11.1$  Hz, 1H).  $^{13}\text{C}$  NMR (101 MHz,  $\text{CDCl}_3$ )  $\delta$  196.5, 177.2, 168.0, 152.3, 148.7, 136.3, 135.4, 133.5, 132.9, 132.2, 131.6, 130.8, 128.7, 128.3, 127.6, 126.8, 126.6, 126.5, 125.6, 125.4, 124.0, 123.6, 121.2, 117.7, 117.7, 116.7, 115.4, 57.6, 54.1, 53.8, 44.4, 44.3. HRMS (ESI) calcd for  $\text{C}_{36}\text{H}_{24}\text{BrNO}_6\text{SNa}^+$   $[\text{M}+\text{Na}]^+$  700.0400, found 700.0398.

**3-benzoyl-8-bromo-1-(2,2-dioxidobenzo[*e*][1,2,3]oxathiazin-4-yl)-2-(thiophen-2-yl)-1,3,3a,9b-tetrahydrocyclopenta[*c*]chromen-4(2*H*)-one (3qa)**

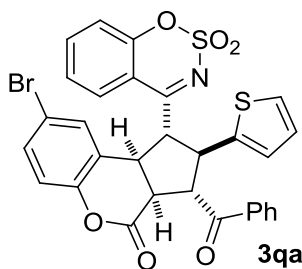

Orange solid (74%, 46.9mg), mp = 228 – 230 °C.  $^1\text{H}$  NMR (400 MHz,  $\text{CDCl}_3$ )  $\delta$  7.88 (d,  $J = 8.0$  Hz, 2H), 7.55 – 7.42 (m, 2H), 7.33 (t,  $J = 7.6$  Hz, 2H), 7.27 (dd,  $J = 8.8, 2.3$  Hz, 1H), 7.14 (d,  $J = 8.3$  Hz,

2H), 7.08 – 7.02 (m, 1H), 6.94 – 6.83 (m, 2H), 6.80 – 6.67 (m, 3H), 5.05 (d,  $J = 7.1$  Hz, 1H), 4.27 (dd,  $J = 10.3, 7.1$  Hz, 1H), 4.06 (dd,  $J = 11.8, 7.9$  Hz, 1H), 3.80 – 3.61 (m, 2H).  $^{13}\text{C}$  NMR (101 MHz,  $\text{CDCl}_3$ )  $\delta$  196.2, 177.0, 167.5, 152.5, 148.7, 141.7, 136.5, 133.6, 133.0, 131.7, 130.7, 128.3, 127.8, 126.5, 125.6, 124.4, 124.3, 120.9, 118.0, 117.7, 116.7, 115.7, 58.1, 55.1, 48.2, 44.5, 44.2. HRMS (ESI) calcd for  $\text{C}_{30}\text{H}_{20}\text{BrNO}_6\text{S}_2\text{Na}^+$   $[\text{M}+\text{Na}]^+$  655.9808, found 655.9806.

**3-benzoyl-1-(2,2-dioxidobenzo[*e*][1,2,3]oxathiazin-4-yl)-8-fluoro-2-phenyl-1,3,3a,9b-tetrahydrocyclopenta[*c*]chromen-4(2*H*)-one (3ab)**

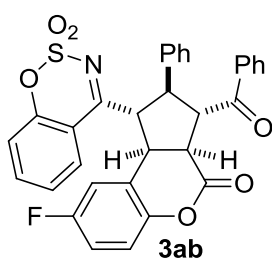

Orange solid (88%, 49.9mg), mp = 237 – 239 °C.  $^1\text{H}$  NMR (400 MHz,  $\text{CDCl}_3$ )  $\delta$  7.75 (d,  $J = 7.9$  Hz, 2H), 7.48 – 7.34 (m, 2H), 7.27 – 7.21 (m, 2H), 7.17 – 6.95 (m, 7H), 6.92 – 6.79 (m, 2H), 6.72 (t,  $J = 7.7$  Hz, 1H), 6.54 (d,  $J = 8.1$  Hz, 1H), 5.04 (d,  $J = 6.9$  Hz, 1H), 4.14 (dd,  $J = 11.7, 7.8$  Hz, 1H), 3.92 – 3.74 (m, 2H), 3.64 (t,  $J = 11.1$  Hz, 1H).  $^{13}\text{C}$  NMR (101 MHz,  $\text{CDCl}_3$ )  $\delta$  196.6, 177.4, 168.2, 158.1 (d,  $J = 246.1$  Hz), 152.4, 145.7 (d,  $J = 2.4$  Hz), 138.4, 136.3, 133.6, 132.9, 128.4, 128.3, 127.6, 127.0, 126.9, 126.8, 124.2, 120.8 (d,  $J = 8.0$  Hz), 117.8, 117.4 (d,  $J = 8.6$  Hz), 115.6, 115.4, 114.6, 114.4, 57.9, 54.6, 54.0, 44.4, 44.2. HRMS (ESI) calcd for  $\text{C}_{32}\text{H}_{22}\text{FNO}_6\text{SNa}^+$   $[\text{M}+\text{Na}]^+$  590.1044 found 590.1047.

**3-benzoyl-8-chloro-1-(2,2-dioxidobenzo[*e*][1,2,3]oxathiazin-4-yl)-2-phenyl-1,3,3a,9b-tetrahydrocyclopenta[*c*]chromen-4(2*H*)-one (3ac)**

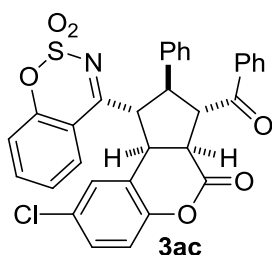

Orange solid (78%, 45.6mg), mp = 228 – 230 °C.  $^1\text{H}$  NMR (400 MHz,  $\text{CDCl}_3$ )  $\delta$  7.74 (d,  $J = 8.0$  Hz,

2H), 7.56 – 7.35 (m, 2H), 7.29 – 7.20 (m, 2H), 7.17 – 7.03 (m, 8H), 6.97 (d,  $J = 8.7$  Hz, 1H), 6.71 (t,  $J = 7.7$  Hz, 1H), 6.54 (d,  $J = 8.1$  Hz, 1H), 5.03 (d,  $J = 6.9$  Hz, 1H), 4.12 (dd,  $J = 11.7, 7.8$  Hz, 1H), 3.90 – 3.75 (m, 2H), 3.62 (t,  $J = 11.1$  Hz, 1H).  $^{13}\text{C}$  NMR (101 MHz,  $\text{CDCl}_3$ )  $\delta$  196.5, 177.2, 168.0, 152.5, 148.2, 138.4, 136.3, 133.5, 132.9, 129.3, 128.6, 128.4, 128.3, 127.9, 127.6, 127.0, 126.9, 126.7, 124.2, 120.9, 117.8, 117.3, 115.4, 57.9, 54.4, 54.0, 44.2, 44.2. HRMS (ESI) calcd for  $\text{C}_{32}\text{H}_{22}\text{ClNO}_6\text{SNa}^+ [\text{M}+\text{Na}]^+$  606.0749 found 606.0749.

**3-benzoyl-7-chloro-1-(2,2-dioxidobenzo[*e*][1,2,3]oxathiazin-4-yl)-2-phenyl-1,3,3a,9b-tetrahydrocyclopenta[*c*]chromen-4(2*H*)-one (3ad)**

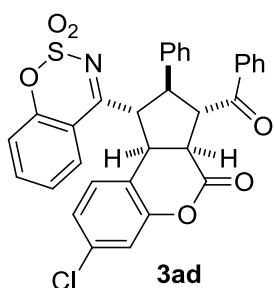

Orange solid (84%, 49.1mg), mp = 190 – 192 °C.  $^1\text{H}$  NMR (400 MHz,  $\text{CDCl}_3$ )  $\delta$  7.74 (d,  $J = 7.9$  Hz, 2H), 7.50 – 7.35 (m, 2H), 7.29 – 7.20 (m, 2H), 7.17 – 7.00 (m, 8H), 6.89 (d,  $J = 8.2$  Hz, 1H), 6.74 (t,  $J = 7.7$  Hz, 1H), 6.53 (d,  $J = 8.1$  Hz, 1H), 5.03 (d,  $J = 7.0$  Hz, 1H), 4.18 (dd,  $J = 11.7, 7.9$  Hz, 1H), 3.89 – 3.72 (m, 2H), 3.61 (t,  $J = 11.2$  Hz, 1H).  $^{13}\text{C}$  NMR (101 MHz,  $\text{CDCl}_3$ )  $\delta$  197.6, 178.5, 169.0, 153.5, 151.1, 139.4, 137.3, 135.0, 134.6, 133.9, 130.0, 129.5, 129.4, 128.7, 128.0, 127.9, 125.5, 125.4, 118.9, 118.8, 117.4, 116.5, 59.1, 55.7, 55.1, 45.4, 45.1. HRMS (ESI) calcd for  $\text{C}_{32}\text{H}_{22}\text{ClNO}_6\text{SNa}^+ [\text{M}+\text{Na}]^+$  606.0749 found 606.0750.

**3-benzoyl-7-bromo-1-(2,2-dioxidobenzo[*e*][1,2,3]oxathiazin-4-yl)-2-phenyl-1,3,3a,9b-tetrahydrocyclopenta[*c*]chromen-4(2*H*)-one (3ae)**

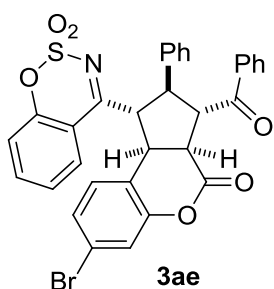

Orange solid (86%, 54.0mg), mp = 197 – 199 °C. <sup>1</sup>H NMR (400 MHz, CDCl<sub>3</sub>) δ 7.74 (d, *J* = 8.0 Hz, 2H), 7.48 – 7.34 (m, 2H), 7.29 – 7.20 (m, 2H), 7.17 – 6.96 (m, 8H), 6.74 (t, *J* = 7.7 Hz, 1H), 6.52 (d, *J* = 8.1 Hz, 1H), 5.03 (d, *J* = 7.0 Hz, 1H), 4.17 (dd, *J* = 11.7, 7.8 Hz, 1H), 3.95 – 3.74 (m, 2H), 3.61 (t, *J* = 11.2 Hz, 1H). <sup>13</sup>C NMR (101 MHz, CDCl<sub>3</sub>) δ 196.5, 177.4, 167.9, 152.4, 150.1, 138.3, 136.3, 133.5, 132.9, 129.2, 128.4, 128.3, 127.6, 127.3, 127.0, 126.8, 124.3, 121.5, 119.2, 118.3, 117.8, 115.4, 58.0, 54.7, 54.0, 44.3, 44.1. HRMS (ESI) calcd for C<sub>32</sub>H<sub>22</sub>BrNO<sub>6</sub>SNa<sup>+</sup> [M+Na]<sup>+</sup> 650.0243 found 650.0243.

**3-benzoyl-1-(2,2-dioxidobenzo[*e*][1,2,3]oxathiazin-4-yl)-8-methyl-2-phenyl-1,3,3a,9b-tetrahydrocyclopenta[*c*]chromen-4(2*H*)-one (3af)**

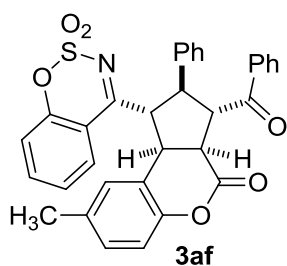

White solid (87%, 49.0mg), mp = 220 – 222 °C. <sup>1</sup>H NMR (400 MHz, CDCl<sub>3</sub>) δ 7.77 (d, *J* = 7.9 Hz, 2H), 7.52 – 7.31 (m, 2H), 7.29 – 7.20 (m, 2H), 7.16 – 7.01 (m, 6H), 6.98 – 6.87 (m, 2H), 6.84 (s, 1H), 6.70 (t, *J* = 7.7 Hz, 1H), 6.55 (d, *J* = 8.1 Hz, 1H), 5.03 (d, *J* = 7.0 Hz, 1H), 4.07 (dd, *J* = 11.8, 7.7 Hz, 1H), 3.90 (dd, *J* = 10.5, 6.9 Hz, 1H), 3.76 (d, *J* = 7.8 Hz, 1H), 3.63 (t, *J* = 11.2 Hz, 1H), 2.04 (s, 3H). <sup>13</sup>C NMR (101 MHz, CDCl<sub>3</sub>) δ 196.8, 177.7, 168.7, 152.4, 147.5, 138.7, 136.0, 133.9, 133.7, 132.8, 129.0, 128.4, 128.3, 128.3, 127.6, 126.9, 126.8, 124.1, 118.7, 117.6, 115.6, 115.6, 58.1, 54.1, 54.0, 44.9, 44.8, 19.5. HRMS (ESI) calcd for C<sub>33</sub>H<sub>25</sub>NO<sub>6</sub>SNa<sup>+</sup> [M+Na]<sup>+</sup> 586.1295 found 586.1297.

**3-benzoyl-1-(2,2-dioxidobenzo[*e*][1,2,3]oxathiazin-4-yl)-8-methoxy-2-phenyl-1,3,3a,9b-tetrahydrocyclopenta[*c*]chromen-4(2*H*)-one (3ag)**

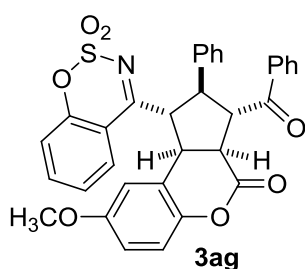



White solid (94%, 54.5mg), mp = 203 – 205 °C. <sup>1</sup>H NMR (400 MHz, CDCl<sub>3</sub>) δ 7.78 (d, *J* = 8.0 Hz, 2H), 7.47 – 7.34 (m, 2H), 7.30 – 7.20 (m, 2H), 7.17 – 7.01 (m, 6H), 6.94 (d, *J* = 8.9 Hz, 1H), 6.77 – 6.65 (m, 2H), 6.64 – 6.58 (m, 1H), 6.55 (d, *J* = 8.1 Hz, 1H), 5.04 (d, *J* = 7.0 Hz, 1H), 4.14 (dd, *J* = 11.7, 7.9 Hz, 1H), 3.87 (dd, *J* = 10.4, 7.1 Hz, 1H), 3.75 (d, *J* = 7.9 Hz, 1H), 3.64 (t, *J* = 11.2 Hz, 1H), 3.53 (s, 3H). <sup>13</sup>C NMR (101 MHz, CDCl<sub>3</sub>) δ 196.8, 177.8, 168.6, 155.5, 152.4, 143.4, 138.6, 136.2, 133.7, 132.8, 128.3, 128.3, 127.6, 126.9, 126.9, 124.3, 119.6, 117.7, 117.0, 115.8, 115.5, 110.7, 58.0, 54.6, 54.3, 54.2, 45.1, 44.5. HRMS (ESI) calcd for C<sub>33</sub>H<sub>25</sub>NO<sub>7</sub>SNa<sup>+</sup> [M+Na]<sup>+</sup> 602.1244 found 602.1246.

**3-benzoyl-1-(2,2-dioxidobenzo[*e*][1,2,3]oxathiazin-4-yl)-7-methyl-2-phenyl-1,3,3a,9b-tetrahydrocyclopenta[*c*]chromen-4(2*H*)-one (3ah)**

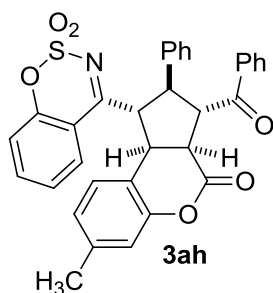

Orange solid (86%, 48.5mg), mp = 186 – 188 °C. <sup>1</sup>H NMR (400 MHz, CDCl<sub>3</sub>) δ 7.77 (d, *J* = 8.0 Hz, 2H), 7.49 – 7.32 (m, 2H), 7.29 – 7.19 (m, 2H), 7.17 – 7.05 (m, 5H), 7.03 (d, *J* = 8.3 Hz, 1H), 6.95 (d, *J* = 7.7 Hz, 1H), 6.83 (s, 1H), 6.70 (t, *J* = 8.3 Hz, 2H), 6.53 (d, *J* = 8.1 Hz, 1H), 5.04 (d, *J* = 7.0 Hz, 1H), 4.12 (dd, *J* = 11.7, 7.8 Hz, 1H), 3.89 (dd, *J* = 10.5, 7.1 Hz, 1H), 3.76 (d, *J* = 7.8 Hz, 1H), 3.62 (t, *J* = 11.2 Hz, 1H), 2.20 (s, 3H). <sup>13</sup>C NMR (101 MHz, CDCl<sub>3</sub>) δ 196.8, 177.9, 168.7, 152.4, 149.5, 139.0, 138.7, 136.0, 133.7, 132.8, 128.3, 128.3, 127.6, 127.6, 126.9, 126.9, 126.8, 125.0, 124.2, 117.7, 116.2, 116.0, 115.6, 58.2, 54.3, 54.0, 44.8, 44.7, 20.1. HRMS (ESI) calcd for C<sub>33</sub>H<sub>25</sub>NO<sub>6</sub>SNa<sup>+</sup> [M+Na]<sup>+</sup> 586.1295 found 586.1298.

**3-benzoyl-1-(2,2-dioxidobenzo[*e*][1,2,3]oxathiazin-4-yl)-7-methoxy-2-phenyl-1,3,3a,9b-tetrahydrocyclopenta[*c*]chromen-4(2*H*)-one (3ai)**

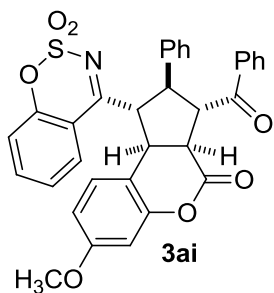

Yellow solid (83%, 48.1mg), mp = 231 – 233 °C. <sup>1</sup>H NMR (400 MHz, CDCl<sub>3</sub>) δ 7.76 (d, *J* = 8.0 Hz, 2H), 7.53 – 7.33 (m, 2H), 7.29 – 7.20 (m, 2H), 7.17 – 7.05 (m, 5H), 7.04 (d, *J* = 8.3 Hz, 1H), 6.96 (d, *J* = 8.5 Hz, 1H), 6.73 (t, *J* = 7.7 Hz, 1H), 6.57 (d, *J* = 5.5 Hz, 1H), 6.55 (s, 1H), 6.43 (dd, *J* = 8.9, 2.5 Hz, 1H), 5.02 (d, *J* = 7.1 Hz, 1H), 4.10 (dd, *J* = 11.8, 7.8 Hz, 1H), 3.89 (dd, *J* = 10.6, 7.1 Hz, 1H), 3.76 (d, *J* = 7.9 Hz, 1H), 3.65 (s, 3H), 3.61 (t, *J* = 11.1 Hz, 1H). <sup>13</sup>C NMR (101 MHz, CDCl<sub>3</sub>) δ 196.8, 178.0, 168.6, 159.5, 152.4, 150.5, 138.7, 136.1, 133.7, 132.8, 128.6, 128.3, 128.3, 127.6, 127.0, 126.9, 126.8, 124.2, 117.7, 115.6, 110.9, 109.9, 101.6, 58.3, 54.5, 54.2, 53.9, 44.8, 44.6. HRMS (ESI) calcd for C<sub>33</sub>H<sub>25</sub>NO<sub>7</sub>SNa<sup>+</sup> [M+Na]<sup>+</sup> 602.1244 found 602.1246.

**3-benzoyl-1-(2,2-dioxidobenzo[*e*][1,2,3]oxathiazin-4-yl)-2-phenyl-1,3,3a,9b-tetrahydrocyclopent a[*c*]chromen-4(2*H*)-one (3aj)**

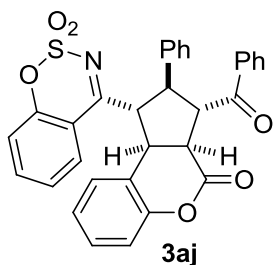

Orange solid (83%, 46.7mg), mp = 187 – 189 °C. <sup>1</sup>H NMR (400 MHz, CDCl<sub>3</sub>) δ 7.76 (d, *J* = 7.9 Hz, 2H), 7.40 (dt, *J* = 24.6, 7.5 Hz, 2H), 7.25 (t, *J* = 7.7 Hz, 2H), 7.18 – 6.99 (m, 9H), 6.88 (t, *J* = 7.5 Hz, 1H), 6.70 (t, *J* = 7.7 Hz, 1H), 6.53 (d, *J* = 8.0 Hz, 1H), 5.04 (d, *J* = 7.0 Hz, 1H), 4.14 (dd, *J* = 11.8, 7.8 Hz, 1H), 3.91 (dd, *J* = 10.5, 7.1 Hz, 1H), 3.80 (d, *J* = 7.8 Hz, 1H), 3.65 (t, *J* = 11.2 Hz, 1H). <sup>13</sup>C NMR (101 MHz, CDCl<sub>3</sub>) δ 196.8, 177.7, 168.5, 152.4, 149.7, 138.6, 136.1, 133.7, 132.8, 128.6, 128.3, 128.3, 128.0, 127.6, 126.9, 126.8, 124.2, 119.1, 117.7, 115.9, 115.6, 58.1, 54.2, 54.1, 45.0, 44.8. HRMS (ESI) calcd for C<sub>32</sub>H<sub>23</sub>NO<sub>6</sub>SNa<sup>+</sup> [M+Na]<sup>+</sup> 572.1138, found 572.1141.

**1-(2,2-dioxidobenzo[e][1,2,3]oxathiazin-4-yl)-3-(4-fluorobenzoyl)-2-phenyl-1,3,3a,9b-tetrahydrocyclopenta[*c*]chromen-4(2*H*)-one (3ak)**

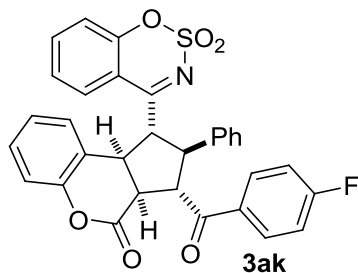

Orange solid (90%, 51.1mg), mp = 173 – 175 °C. <sup>1</sup>H NMR (400 MHz, CDCl<sub>3</sub>) δ 7.91 – 7.72 (m, 2H), 7.38 (t, *J* = 7.8 Hz, 1H), 7.19 – 7.00 (m, 9H), 6.97 – 6.80 (m, 3H), 6.71 (t, *J* = 7.7 Hz, 1H), 6.53 (d, *J* = 8.0 Hz, 1H), 4.99 (d, *J* = 7.1 Hz, 1H), 4.13 (dd, *J* = 11.8, 7.8 Hz, 1H), 3.87 (dd, *J* = 10.5, 7.2 Hz, 1H), 3.80 (dd, *J* = 7.8, 1.6 Hz, 1H), 3.66 (t, *J* = 11.2 Hz, 1H). <sup>13</sup>C NMR (101 MHz, CDCl<sub>3</sub>) δ 195.2, 177.6, 168.5, 165.1 (d, *J* = 256.4 Hz), 152.4, 149.6, 138.4, 136.1, 131.1 (d, *J* = 9.5 Hz), 130.1 (d, *J* = 2.9 Hz), 128.6, 128.4, 128.0, 127.0, 126.8, 126.8, 124.2 (d, *J* = 2.4 Hz), 119.0, 117.8, 116.0, 115.5, 114.9, 114.7, 58.0, 54.3, 54.1, 45.1, 44.6. HRMS (ESI) calcd for C<sub>32</sub>H<sub>22</sub>FNO<sub>6</sub>SNa<sup>+</sup> [M+Na]<sup>+</sup> 590.1044 found 590.1049.

**3-(4-bromobenzoyl)-1-(2,2-dioxidobenzo[e][1,2,3]oxathiazin-4-yl)-2-phenyl-1,3,3a,9b-tetrahydrocyclopenta[*c*]chromen-4(2*H*)-one (3al)**

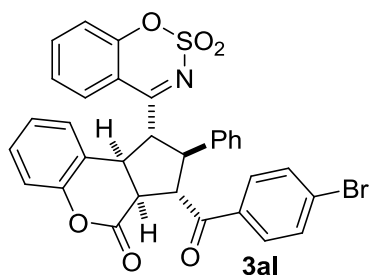

Orange solid (92%, 57.8mg), mp = 72 – 74 °C. <sup>1</sup>H NMR (400 MHz, CDCl<sub>3</sub>) δ 7.62 (s, 1H), 7.60 (s, 1H), 7.42 – 7.34 (m, 3H), 7.19 – 6.99 (m, 9H), 6.88 (t, *J* = 7.5 Hz, 1H), 6.71 (t, *J* = 7.7 Hz, 1H), 6.53 (d, *J* = 8.1 Hz, 1H), 4.97 (d, *J* = 7.1 Hz, 1H), 4.12 (dd, *J* = 11.6, 7.9 Hz, 1H), 3.86 (dd, *J* = 10.1, 7.4 Hz, 1H), 3.80 (d, *J* = 7.8 Hz, 1H), 3.65 (t, *J* = 11.2 Hz, 1H). <sup>13</sup>C NMR (101 MHz, CDCl<sub>3</sub>) δ 195.8, 177.6, 168.5, 152.4, 149.6, 138.4, 136.2, 132.4, 130.9, 129.8, 128.6, 128.5, 128.2, 127.9, 127.0, 126.8, 124.3, 124.2, 119.0, 117.8, 116.0, 115.5, 58.0, 54.2, 54.1, 45.1, 44.6. HRMS (ESI) calcd for C<sub>32</sub>H<sub>22</sub>BrNO<sub>6</sub>SNa<sup>+</sup> [M+Na]<sup>+</sup> 650.0243 found 650.0243.

**1-(2,2-dioxidobenzo[*e*][1,2,3]oxathiazin-4-yl)-3-(4-methylbenzoyl)-2-phenyl-1,3,3a,9b-tetrahydrocyclopenta[*c*]chromen-4(2*H*)-one (3am)**

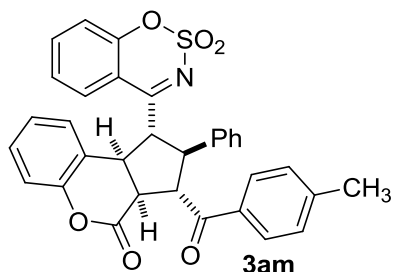

Orange solid (80%, 45.1mg), mp = 185 – 187 °C. <sup>1</sup>H NMR (400 MHz, CDCl<sub>3</sub>) δ 7.65 (d, *J* = 8.0 Hz, 2H), 7.36 (t, *J* = 7.8 Hz, 1H), 7.16 – 6.99 (m, 11H), 6.87 (t, *J* = 7.5 Hz, 1H), 6.69 (t, *J* = 7.7 Hz, 1H), 6.52 (d, *J* = 8.0 Hz, 1H), 5.01 (d, *J* = 6.9 Hz, 1H), 4.14 (dd, *J* = 11.8, 7.8 Hz, 1H), 3.90 (dd, *J* = 10.4, 7.0 Hz, 1H), 3.78 (d, *J* = 7.8 Hz, 1H), 3.64 (t, *J* = 11.2 Hz, 1H), 2.26 (s, 3H). <sup>13</sup>C NMR (101 MHz, CDCl<sub>3</sub>) δ 196.4, 177.8, 168.6, 152.4, 149.7, 143.8, 138.7, 136.1, 131.2, 128.5, 128.4, 128.3, 128.3, 128.0, 126.9, 126.9, 126.8, 124.2, 124.2, 119.2, 117.7, 115.9, 115.6, 58.1, 54.4, 53.9, 45.1, 44.9, 20.6. HRMS (ESI) calcd for C<sub>33</sub>H<sub>25</sub>NO<sub>6</sub>SNa<sup>+</sup> [M+Na]<sup>+</sup> 586.1295 found 586.1296.

**3-benzoyl-8-bromo-1-(1,1-dioxidobenzo[*d*]isothiazol-3-yl)-2-phenyl-1,3,3a,9b-tetrahydrocyclopenta[*c*]chromen-4(2*H*)-one (5)**

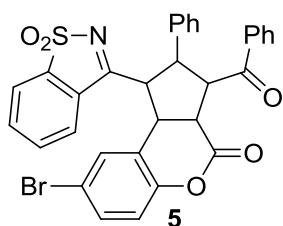

White solid (85%, 52.1mg), mp = 212 – 214 °C. <sup>1</sup>H NMR (400 MHz, CDCl<sub>3</sub>) δ 7.73 (d, *J* = 7.8 Hz, 2H), 7.69 (d, *J* = 7.5 Hz, 1H), 7.49 – 7.36 (m, 3H), 7.32 – 7.20 (m, 3H), 7.20 – 7.13 (m, 3H), 7.13 – 7.04 (m, 3H), 6.90 (d, *J* = 8.7 Hz, 1H), 6.20 (d, *J* = 7.8 Hz, 1H), 5.04 (d, *J* = 6.6 Hz, 1H), 4.19 (dd, *J* = 11.9, 7.9 Hz, 1H), 3.90 – 3.68 (m, 2H), 3.44 (t, *J* = 11.3 Hz, 1H). <sup>13</sup>C NMR (101 MHz, CDCl<sub>3</sub>) δ 196.4, 173.7, 167.9, 148.8, 138.9, 138.7, 133.5, 132.9, 132.7, 132.2, 131.6, 131.5, 129.3, 128.5, 128.3, 127.6, 127.1, 127.1, 123.2, 121.5, 121.4, 117.6, 116.7, 55.5, 54.5, 54.1, 44.5, 43.4. HRMS (ESI) calcd for C<sub>32</sub>H<sub>22</sub>BrNO<sub>5</sub>SNa<sup>+</sup> [M+Na]<sup>+</sup> 634.0294, found 634.0893.

## Further Transformation of 3aa

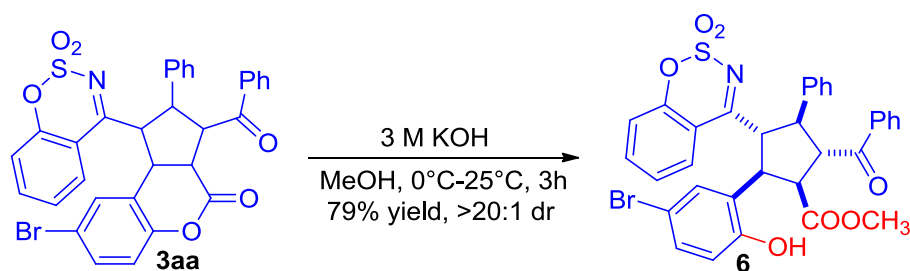

The compound **3aa** (62.8 mg, 0.1 mmol) was dissolved in 1 mL MeOH, and 5  $\mu$ L 3M KOH until pH was 9, then the reaction mixture was stirred for 3 h at room temperature. The solvent was removed and the crude product was purified through silica gel (petroleum ether/EtOAc 2:1) to afford the desired product **6**.

### methyl

### 2-benzoyl-5-(5-bromo-2-hydroxyphenyl)-4-(2,2-dioxidobenzo[*e*][1,2,3]oxathiazin-4-yl)-3-phenyl cyclopentanecarboxylate (**6**)

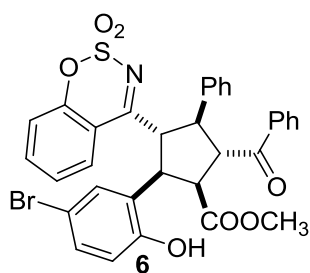

White solid (79%, 52.2mg), mp = 98 – 100 °C.  $^1\text{H}$  NMR (400 MHz,  $\text{CDCl}_3$ )  $\delta$  7.65 (d,  $J$  = 7.8 Hz, 2H), 7.49 – 7.33 (m, 4H), 7.22 (t,  $J$  = 7.8 Hz, 3H), 7.14 – 6.97 (m, 5H), 6.99 – 6.87 (m, 2H), 6.56 (d,  $J$  = 8.5 Hz, 1H), 6.38 (s, 1H), 4.85 (dd,  $J$  = 9.3, 4.9 Hz, 1H), 4.74 (t,  $J$  = 11.0 Hz, 1H), 4.52 (t,  $J$  = 10.4 Hz, 1H), 3.99 – 3.81 (m, 2H), 3.32 (s, 3H).  $^{13}\text{C}$  NMR (101 MHz,  $\text{CDCl}_3$ )  $\delta$  198.4, 179.9, 174.1, 152.4, 152.2, 138.2, 136.0, 134.9, 132.5, 130.5, 129.5, 128.1, 127.7, 127.5, 127.1, 126.8, 126.8, 124.9, 124.5, 117.7, 116.6, 115.7, 111.2, 55.4, 53.9, 52.9, 51.1, 49.7, 47.1. HRMS (ESI) calcd for  $\text{C}_{33}\text{H}_{26}\text{BrNO}_7\text{SNa}^+$   $[\text{M}+\text{Na}]^+$  682.0506, found 682.1152.

## References

1. (a) X. Feng, Z. Zhou, C. Ma, X. Yin, R. Li, Y.-C. Chen. *Angew. Chem. Int. Ed.* **2013**, *52*, 14173. (b) C. Ma, J. Gu, B. Teng, Q. Zhou, R. Li, Y.-C. Chen. *Org. Lett.* **2013**, *15*, 6206. (c) Y. Wu, Y. Liu, W. Yang, H. Liu, L. Zhou, Z. Sun, H. Guo. *Adv. Synth. Catal.* **2016**, *358*, 3517. (d) Q. An, J. Shen, N. Butt, D. Liu, Y. Liu, W. Zhang. *Adv. Synth. Catal.* **2015**, *357*, 3627.
2. Y.-R. Chen, M. R. Ganapuram, K.-H. Hsieh, K.-H. Chen, P. Karanam, S. S. Vagh, Y.-C. Liou and W. Lin, *Chem. Commun.*, 2018, **54**, 12702.

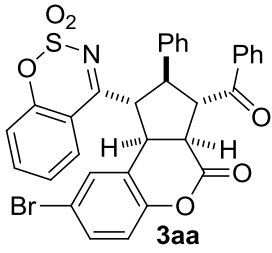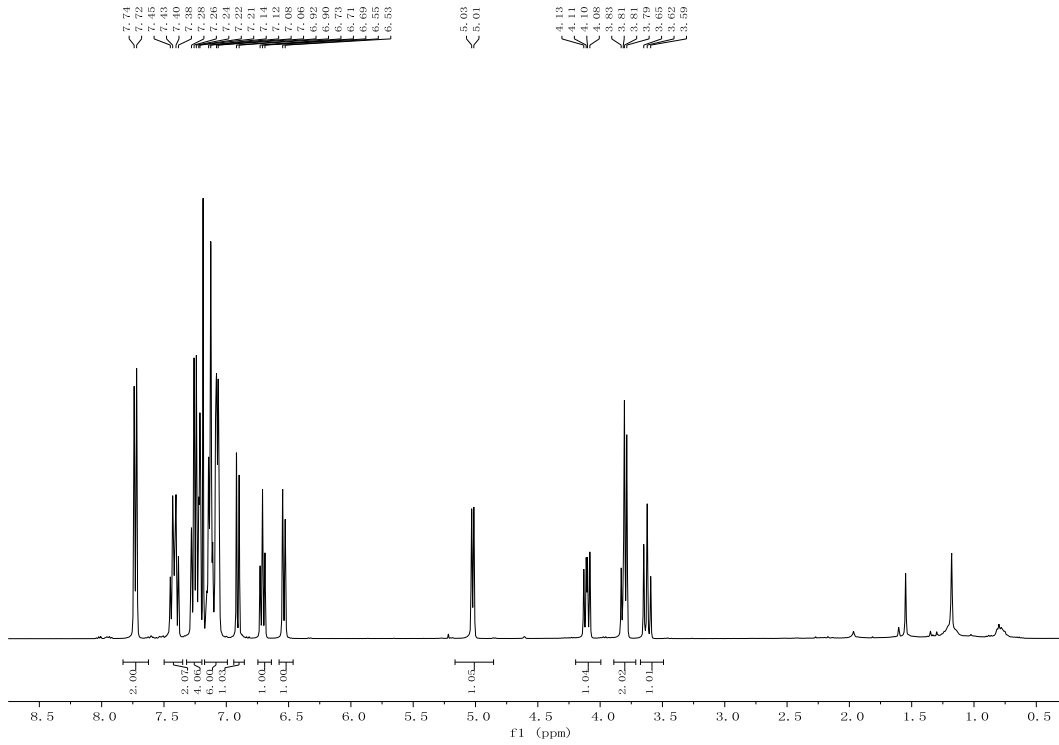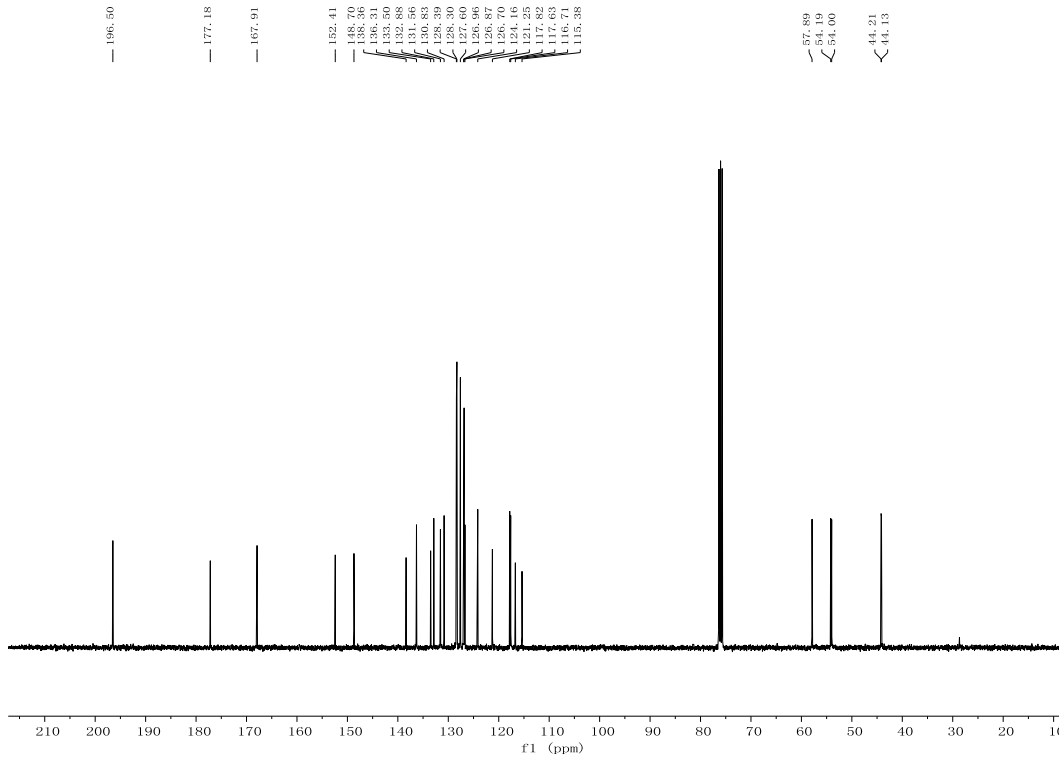

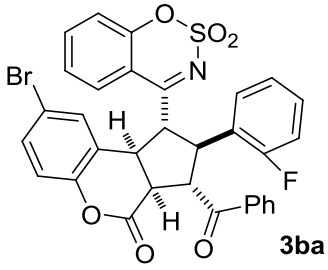

7.81  
7.79  
7.78  
7.44  
7.42  
7.42  
7.28  
7.28  
7.24  
7.24  
7.22  
7.11  
7.09  
7.06  
7.06  
6.93  
6.92  
6.90  
6.89  
6.88  
6.80  
6.78  
5.07  
5.05  
4.11  
4.09  
4.07  
4.07  
4.04  
3.96  
3.94  
3.77  
3.75

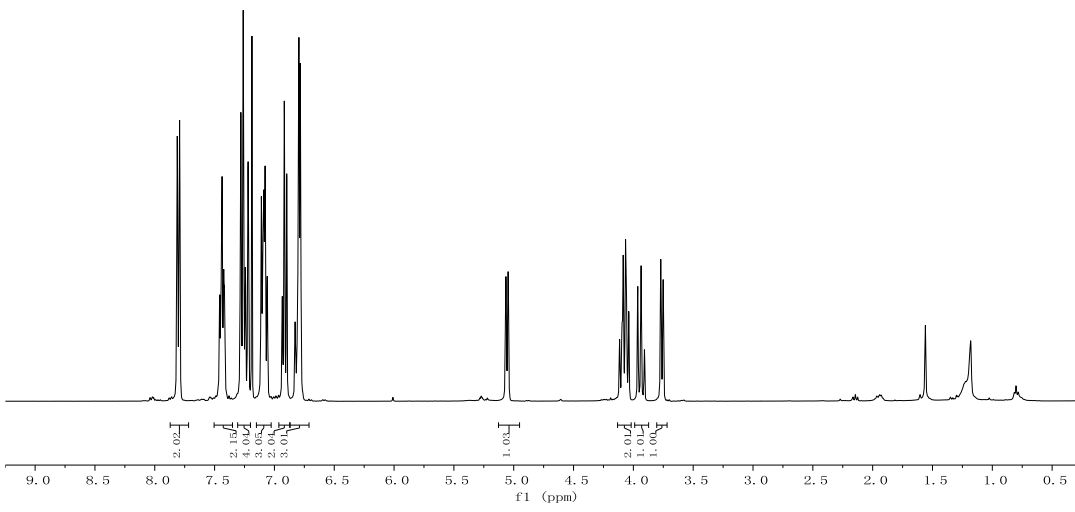

196.52  
177.03  
167.51  
166.98  
158.33  
152.47  
148.95  
148.45  
133.72  
132.88  
131.61  
130.67  
129.41  
128.96  
128.88  
128.85  
127.65  
126.31  
124.85  
124.72  
124.62  
124.16  
124.13  
121.03  
117.94  
117.59  
116.75  
116.64  
115.42  
115.08  
113.86  
54.73  
52.91  
48.44  
43.97  
43.86

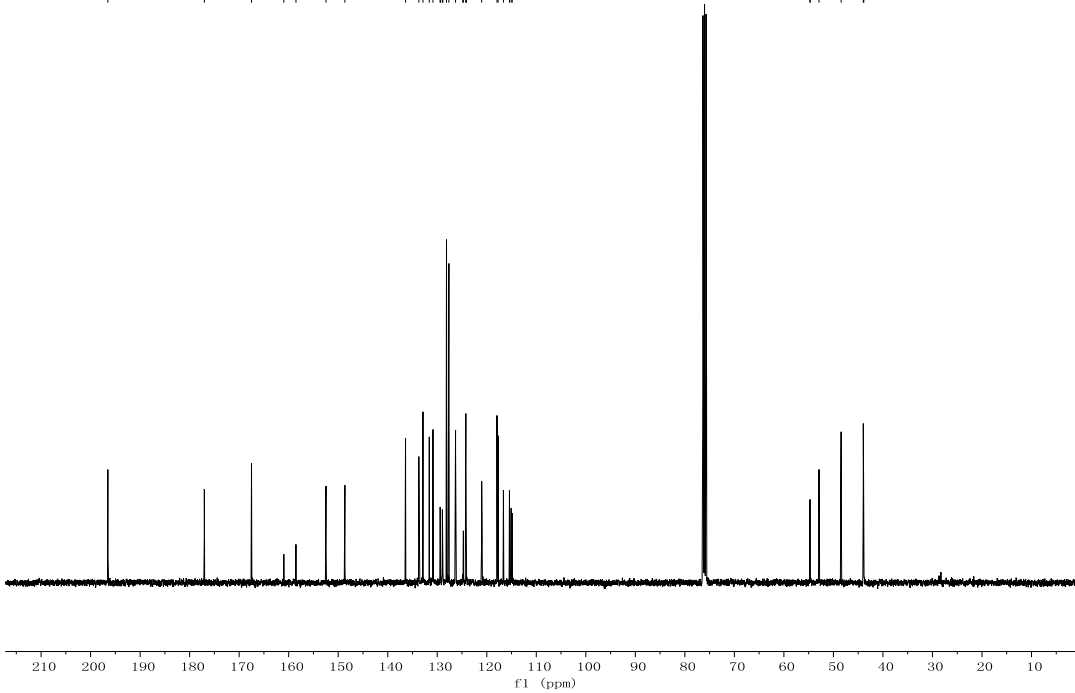



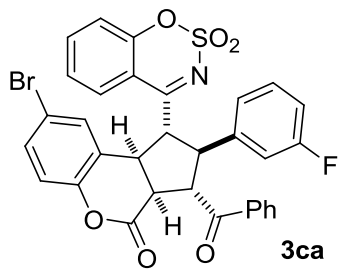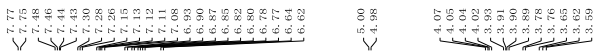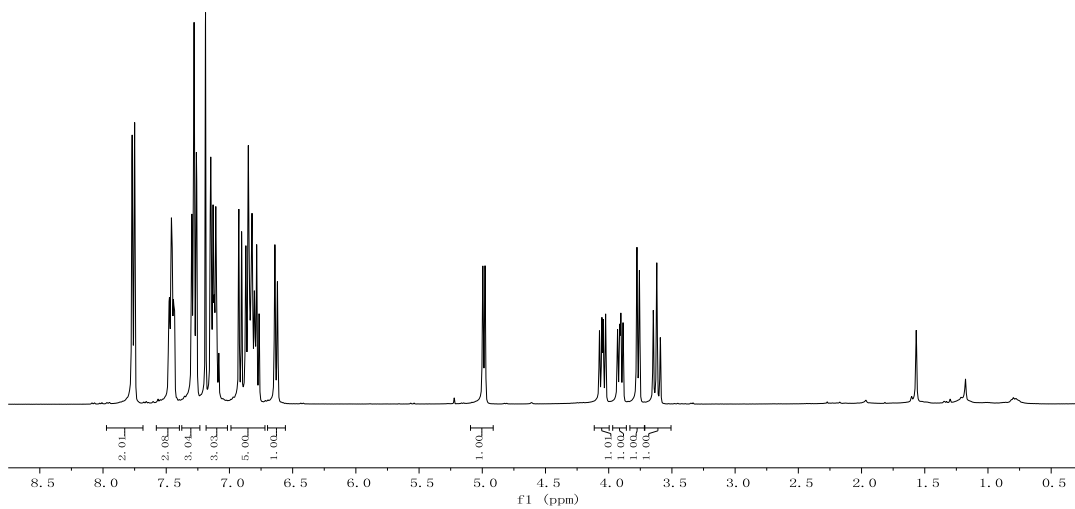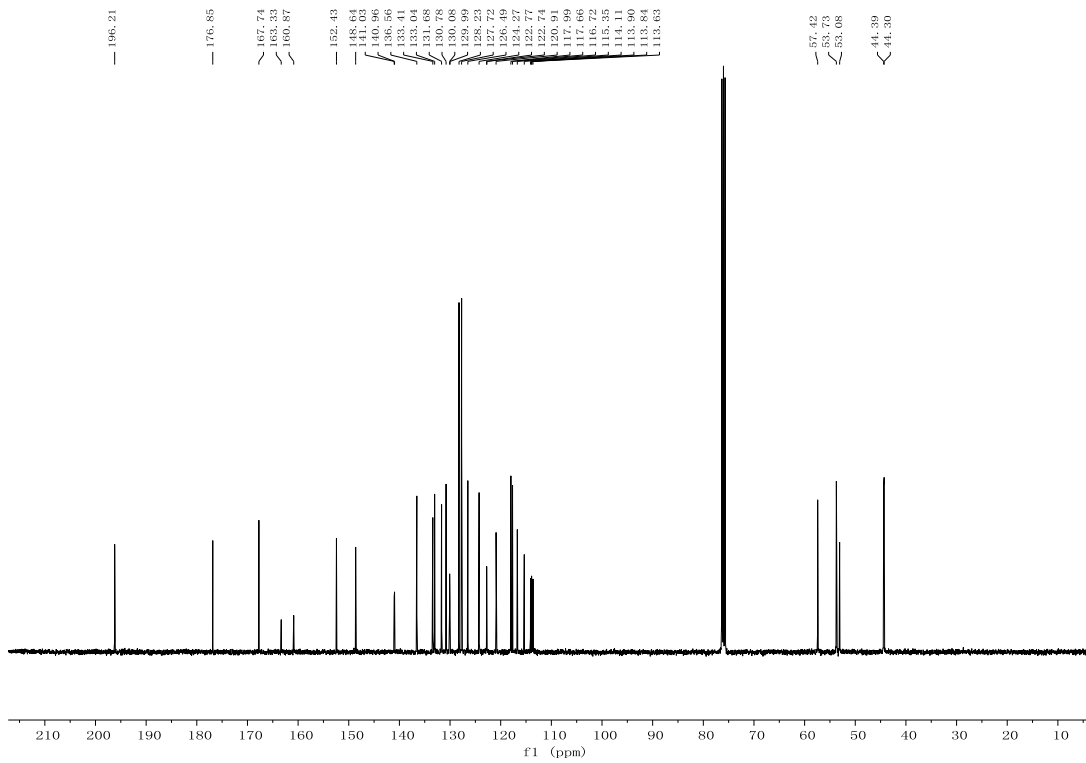

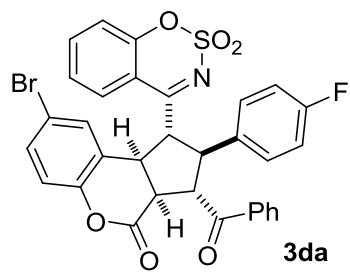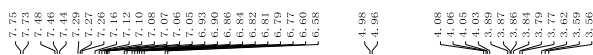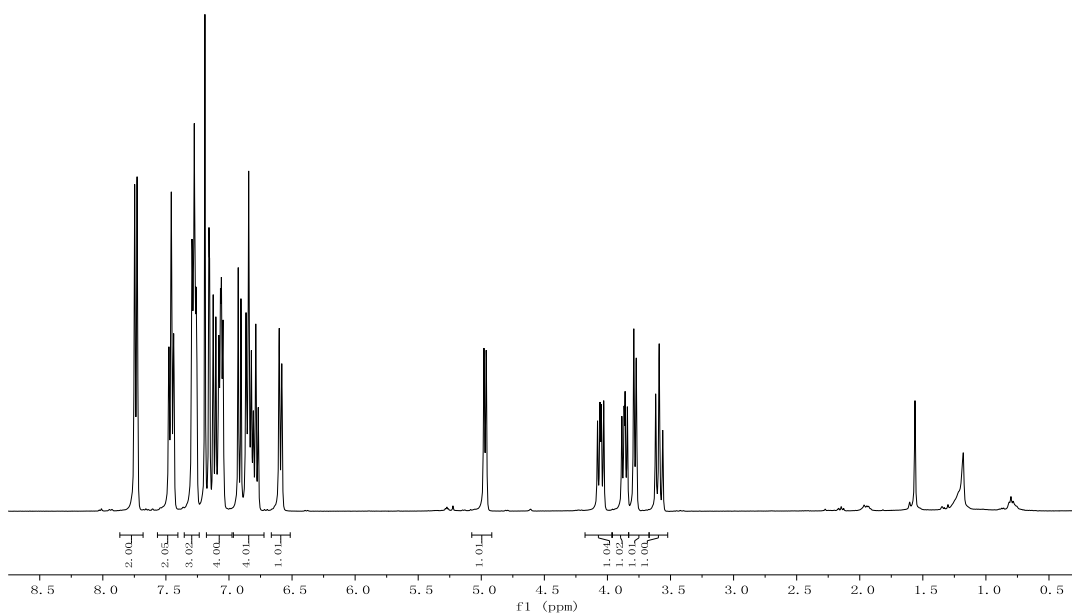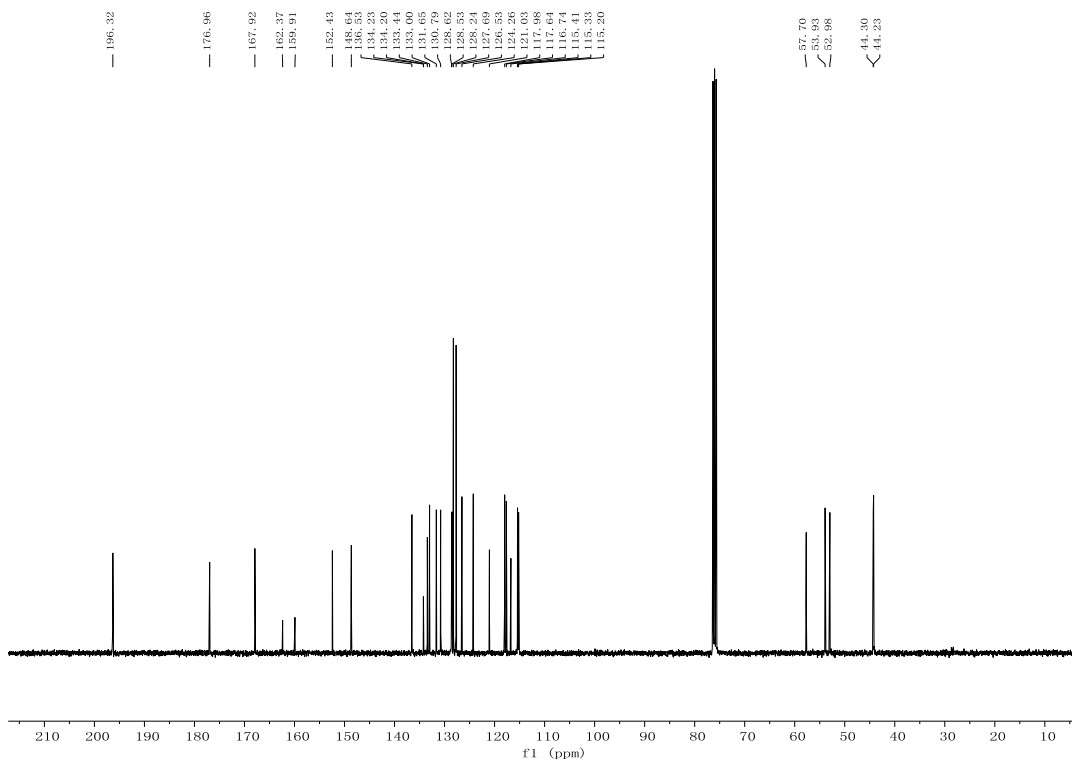

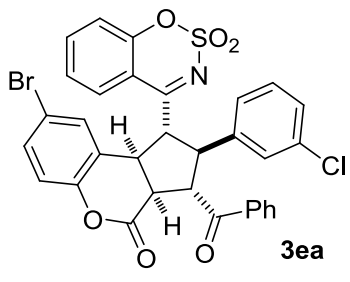

7.78  
7.76  
7.74  
7.47  
7.46  
7.44  
7.31  
7.27  
7.15  
7.14  
7.12  
7.07  
6.99  
6.97  
6.93  
6.91  
6.89  
6.79  
6.77  
6.65  
6.63

4.98  
4.96

4.06  
4.04  
4.03  
4.01  
3.99  
3.90  
3.89  
3.77  
3.75  
3.64  
3.61  
3.59

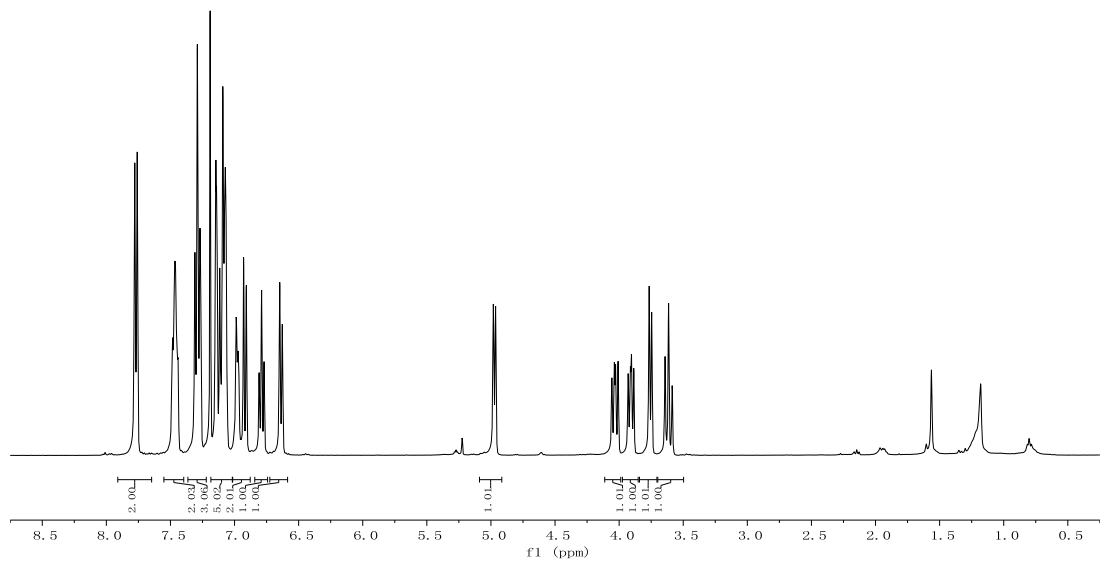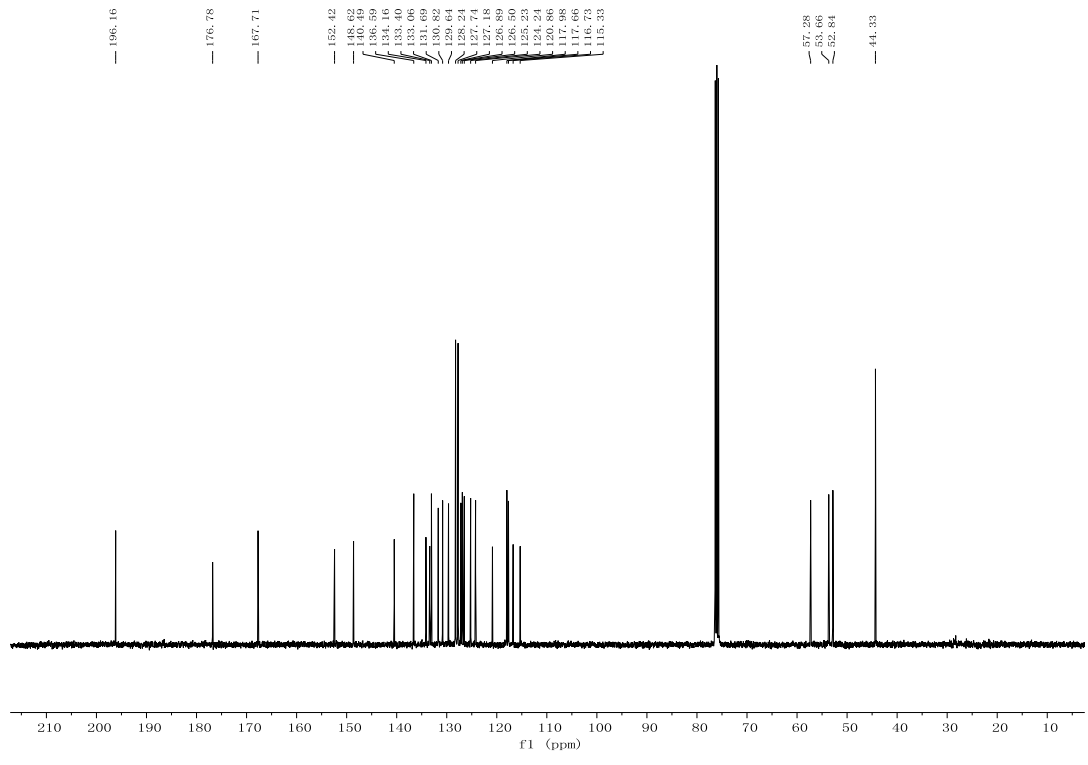

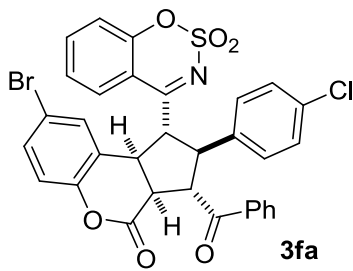

7.76  
7.74  
7.49  
7.45  
7.45  
7.31  
7.29  
7.27  
7.27  
7.12  
7.05  
7.03  
6.93  
6.81  
6.81  
6.79  
6.78  
6.69  
6.59  
4.97  
4.95  
4.06  
4.04  
4.03  
3.91  
3.91  
3.89  
3.89  
3.87  
3.77  
3.61  
3.58  
3.55

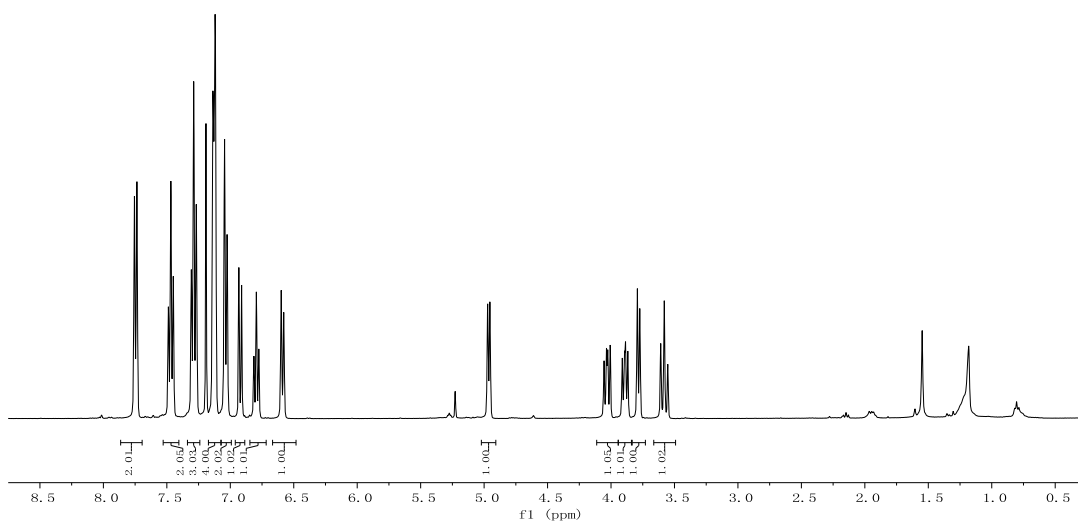

196.25  
176.81  
167.85  
152.44  
148.62  
148.57  
136.59  
133.41  
133.04  
132.83  
132.69  
130.77  
128.52  
128.26  
128.23  
128.23  
126.47  
124.29  
124.93  
118.02  
116.66  
116.75  
113.33  
57.25  
52.81  
44.54  
44.32

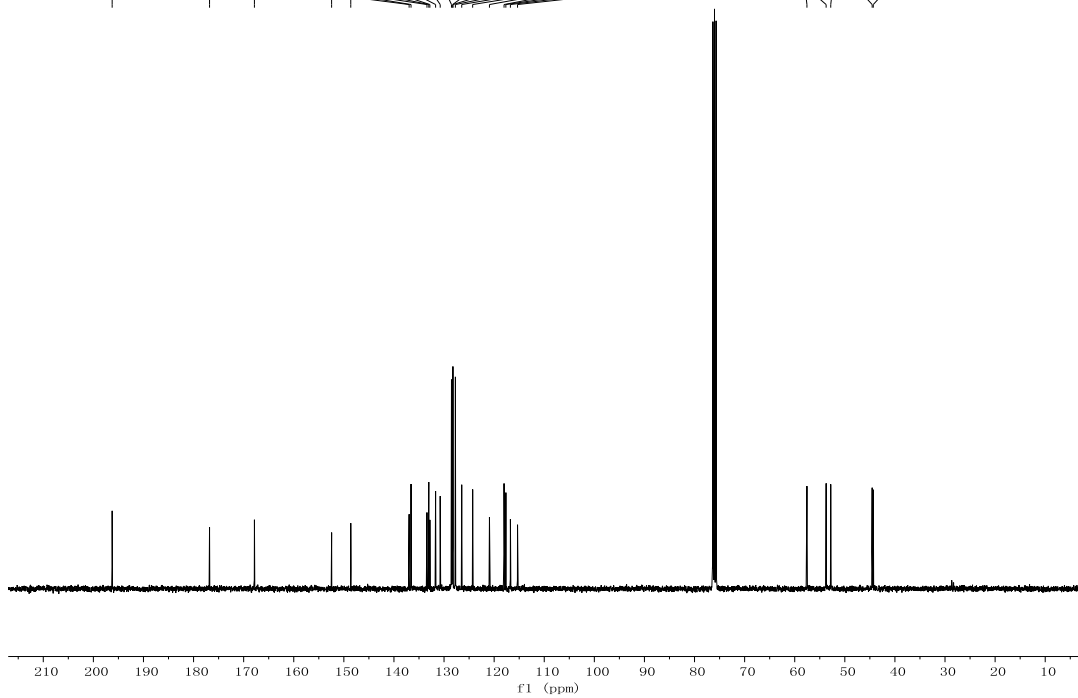

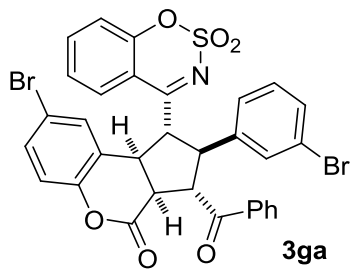

7.79  
7.74  
7.49  
7.47  
7.47  
7.32  
7.30  
7.28  
7.27  
7.24  
7.24  
7.20  
7.16  
7.13  
7.13  
7.03  
7.02  
6.93  
6.91  
6.91  
6.79  
6.77  
6.65  
6.63  
4.98  
4.96  
4.06  
4.01  
4.01  
3.96  
3.96  
3.90  
3.89  
3.87  
3.75  
3.63  
3.61  
3.58

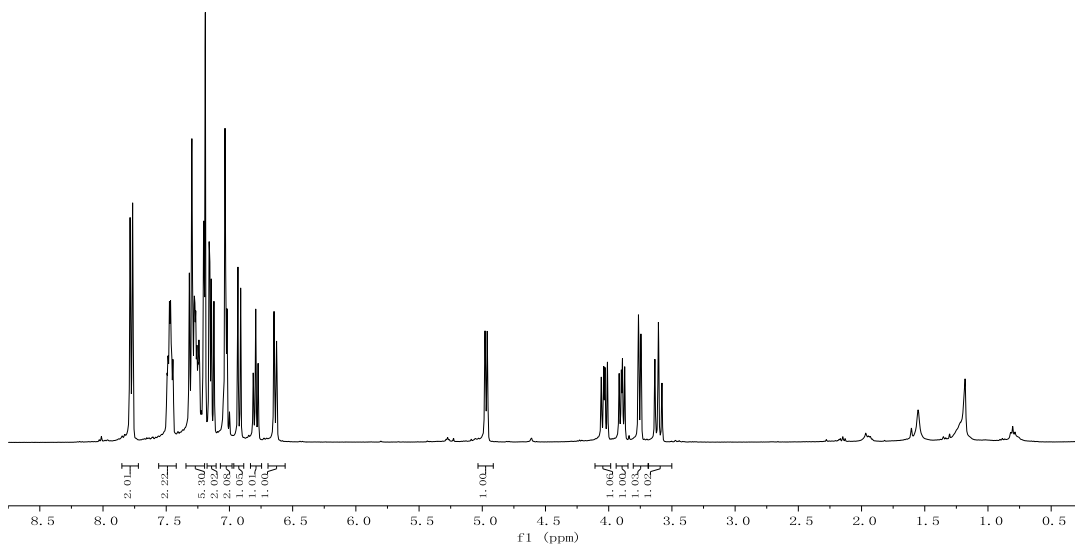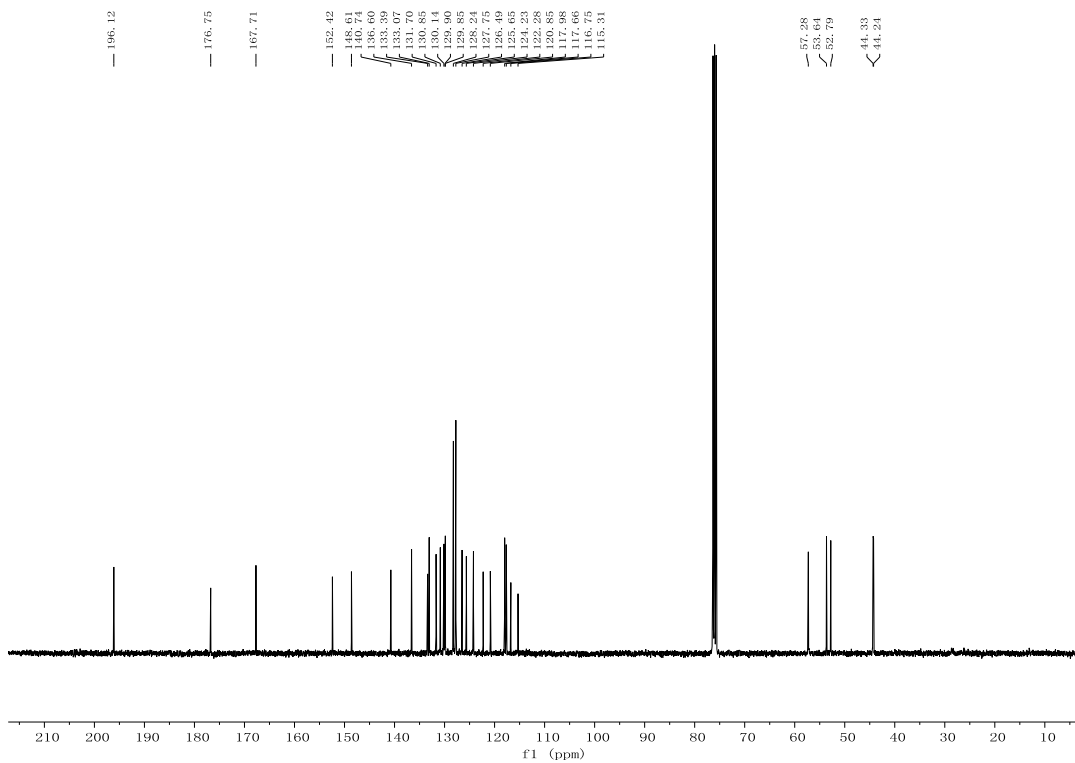





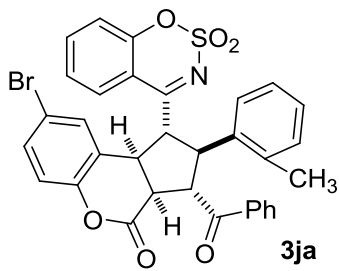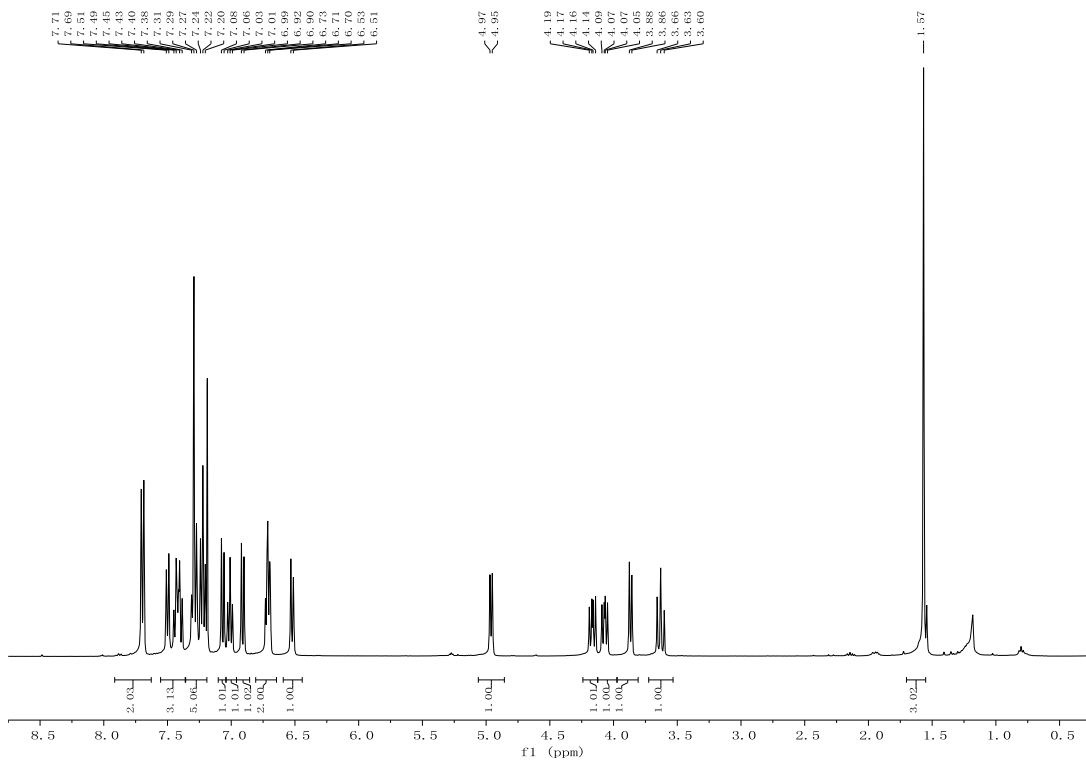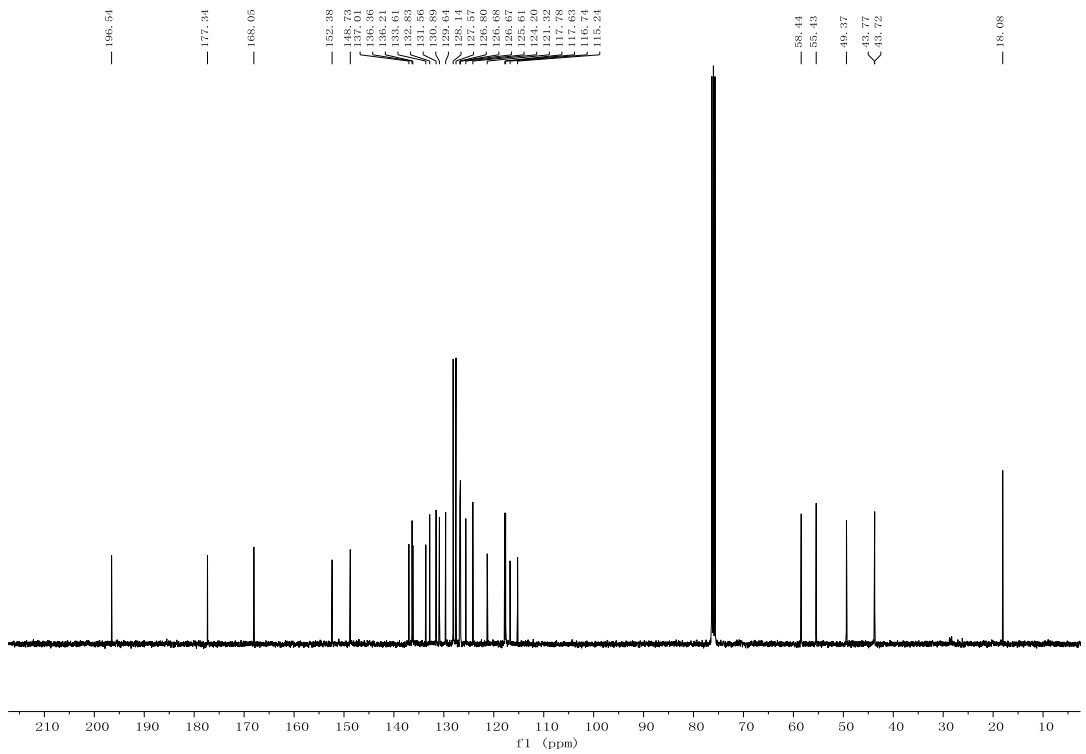



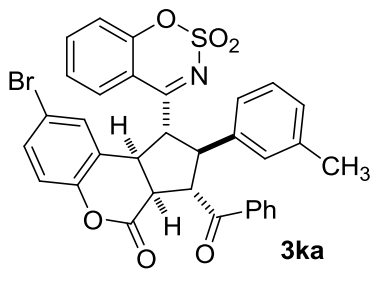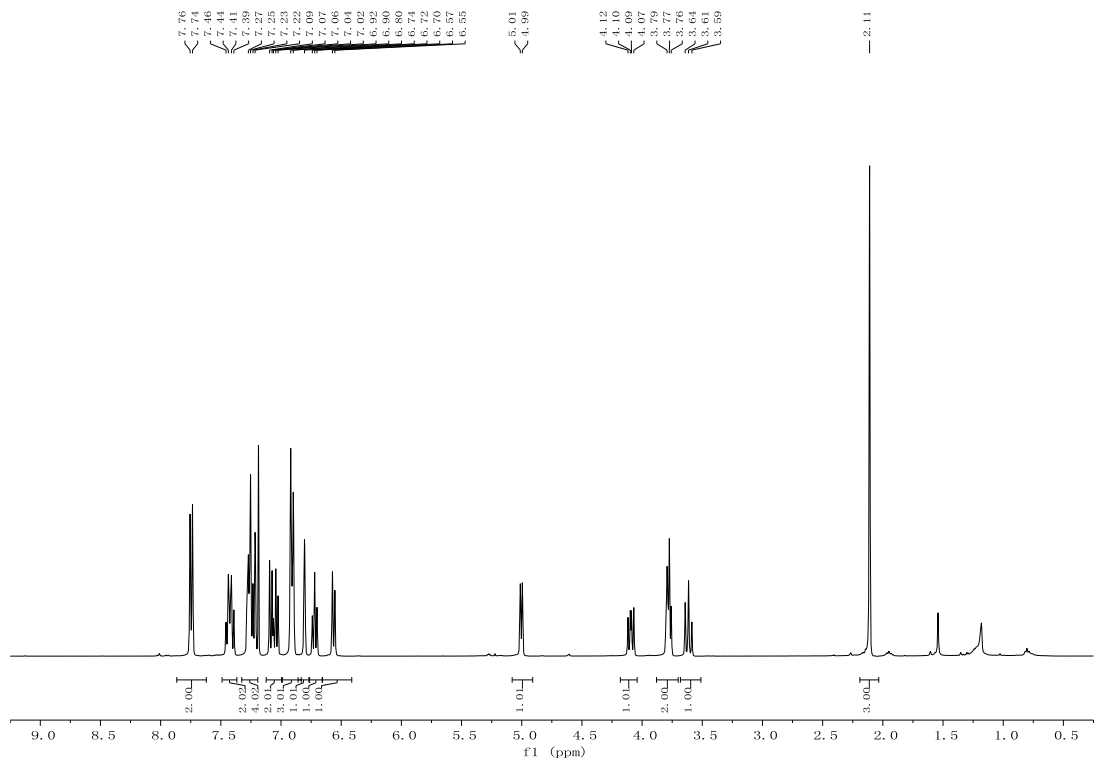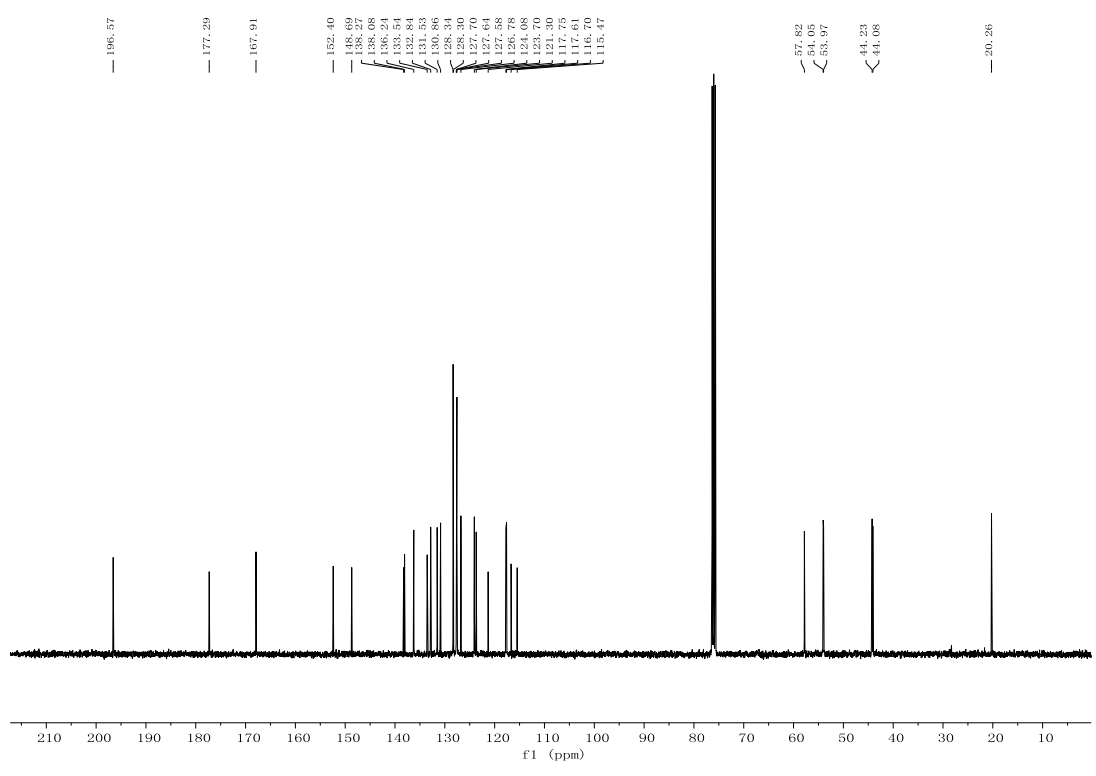

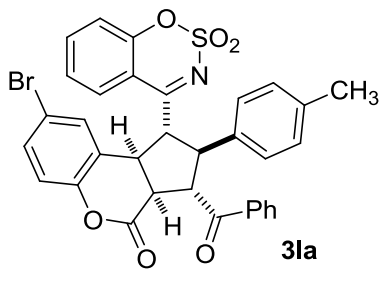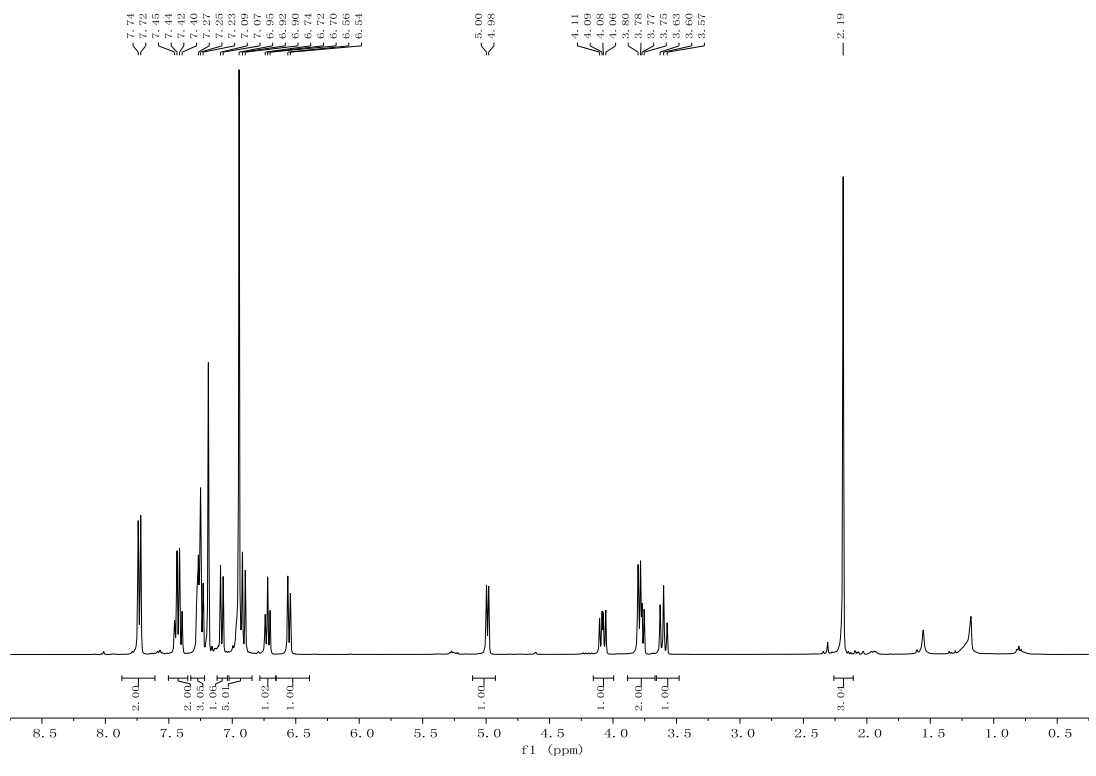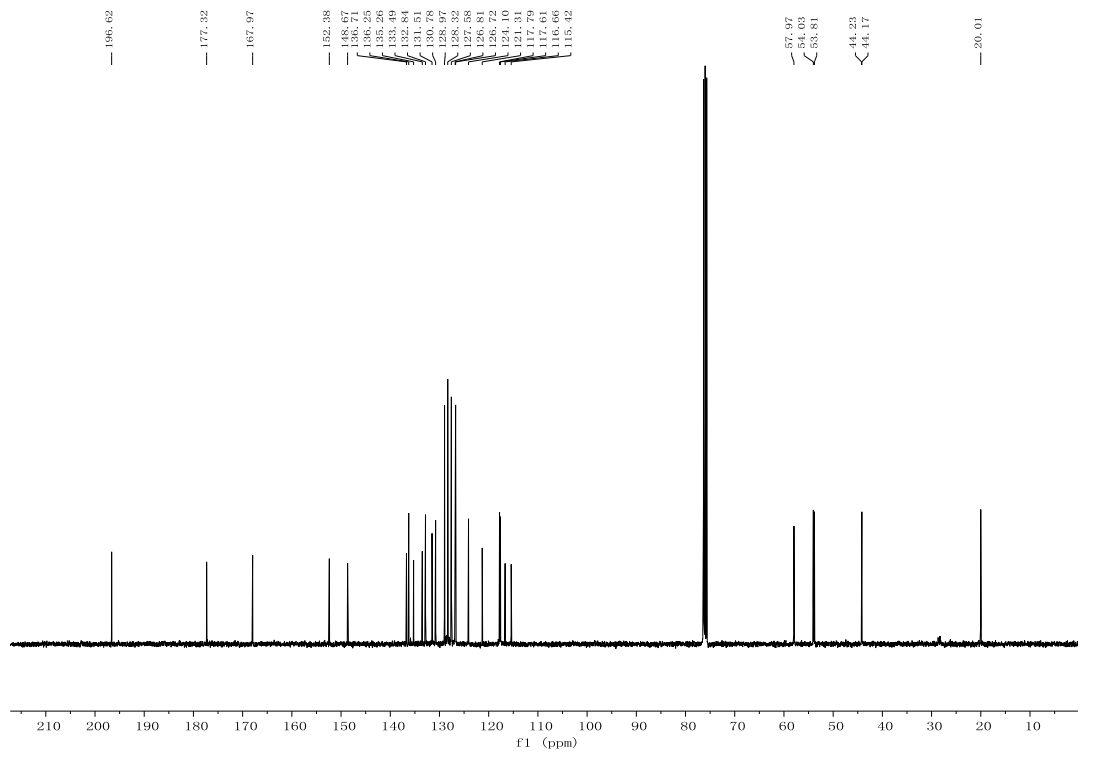

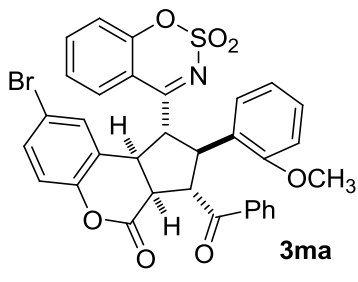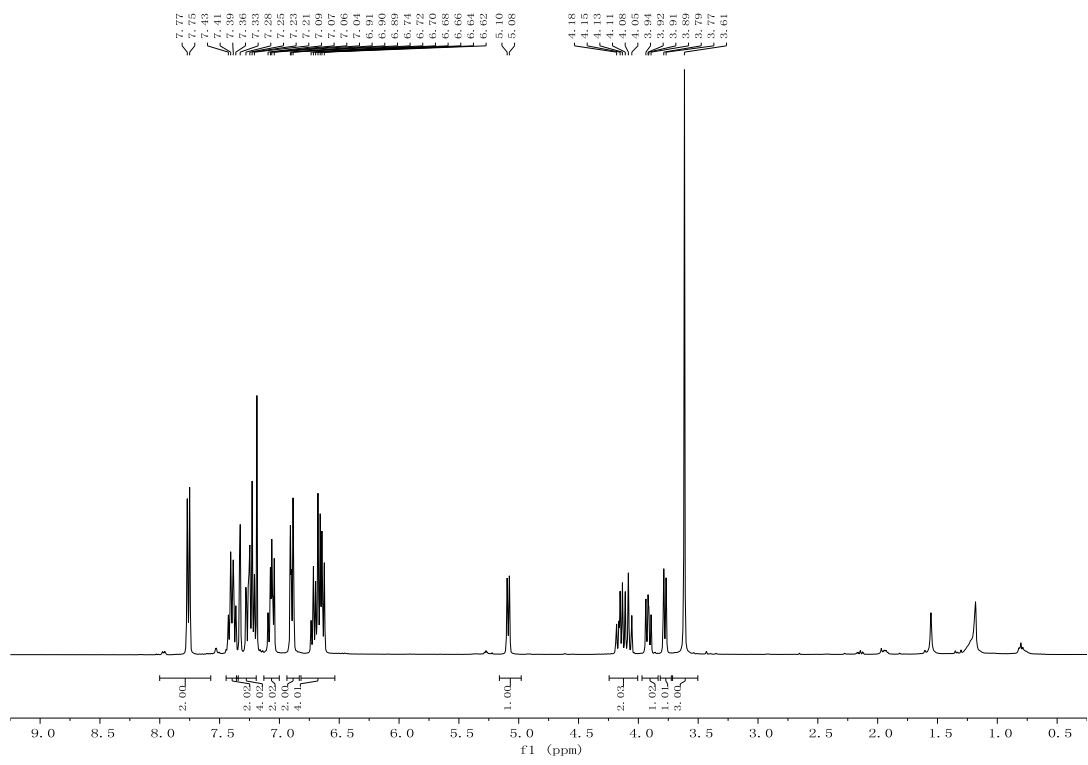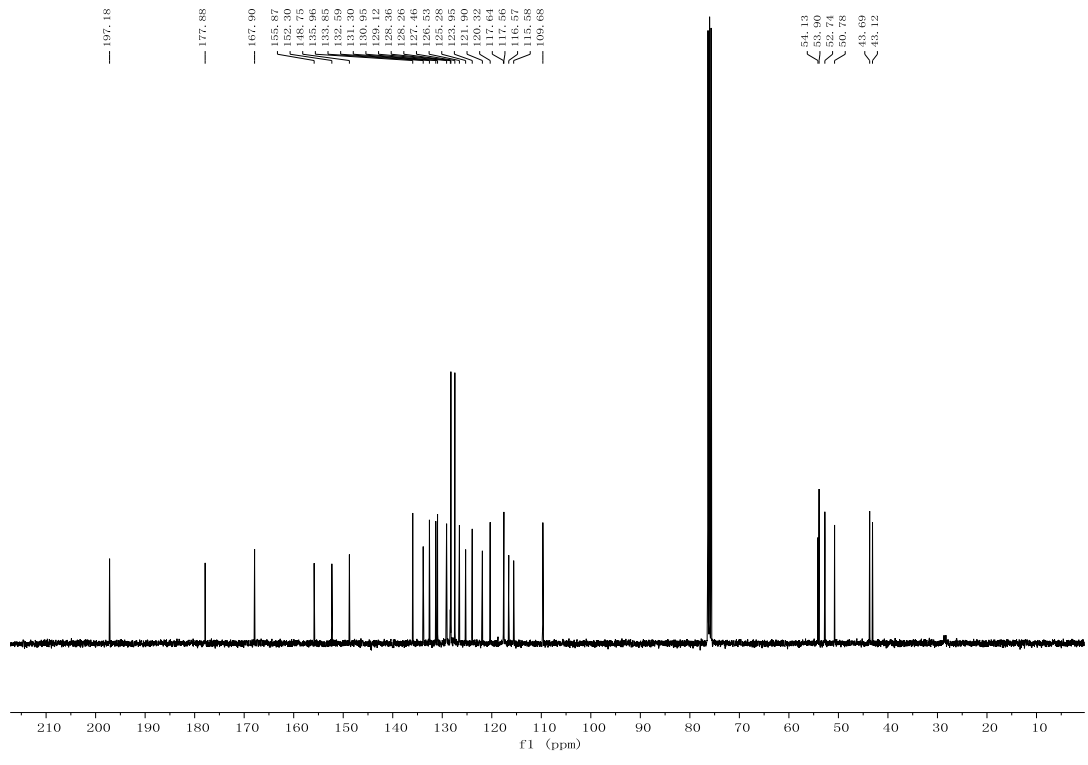

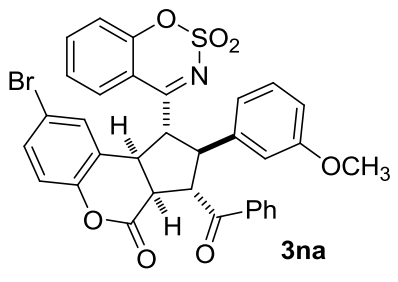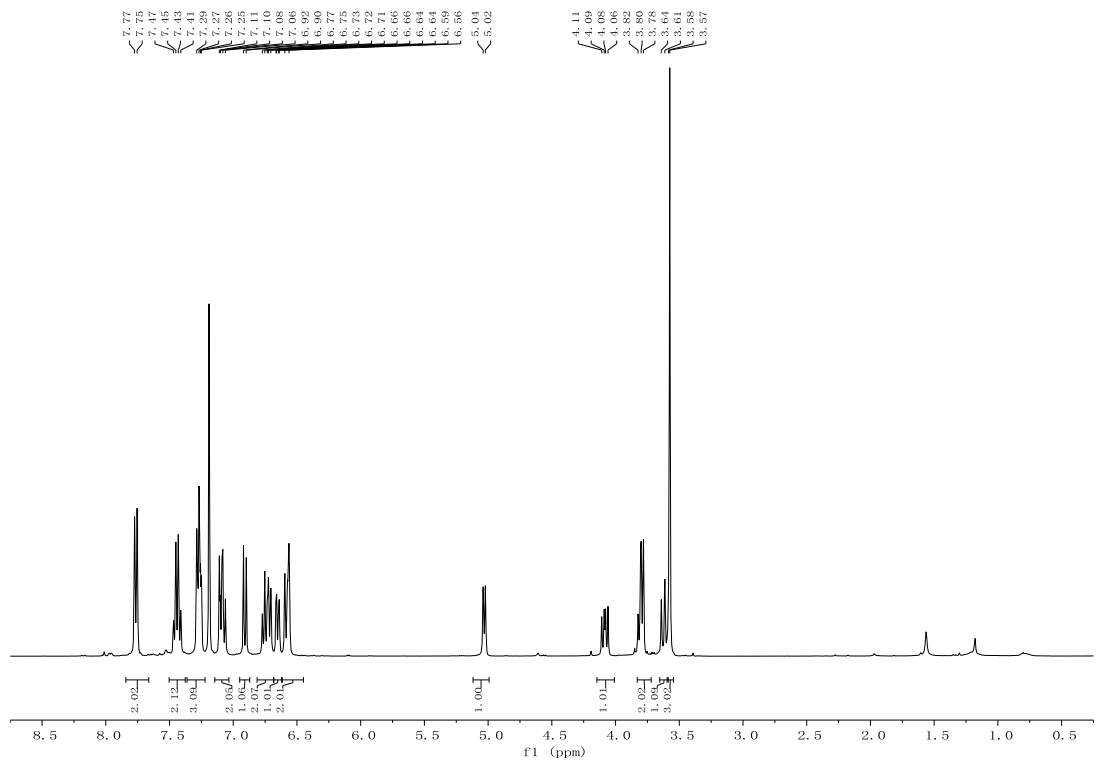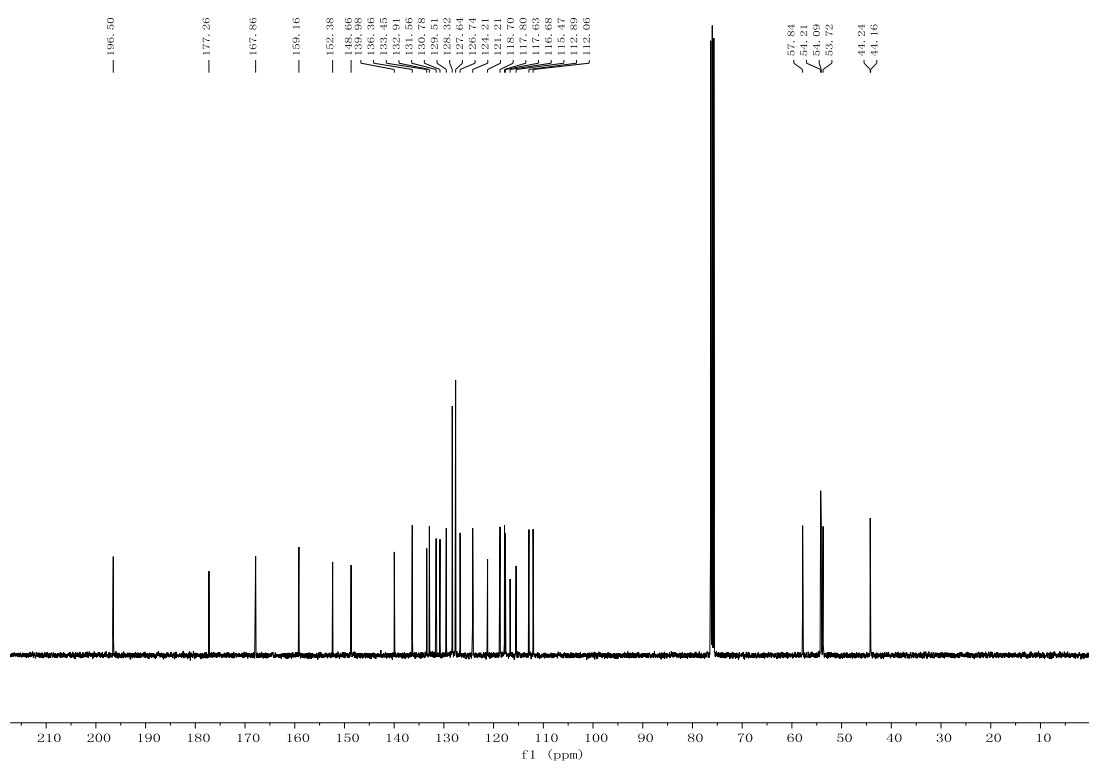



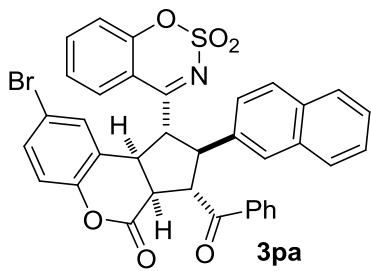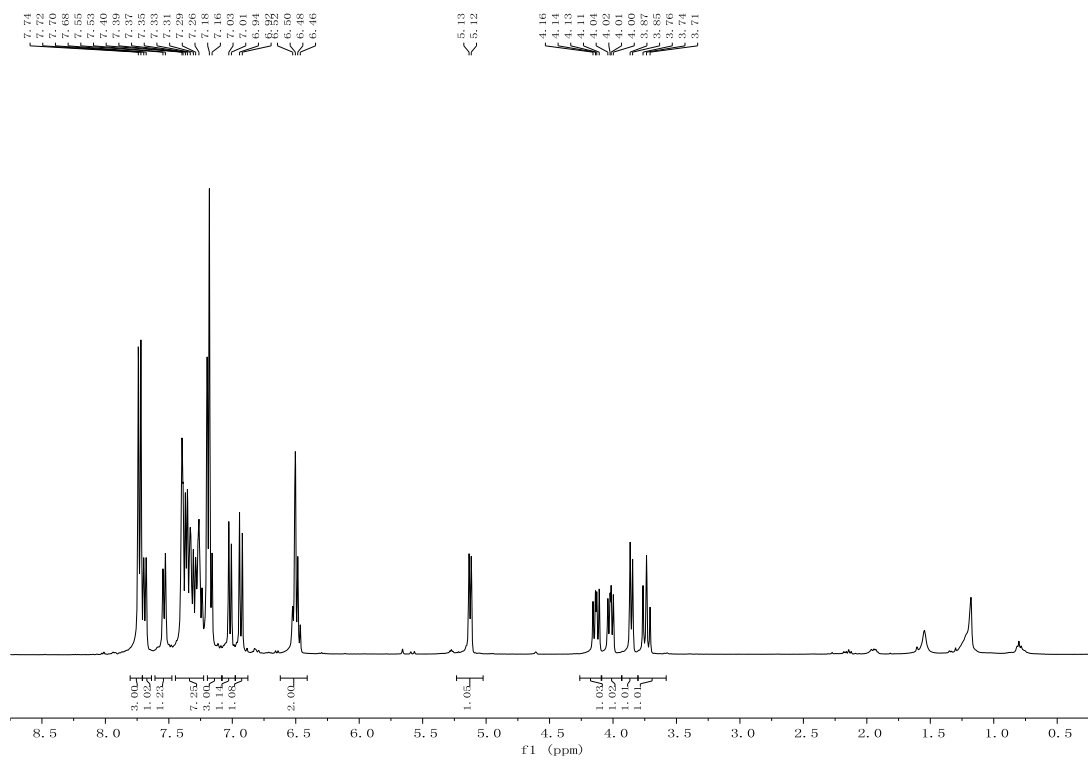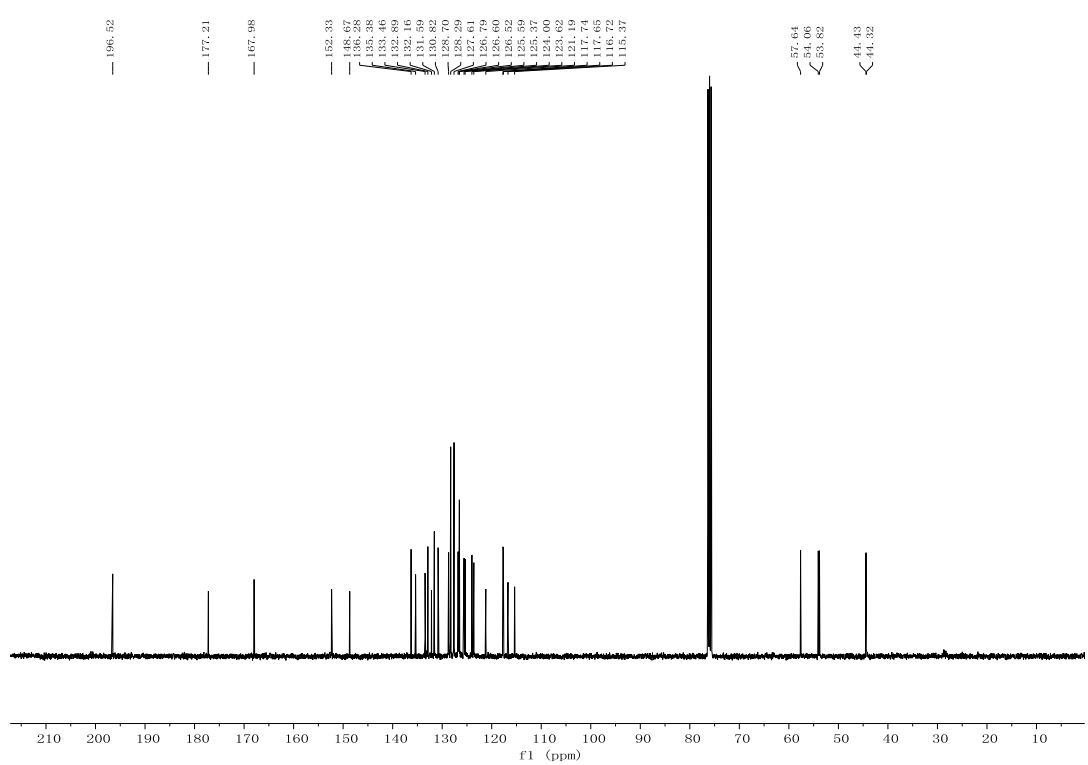

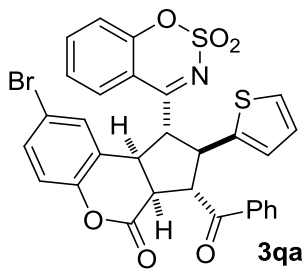

7.89  
7.87  
7.80  
7.48  
7.45  
7.43  
7.33  
7.31  
7.28  
7.26  
7.24  
7.13  
7.06  
7.04  
6.92  
6.89  
6.88  
6.86  
6.84  
6.81  
6.78  
6.76  
6.72  
6.70  
5.06  
5.04  
4.29  
4.28  
4.27  
4.26  
4.08  
4.06  
4.05  
4.03  
3.71  
3.70  
3.69  
3.67

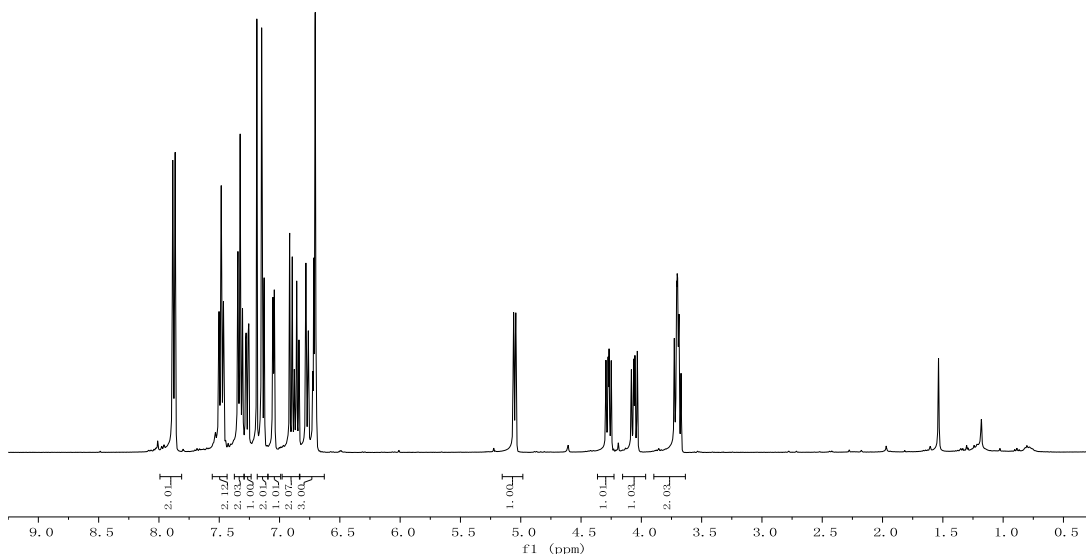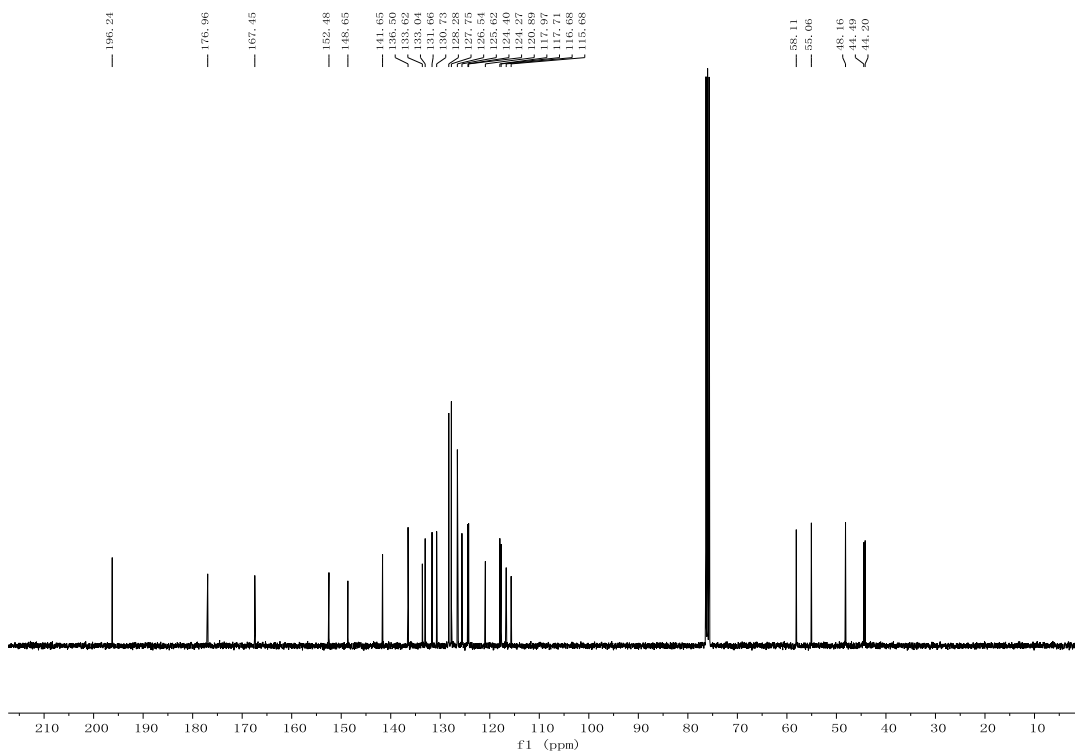

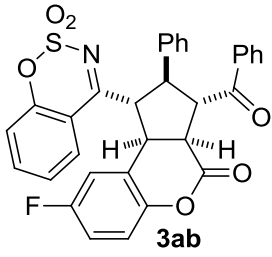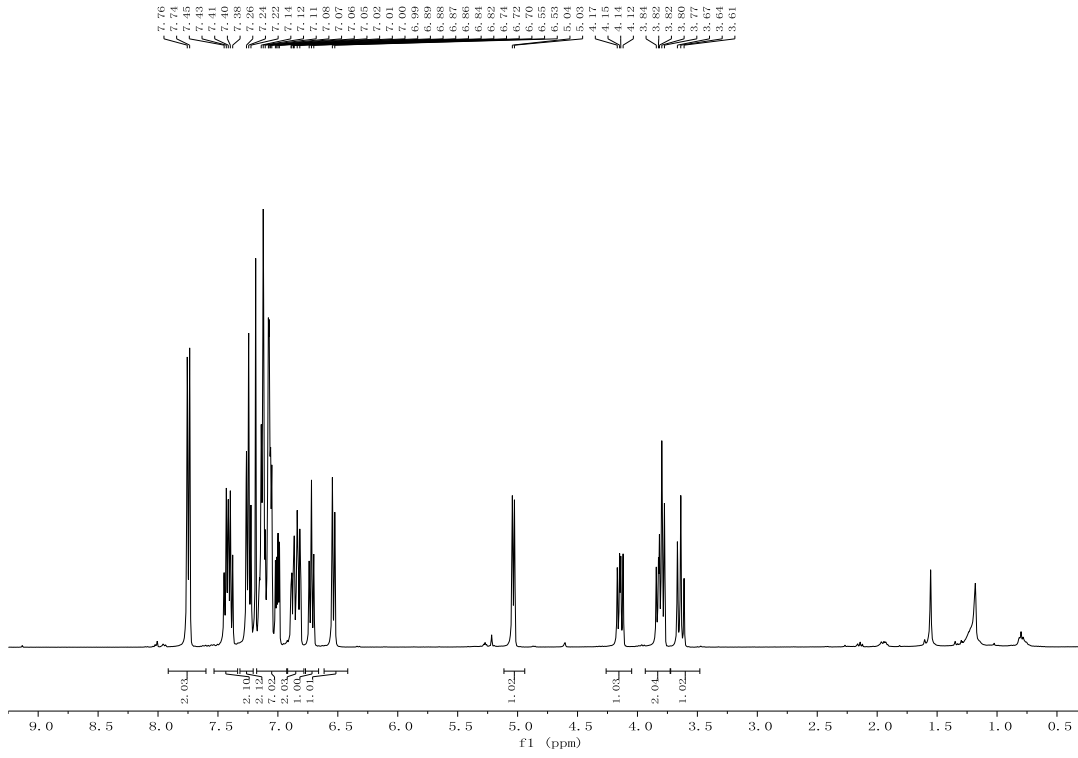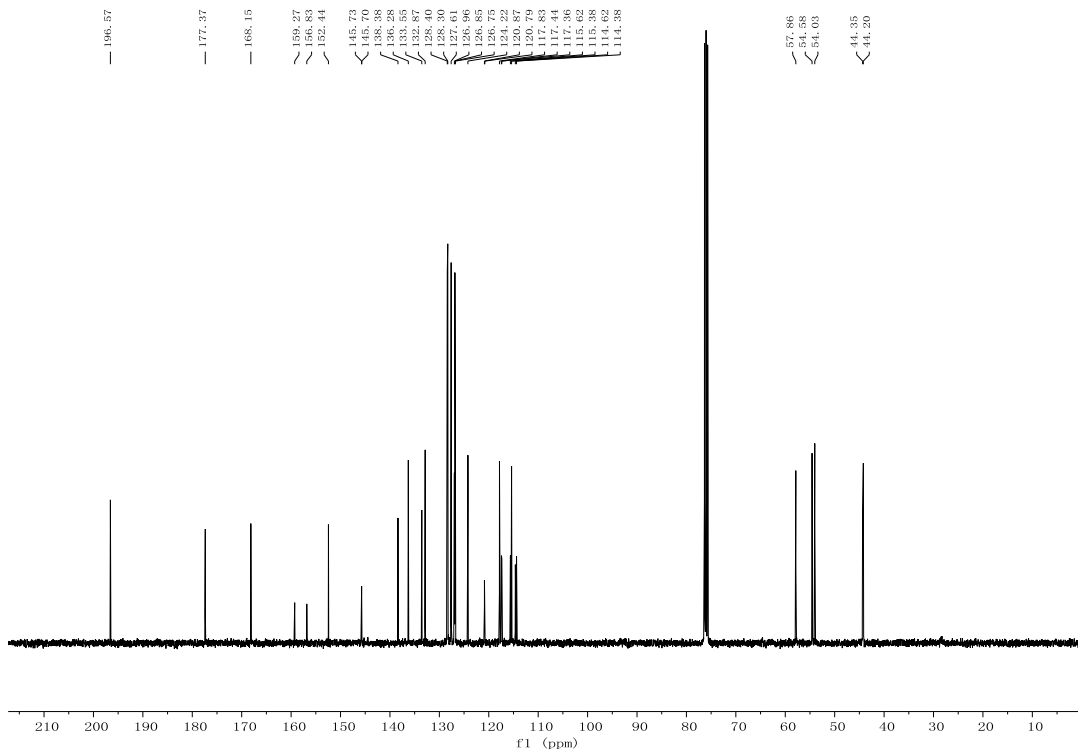







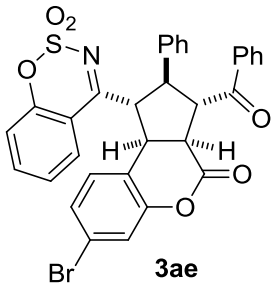

7.75  
7.73  
7.45  
7.43  
7.41  
7.40  
7.38  
7.26  
7.24  
7.23  
7.14  
7.12  
7.11  
7.08  
7.04  
7.00  
6.99  
6.97  
6.74  
6.72  
6.53  
6.51  
5.04  
5.02  
4.19  
4.17  
4.15  
4.15  
3.83  
3.81  
3.79  
3.79  
3.64  
3.61  
3.58

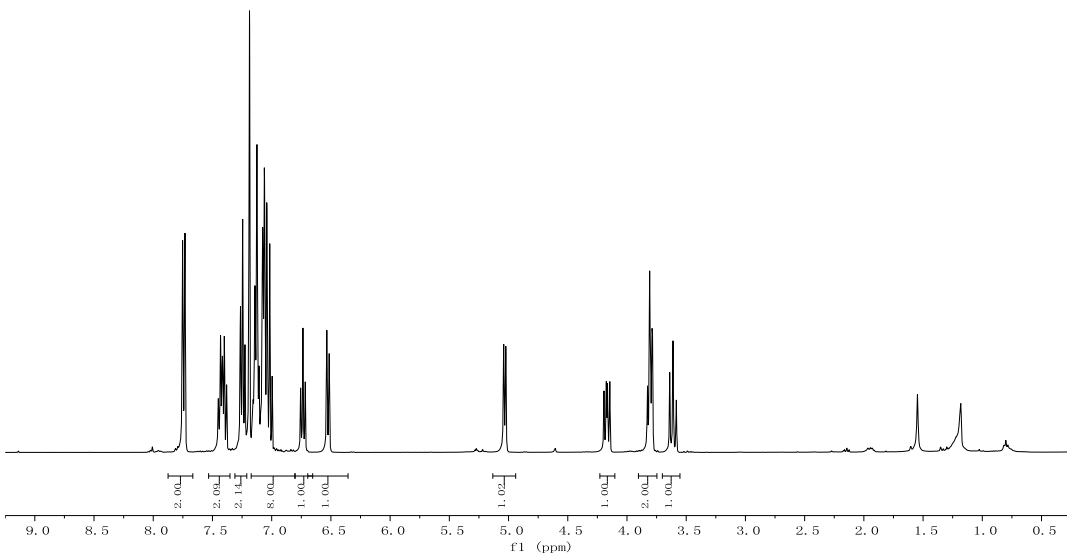

196.51  
177.44  
167.87  
152.41  
138.31  
137.88  
133.54  
132.88  
129.19  
138.42  
138.42  
137.62  
127.34  
126.97  
126.82  
126.82  
121.52  
119.23  
118.27  
117.59  
115.38  
57.95  
54.72  
51.01  
44.32  
41.07

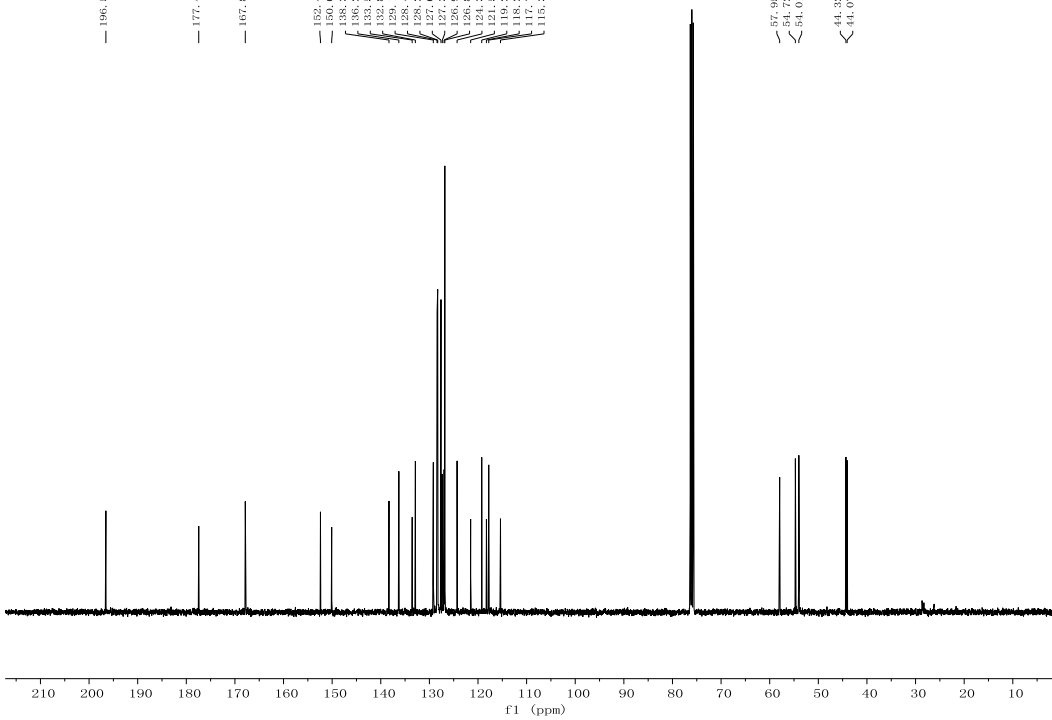





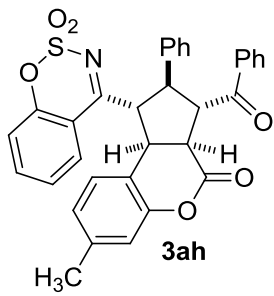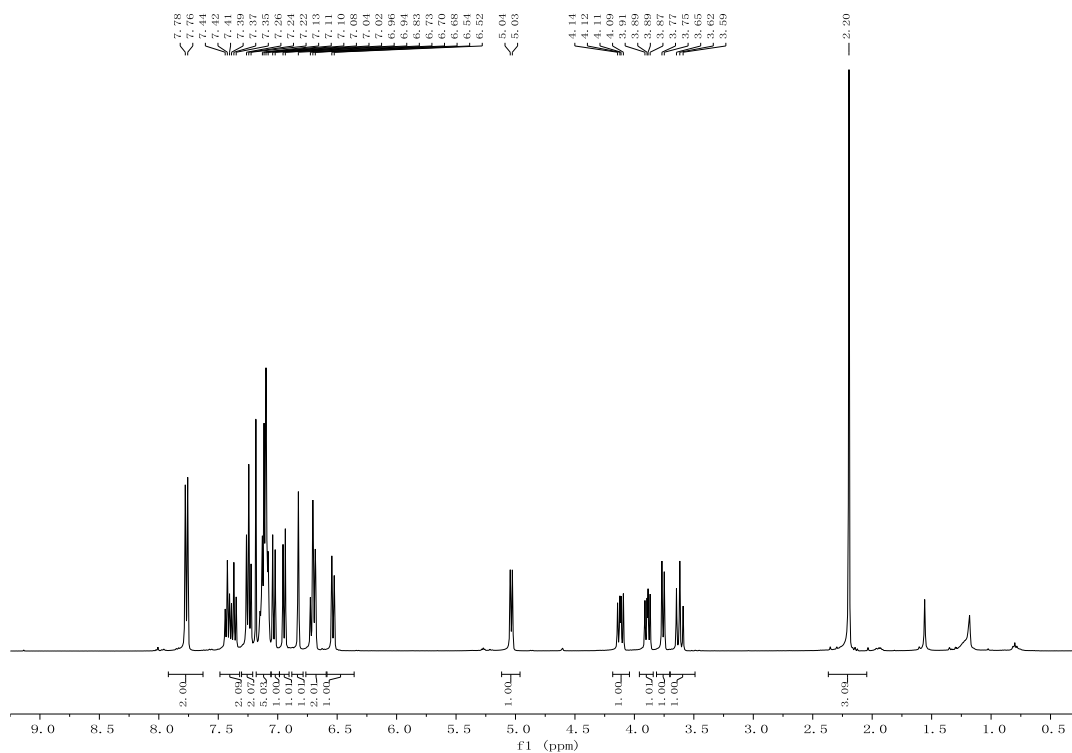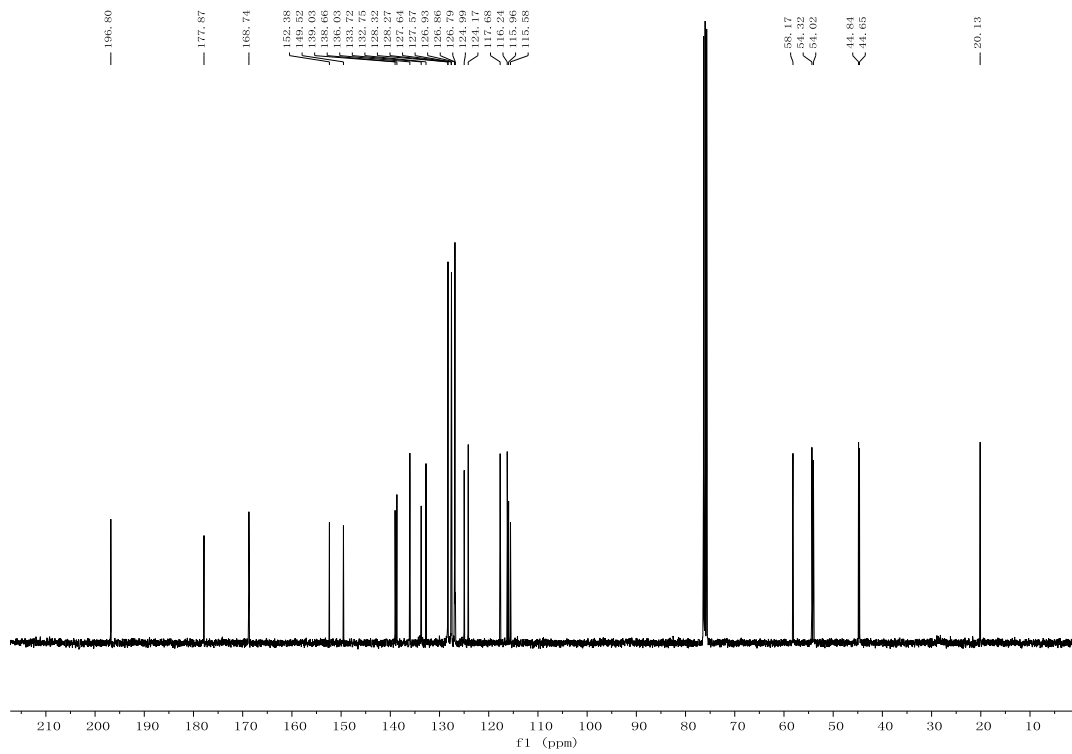



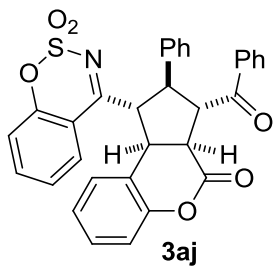

7.77  
7.75  
7.45  
7.43  
7.41  
7.39  
7.35  
7.35  
7.26  
7.23  
7.19  
7.14  
7.12  
7.10  
7.09  
7.07  
7.04  
7.02  
7.02  
6.88  
6.88  
6.86  
6.72  
6.70  
6.68  
6.54  
6.52  
5.05  
5.03

4.16  
4.14  
4.13  
3.93  
3.92  
3.91  
3.89  
3.79  
3.68  
3.65  
3.62

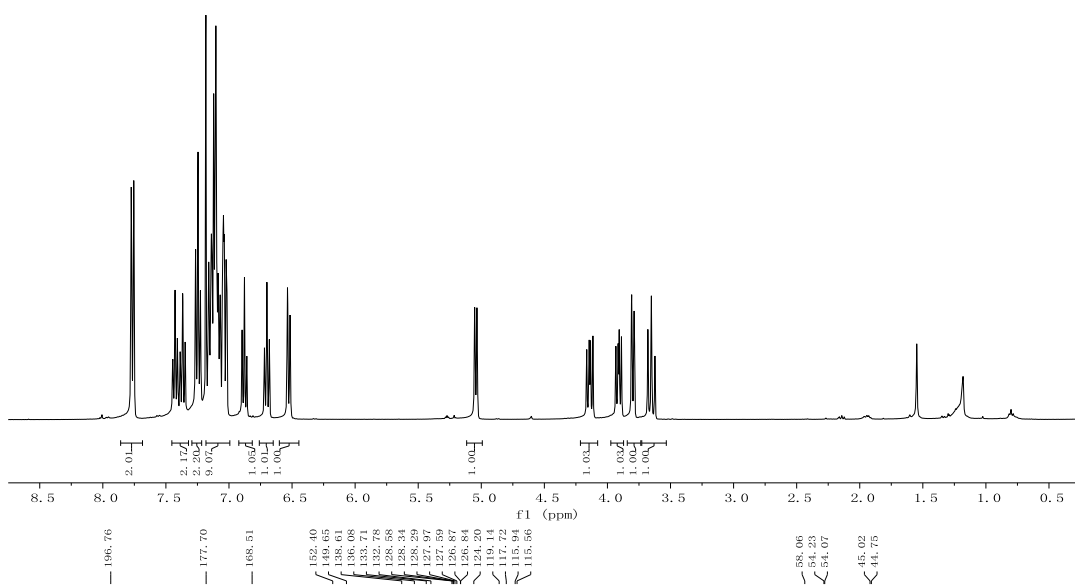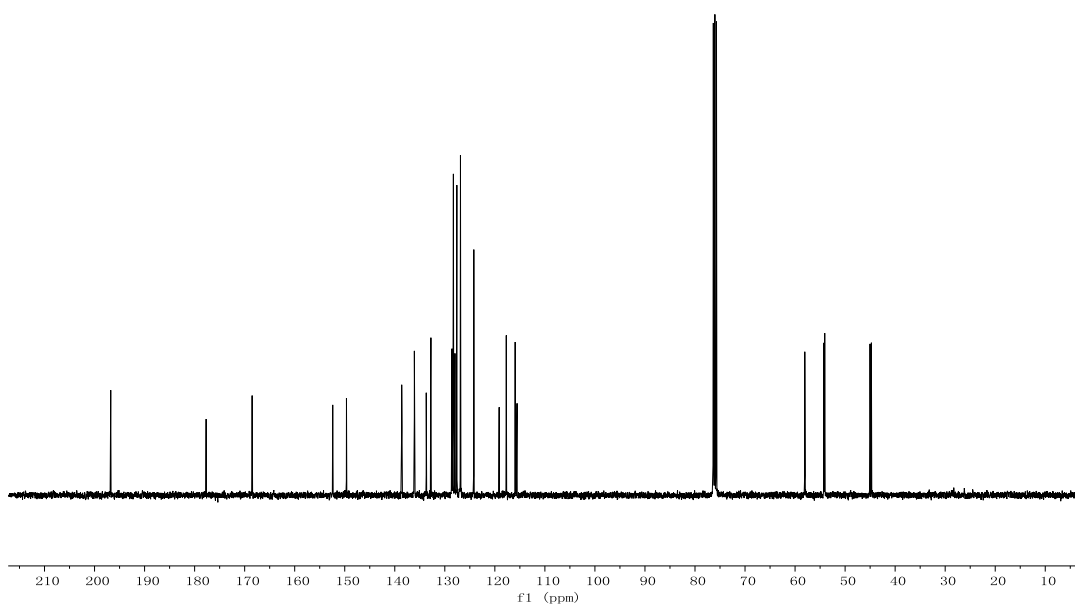





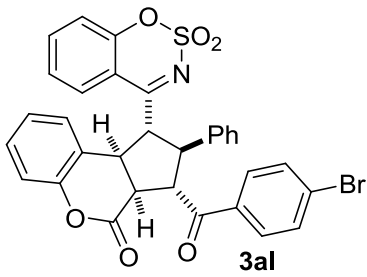

7.62  
7.60  
7.39  
7.37  
7.36  
7.16  
7.14  
7.11  
7.10  
7.05  
7.04  
7.02  
6.90  
6.86  
6.86  
6.73  
6.71  
6.69  
6.52  
4.98  
4.15  
4.13  
4.12  
4.10  
3.86  
3.86  
3.85  
3.83  
3.81  
3.68  
3.65  
3.62

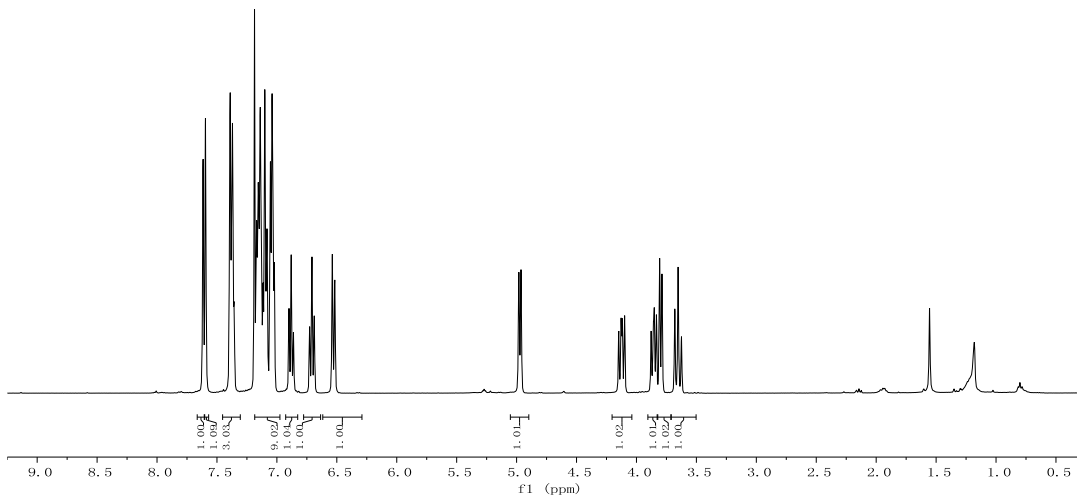

155.82  
177.55  
168.46  
159.38  
145.59  
138.35  
138.16  
132.42  
129.75  
128.64  
128.47  
128.22  
127.01  
127.01  
126.80  
124.26  
118.52  
117.75  
115.97  
115.52  
58.01  
54.24  
54.11  
45.09  
44.59

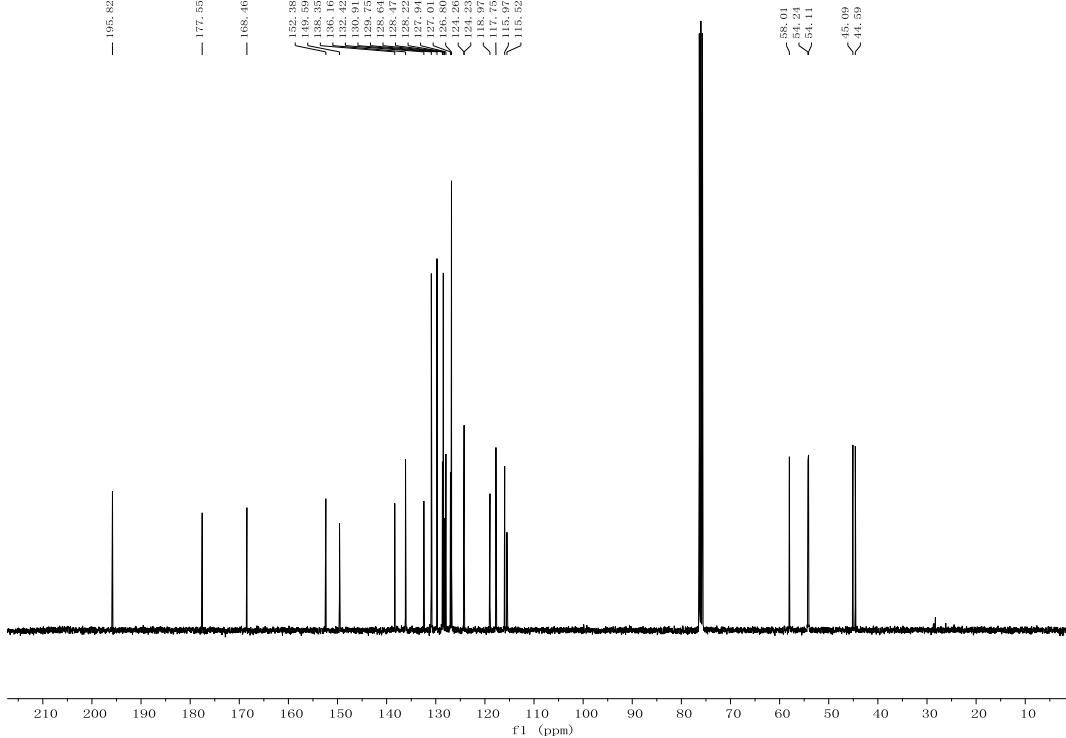

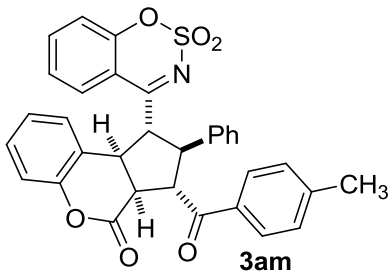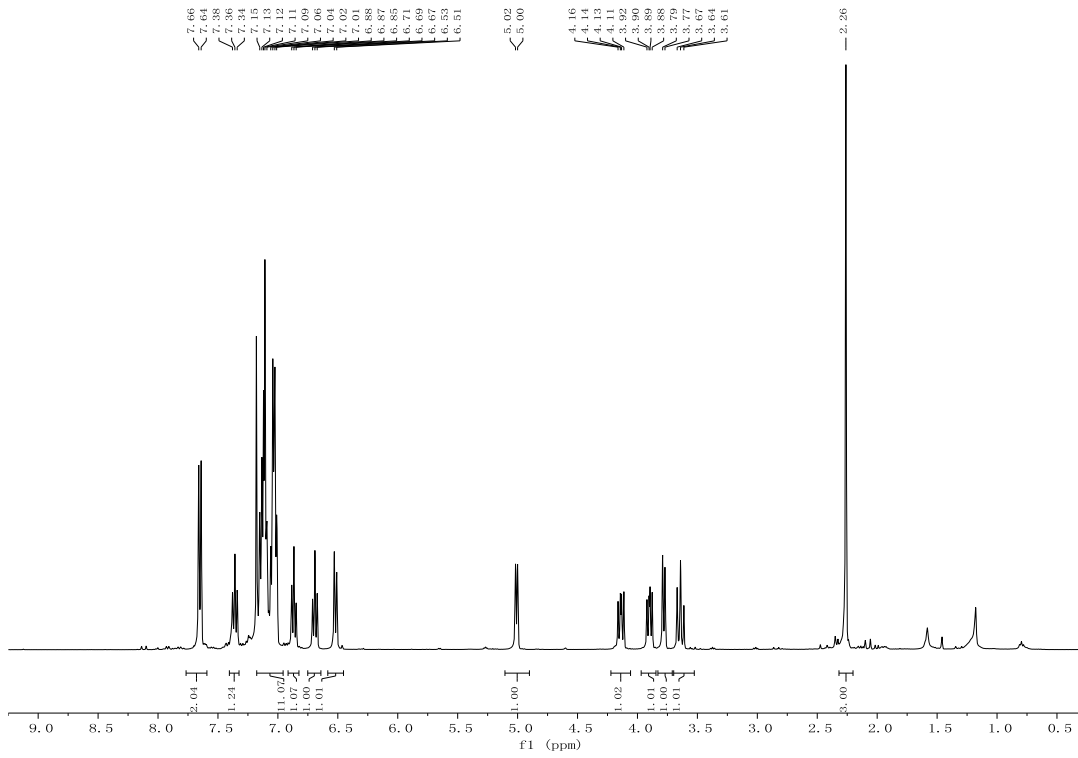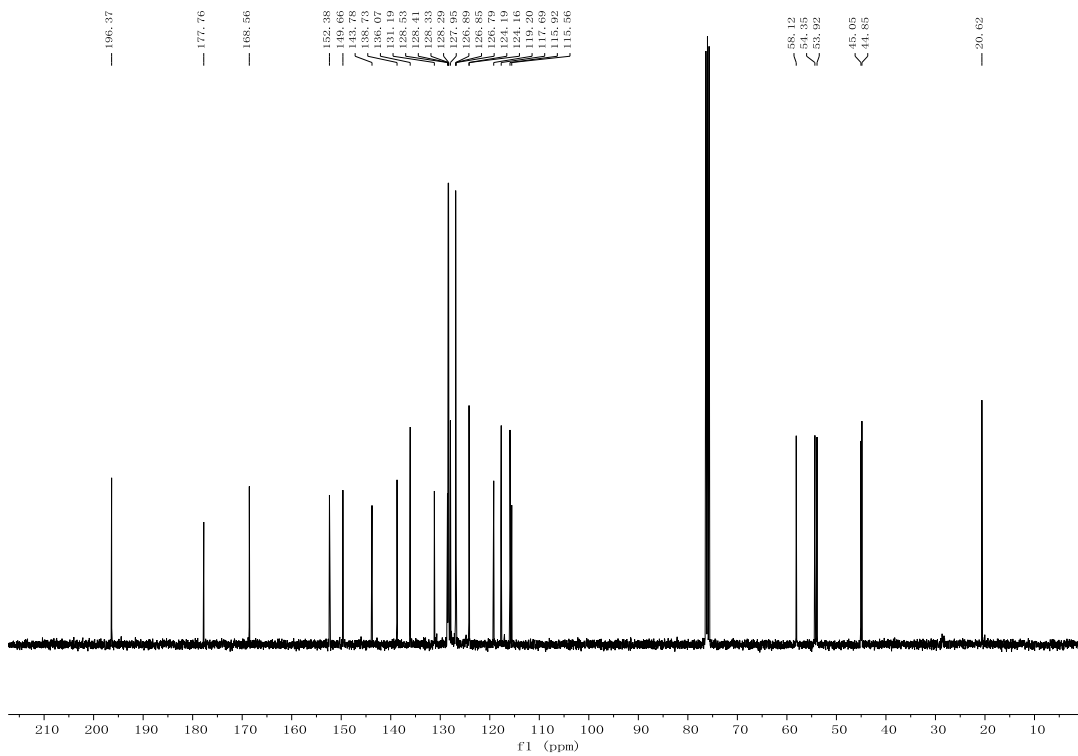

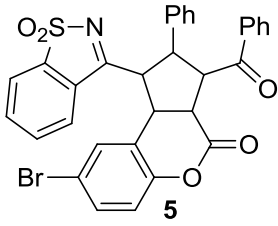

7.74  
7.72  
7.70  
7.68  
7.44  
7.43  
7.40  
7.29  
7.27  
7.26  
7.24  
7.22  
7.17  
7.16  
7.15  
7.08  
7.06  
6.92  
6.89  
6.21  
6.19

5.05  
5.03

4.22  
4.20  
4.19  
4.17  
3.80  
3.78  
3.77  
3.75  
3.47  
3.44  
3.41

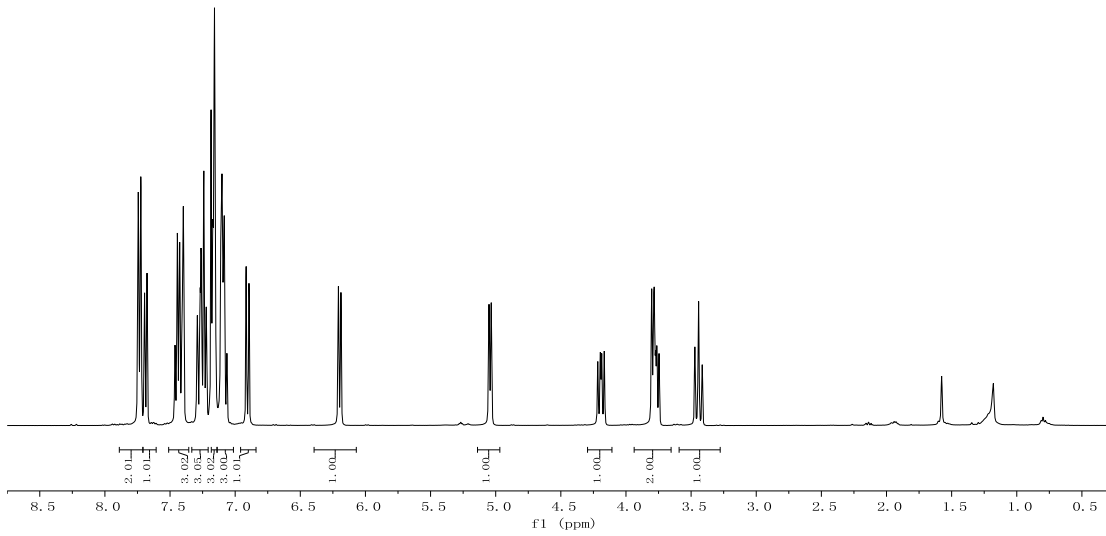

196.44  
173.72  
167.89  
148.75  
138.91  
138.71  
133.53  
132.89  
132.66  
132.55  
131.55  
131.46  
128.25  
128.45  
128.30  
128.10  
127.10  
127.07  
125.23  
121.47  
117.56  
117.56  
116.74

55.51  
54.48  
54.11  
44.46  
43.42

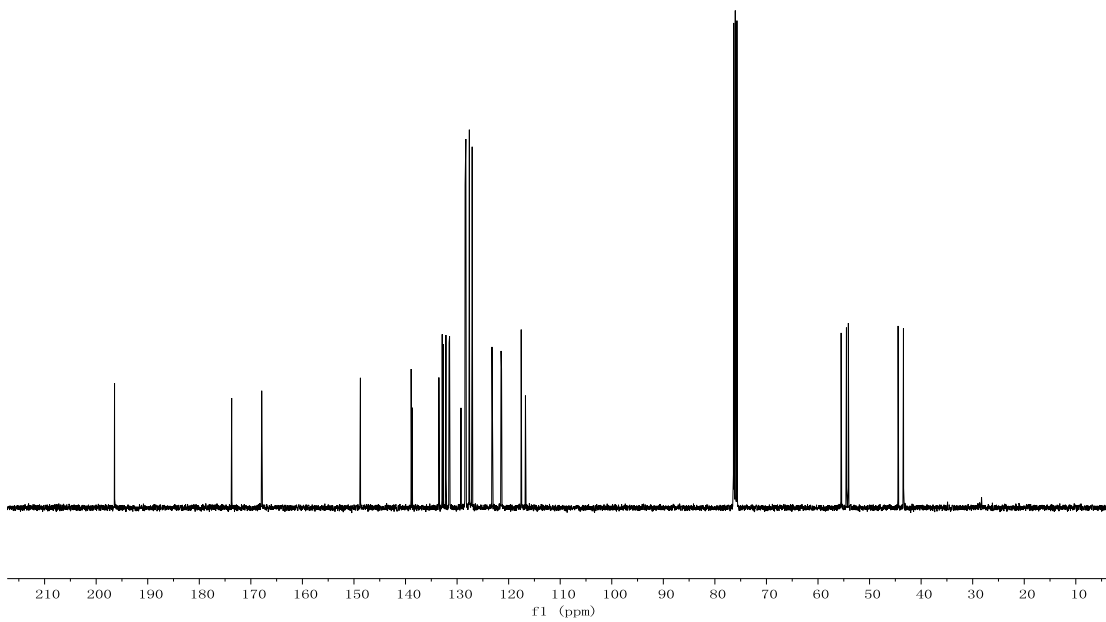

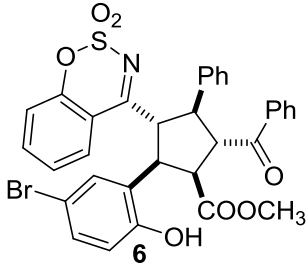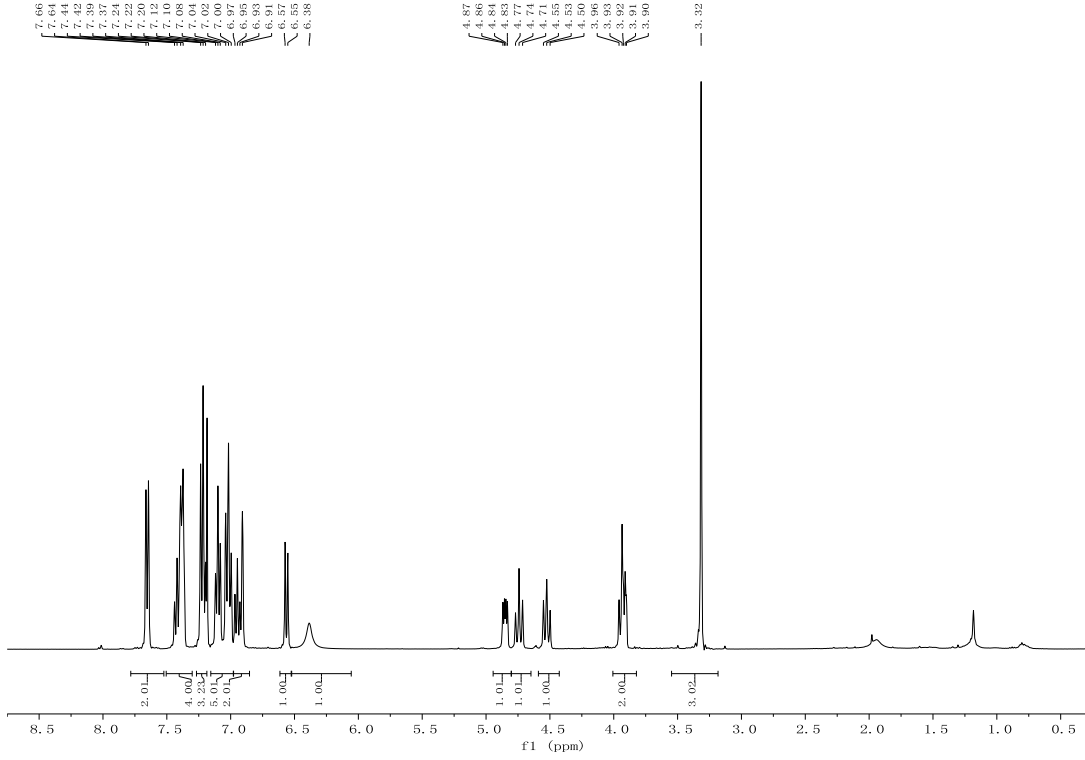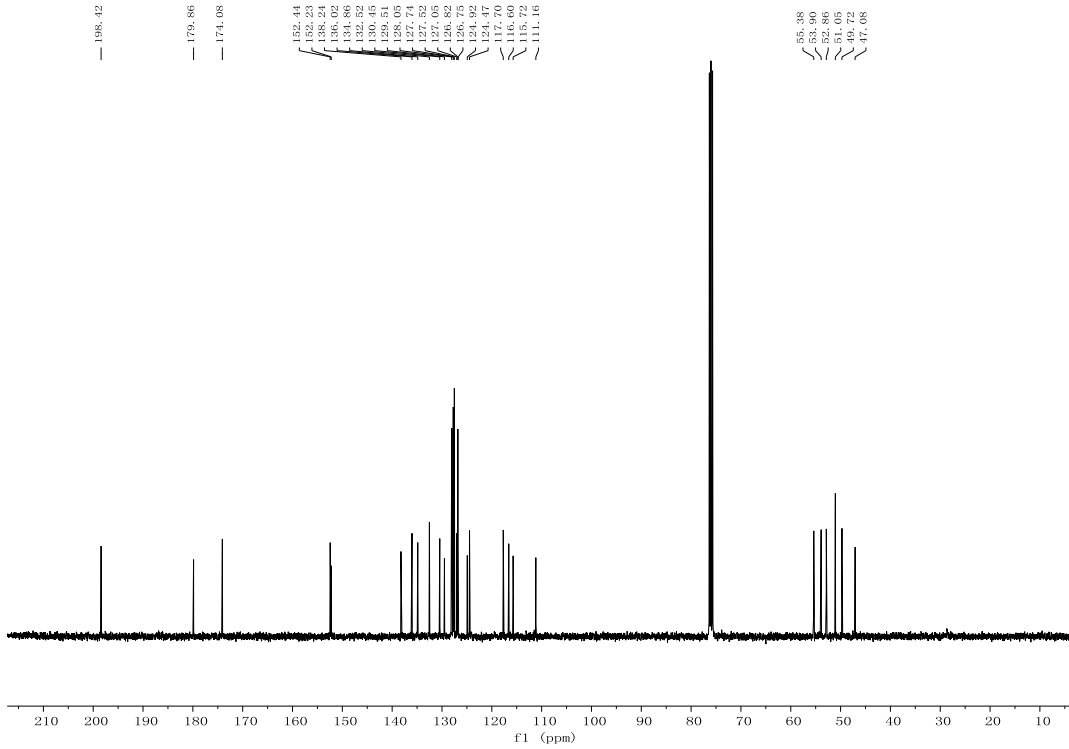

## X-Ray Crystallography Data

Crystallographic data for **3aj** have been deposited with the Cambridge Crystallographic Data Centre as deposition number CCDC 2073841. These data can be obtained free of charge via [www.ccdc.cam.ac.uk/data\\_request/cif](http://www.ccdc.cam.ac.uk/data_request/cif), or by emailing [data\\_request@ccdc.cam.ac.uk](mailto:data_request@ccdc.cam.ac.uk), or by contacting The Cambridge Crystallographic Data Centre, 12, Union Road, Cambridge CB2 1EZ, UK; fax: +44 1223 336033.

### X-Ray Crystallography Data of **3aj**

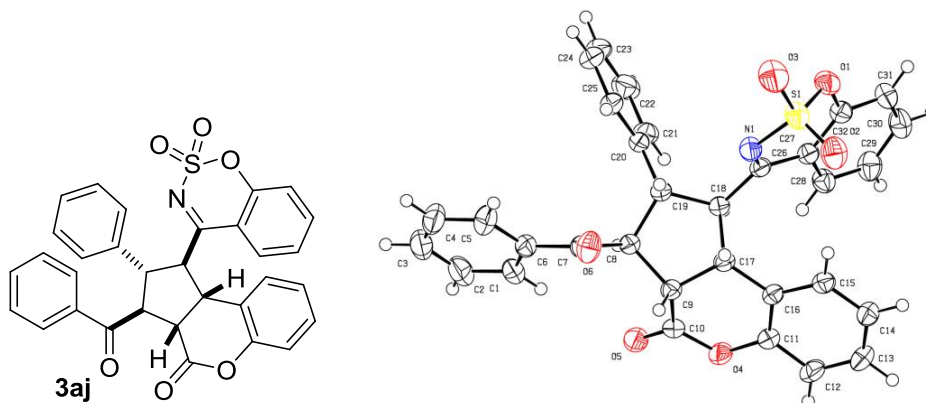

Table 1. Crystal data and structure refinement for **3aj**.

|                                 |                                                    |                  |
|---------------------------------|----------------------------------------------------|------------------|
| Identification code             | <b>3aj</b>                                         |                  |
| Empirical formula               | C <sub>32</sub> H <sub>23</sub> N O <sub>6</sub> S |                  |
| Formula weight                  | 549.57                                             |                  |
| Temperature                     | 193(2) K                                           |                  |
| Wavelength                      | 1.34139 Å                                          |                  |
| Crystal system                  | Triclinic                                          |                  |
| Space group                     | P-1                                                |                  |
| Unit cell dimensions            | a = 10.5537(10) Å                                  | α = 114.381(3)°. |
|                                 | b = 11.0474(11) Å                                  | β = 99.000(3)°.  |
|                                 | c = 13.2402(13) Å                                  | γ = 101.915(3)°. |
| Volume                          | 1324.2(2) Å <sup>3</sup>                           |                  |
| Z                               | 2                                                  |                  |
| Density (calculated)            | 1.378 Mg/m <sup>3</sup>                            |                  |
| Absorption coefficient          | 0.967 mm <sup>-1</sup>                             |                  |
| F(000)                          | 572                                                |                  |
| Crystal size                    | 0.160 x 0.120 x 0.110 mm <sup>3</sup>              |                  |
| Theta range for data collection | 3.312 to 52.989°.                                  |                  |
| Index ranges                    | -12 ≤ h ≤ 12, -13 ≤ k ≤ 13, -15 ≤ l ≤ 15           |                  |

|                                   |                                             |
|-----------------------------------|---------------------------------------------|
| Reflections collected             | 13998                                       |
| Independent reflections           | 4655 [R(int) = 0.0673]                      |
| Completeness to theta = 52.989°   | 99.2 %                                      |
| Refinement method                 | Full-matrix least-squares on F <sup>2</sup> |
| Data / restraints / parameters    | 4655 / 0 / 361                              |
| Goodness-of-fit on F <sup>2</sup> | 1.039                                       |
| Final R indices [I>2sigma(I)]     | R1 = 0.0758, wR2 = 0.2104                   |
| R indices (all data)              | R1 = 0.0793, wR2 = 0.2158                   |
| Extinction coefficient            | n/a                                         |
| Largest diff. peak and hole       | 0.382 and -0.502 e.Å <sup>-3</sup>          |

Table 2. Atomic coordinates ( x 10<sup>4</sup>) and equivalent isotropic displacement parameters (Å<sup>2</sup>x 10<sup>3</sup>) for **3aj**. U(eq) is defined as one third of the trace of the orthogonalized U<sup>ij</sup> tensor.

|       | x        | y       | z        | U(eq) |
|-------|----------|---------|----------|-------|
| C(1)  | -1134(2) | 1396(2) | 6040(2)  | 43(1) |
| C(2)  | -2256(3) | 578(3)  | 6134(2)  | 54(1) |
| C(3)  | -2099(3) | -105(3) | 6792(2)  | 54(1) |
| C(4)  | -825(3)  | 14(3)   | 7351(2)  | 56(1) |
| C(5)  | 291(3)   | 799(3)  | 7243(2)  | 49(1) |
| C(6)  | 139(2)   | 1508(2) | 6590(2)  | 36(1) |
| C(7)  | 1372(2)  | 2343(2) | 6486(2)  | 33(1) |
| C(8)  | 1387(2)  | 3694(2) | 6416(2)  | 29(1) |
| C(9)  | 1865(2)  | 3736(2) | 5371(2)  | 29(1) |
| C(10) | 728(2)   | 3712(2) | 4508(2)  | 32(1) |
| C(11) | 2303(2)  | 5260(2) | 4111(2)  | 33(1) |
| C(12) | 2459(2)  | 5776(3) | 3328(2)  | 43(1) |
| C(13) | 3683(3)  | 6700(3) | 3517(2)  | 45(1) |
| C(14) | 4731(2)  | 7101(2) | 4471(2)  | 38(1) |
| C(15) | 4558(2)  | 6558(2) | 5234(2)  | 33(1) |
| C(16) | 3327(2)  | 5631(2) | 5068(2)  | 29(1) |
| C(17) | 3113(2)  | 5019(2) | 5877(2)  | 28(1) |
| C(18) | 2926(2)  | 5986(2) | 7048(2)  | 27(1) |
| C(19) | 2455(2)  | 4929(2) | 7489(2)  | 29(1) |
| C(20) | 1977(2)  | 5481(2) | 8562(2)  | 33(1) |
| C(21) | 1100(2)  | 6293(2) | 8696(2)  | 40(1) |
| C(22) | 710(3)   | 6798(3) | 9707(2)  | 52(1) |
| C(23) | 1185(3)  | 6506(3) | 10591(2) | 58(1) |

|       |         |          |          |       |
|-------|---------|----------|----------|-------|
| C(24) | 2030(3) | 5695(3)  | 10458(2) | 55(1) |
| C(25) | 2433(2) | 5183(2)  | 9454(2)  | 42(1) |
| C(26) | 4239(2) | 7102(2)  | 7812(2)  | 29(1) |
| C(27) | 4464(2) | 8527(2)  | 7987(2)  | 31(1) |
| C(28) | 3596(2) | 8920(2)  | 7344(2)  | 36(1) |
| C(29) | 3863(2) | 10291(3) | 7547(2)  | 44(1) |
| C(30) | 4980(3) | 11296(2) | 8414(2)  | 47(1) |
| C(31) | 5852(2) | 10952(2) | 9060(2)  | 43(1) |
| C(32) | 5593(2) | 9574(2)  | 8826(2)  | 35(1) |
| N(1)  | 5139(2) | 6686(2)  | 8253(2)  | 35(1) |
| O(1)  | 6479(2) | 9251(2)  | 9507(1)  | 42(1) |
| O(2)  | 7350(2) | 7697(2)  | 8048(2)  | 52(1) |
| O(3)  | 7239(2) | 7502(2)  | 9809(2)  | 61(1) |
| O(4)  | 1025(2) | 4367(2)  | 3869(1)  | 39(1) |
| O(5)  | -431(2) | 3100(2)  | 4317(1)  | 44(1) |
| O(6)  | 2389(2) | 1992(2)  | 6493(2)  | 46(1) |
| S(1)  | 6667(1) | 7736(1)  | 8897(1)  | 40(1) |

Table 3. Bond lengths [Å] and angles [°] for **3aj**.

|            |          |
|------------|----------|
| C(1)-C(6)  | 1.379(3) |
| C(1)-C(2)  | 1.389(3) |
| C(1)-H(1)  | 0.9500   |
| C(2)-C(3)  | 1.380(4) |
| C(2)-H(2)  | 0.9500   |
| C(3)-C(4)  | 1.381(4) |
| C(3)-H(3)  | 0.9500   |
| C(4)-C(5)  | 1.377(3) |
| C(4)-H(4)  | 0.9500   |
| C(5)-C(6)  | 1.398(3) |
| C(5)-H(5)  | 0.9500   |
| C(6)-C(7)  | 1.492(3) |
| C(7)-O(6)  | 1.213(3) |
| C(7)-C(8)  | 1.531(3) |
| C(8)-C(19) | 1.554(3) |
| C(8)-C(9)  | 1.560(2) |
| C(8)-H(8)  | 1.0000   |
| C(9)-C(10) | 1.509(3) |



|             |          |
|-------------|----------|
| C(9)-C(17)  | 1.536(3) |
| C(9)-H(9)   | 1.0000   |
| C(10)-O(5)  | 1.200(3) |
| C(10)-O(4)  | 1.354(2) |
| C(11)-C(16) | 1.379(3) |
| C(11)-C(12) | 1.388(3) |
| C(11)-O(4)  | 1.397(2) |
| C(12)-C(13) | 1.384(3) |
| C(12)-H(12) | 0.9500   |
| C(13)-C(14) | 1.384(3) |
| C(13)-H(13) | 0.9500   |
| C(14)-C(15) | 1.388(3) |
| C(14)-H(14) | 0.9500   |
| C(15)-C(16) | 1.399(3) |
| C(15)-H(15) | 0.9500   |
| C(16)-C(17) | 1.506(2) |
| C(17)-C(18) | 1.549(2) |
| C(17)-H(17) | 1.0000   |
| C(18)-C(26) | 1.513(3) |
| C(18)-C(19) | 1.537(2) |
| C(18)-H(18) | 1.0000   |
| C(19)-C(20) | 1.511(3) |
| C(19)-H(19) | 1.0000   |
| C(20)-C(25) | 1.394(3) |
| C(20)-C(21) | 1.399(3) |
| C(21)-C(22) | 1.386(3) |
| C(21)-H(21) | 0.9500   |
| C(22)-C(23) | 1.386(4) |
| C(22)-H(22) | 0.9500   |
| C(23)-C(24) | 1.370(5) |
| C(23)-H(23) | 0.9500   |
| C(24)-C(25) | 1.387(3) |
| C(24)-H(24) | 0.9500   |
| C(25)-H(25) | 0.9500   |
| C(26)-N(1)  | 1.297(3) |
| C(26)-C(27) | 1.455(3) |
| C(27)-C(32) | 1.395(3) |
| C(27)-C(28) | 1.406(3) |

|                 |            |
|-----------------|------------|
| C(28)-C(29)     | 1.382(3)   |
| C(28)-H(28)     | 0.9500     |
| C(29)-C(30)     | 1.387(4)   |
| C(29)-H(29)     | 0.9500     |
| C(30)-C(31)     | 1.374(3)   |
| C(30)-H(30)     | 0.9500     |
| C(31)-C(32)     | 1.379(3)   |
| C(31)-H(31)     | 0.9500     |
| C(32)-O(1)      | 1.398(3)   |
| N(1)-S(1)       | 1.6291(17) |
| O(1)-S(1)       | 1.6013(18) |
| O(2)-S(1)       | 1.4185(18) |
| O(3)-S(1)       | 1.4089(18) |
| C(6)-C(1)-C(2)  | 120.0(2)   |
| C(6)-C(1)-H(1)  | 120.0      |
| C(2)-C(1)-H(1)  | 120.0      |
| C(3)-C(2)-C(1)  | 120.1(3)   |
| C(3)-C(2)-H(2)  | 119.9      |
| C(1)-C(2)-H(2)  | 119.9      |
| C(4)-C(3)-C(2)  | 120.0(2)   |
| C(4)-C(3)-H(3)  | 120.0      |
| C(2)-C(3)-H(3)  | 120.0      |
| C(5)-C(4)-C(3)  | 120.2(3)   |
| C(5)-C(4)-H(4)  | 119.9      |
| C(3)-C(4)-H(4)  | 119.9      |
| C(4)-C(5)-C(6)  | 120.1(3)   |
| C(4)-C(5)-H(5)  | 120.0      |
| C(6)-C(5)-H(5)  | 120.0      |
| C(1)-C(6)-C(5)  | 119.6(2)   |
| C(1)-C(6)-C(7)  | 121.87(19) |
| C(5)-C(6)-C(7)  | 118.5(2)   |
| O(6)-C(7)-C(6)  | 121.08(19) |
| O(6)-C(7)-C(8)  | 118.85(18) |
| C(6)-C(7)-C(8)  | 120.03(18) |
| C(7)-C(8)-C(19) | 108.64(15) |
| C(7)-C(8)-C(9)  | 112.58(16) |
| C(19)-C(8)-C(9) | 104.40(15) |
| C(7)-C(8)-H(8)  | 110.4      |

|                   |            |
|-------------------|------------|
| C(19)-C(8)-H(8)   | 110.4      |
| C(9)-C(8)-H(8)    | 110.4      |
| C(10)-C(9)-C(17)  | 115.25(16) |
| C(10)-C(9)-C(8)   | 110.55(16) |
| C(17)-C(9)-C(8)   | 106.26(15) |
| C(10)-C(9)-H(9)   | 108.2      |
| C(17)-C(9)-H(9)   | 108.2      |
| C(8)-C(9)-H(9)    | 108.2      |
| O(5)-C(10)-O(4)   | 117.17(18) |
| O(5)-C(10)-C(9)   | 124.03(18) |
| O(4)-C(10)-C(9)   | 118.74(17) |
| C(16)-C(11)-C(12) | 122.3(2)   |
| C(16)-C(11)-O(4)  | 122.73(17) |
| C(12)-C(11)-O(4)  | 114.94(19) |
| C(13)-C(12)-C(11) | 118.9(2)   |
| C(13)-C(12)-H(12) | 120.6      |
| C(11)-C(12)-H(12) | 120.6      |
| C(14)-C(13)-C(12) | 120.4(2)   |
| C(14)-C(13)-H(13) | 119.8      |
| C(12)-C(13)-H(13) | 119.8      |
| C(13)-C(14)-C(15) | 119.7(2)   |
| C(13)-C(14)-H(14) | 120.1      |
| C(15)-C(14)-H(14) | 120.1      |
| C(14)-C(15)-C(16) | 121.0(2)   |
| C(14)-C(15)-H(15) | 119.5      |
| C(16)-C(15)-H(15) | 119.5      |
| C(11)-C(16)-C(15) | 117.66(18) |
| C(11)-C(16)-C(17) | 120.13(18) |
| C(15)-C(16)-C(17) | 122.20(18) |
| C(16)-C(17)-C(9)  | 113.56(15) |
| C(16)-C(17)-C(18) | 116.83(16) |
| C(9)-C(17)-C(18)  | 103.61(14) |
| C(16)-C(17)-H(17) | 107.5      |
| C(9)-C(17)-H(17)  | 107.5      |
| C(18)-C(17)-H(17) | 107.5      |
| C(26)-C(18)-C(19) | 113.70(15) |
| C(26)-C(18)-C(17) | 110.40(15) |
| C(19)-C(18)-C(17) | 100.76(14) |

|                   |            |
|-------------------|------------|
| C(26)-C(18)-H(18) | 110.5      |
| C(19)-C(18)-H(18) | 110.5      |
| C(17)-C(18)-H(18) | 110.5      |
| C(20)-C(19)-C(18) | 115.61(16) |
| C(20)-C(19)-C(8)  | 114.84(15) |
| C(18)-C(19)-C(8)  | 103.32(14) |
| C(20)-C(19)-H(19) | 107.5      |
| C(18)-C(19)-H(19) | 107.5      |
| C(8)-C(19)-H(19)  | 107.5      |
| C(25)-C(20)-C(21) | 118.9(2)   |
| C(25)-C(20)-C(19) | 119.0(2)   |
| C(21)-C(20)-C(19) | 122.14(18) |
| C(22)-C(21)-C(20) | 120.0(2)   |
| C(22)-C(21)-H(21) | 120.0      |
| C(20)-C(21)-H(21) | 120.0      |
| C(21)-C(22)-C(23) | 120.5(3)   |
| C(21)-C(22)-H(22) | 119.7      |
| C(23)-C(22)-H(22) | 119.7      |
| C(24)-C(23)-C(22) | 119.7(2)   |
| C(24)-C(23)-H(23) | 120.1      |
| C(22)-C(23)-H(23) | 120.1      |
| C(23)-C(24)-C(25) | 120.6(2)   |
| C(23)-C(24)-H(24) | 119.7      |
| C(25)-C(24)-H(24) | 119.7      |
| C(24)-C(25)-C(20) | 120.3(2)   |
| C(24)-C(25)-H(25) | 119.9      |
| C(20)-C(25)-H(25) | 119.9      |
| N(1)-C(26)-C(27)  | 123.46(18) |
| N(1)-C(26)-C(18)  | 115.61(18) |
| C(27)-C(26)-C(18) | 120.88(17) |
| C(32)-C(27)-C(28) | 117.23(19) |
| C(32)-C(27)-C(26) | 119.51(18) |
| C(28)-C(27)-C(26) | 123.26(18) |
| C(29)-C(28)-C(27) | 120.7(2)   |
| C(29)-C(28)-H(28) | 119.7      |
| C(27)-C(28)-H(28) | 119.7      |
| C(28)-C(29)-C(30) | 119.7(2)   |
| C(28)-C(29)-H(29) | 120.2      |

|                   |            |
|-------------------|------------|
| C(30)-C(29)-H(29) | 120.2      |
| C(31)-C(30)-C(29) | 121.3(2)   |
| C(31)-C(30)-H(30) | 119.4      |
| C(29)-C(30)-H(30) | 119.4      |
| C(30)-C(31)-C(32) | 118.4(2)   |
| C(30)-C(31)-H(31) | 120.8      |
| C(32)-C(31)-H(31) | 120.8      |
| C(31)-C(32)-C(27) | 122.7(2)   |
| C(31)-C(32)-O(1)  | 117.38(19) |
| C(27)-C(32)-O(1)  | 119.84(19) |
| C(26)-N(1)-S(1)   | 119.18(15) |
| C(32)-O(1)-S(1)   | 116.12(13) |
| C(10)-O(4)-C(11)  | 122.36(16) |
| O(3)-S(1)-O(2)    | 119.90(12) |
| O(3)-S(1)-O(1)    | 105.02(11) |
| O(2)-S(1)-O(1)    | 108.18(10) |
| O(3)-S(1)-N(1)    | 109.64(10) |
| O(2)-S(1)-N(1)    | 108.61(10) |
| O(1)-S(1)-N(1)    | 104.36(9)  |

---

Symmetry transformations used to generate equivalent atoms:

Table 4. Anisotropic displacement parameters ( $\text{\AA}^2 \times 10^3$ ) for **3aj**. The anisotropic displacement factor exponent takes the form:  $-2\pi^2 [ h^2 a^{*2} U^{11} + \dots + 2 h k a^* b^* U^{12} ]$

---

|       | $U^{11}$ | $U^{22}$ | $U^{33}$ | $U^{23}$ | $U^{13}$ | $U^{12}$ |
|-------|----------|----------|----------|----------|----------|----------|
| C(1)  | 45(1)    | 32(1)    | 42(1)    | 16(1)    | 5(1)     | 1(1)     |
| C(2)  | 43(1)    | 42(1)    | 60(2)    | 17(1)    | 8(1)     | -1(1)    |
| C(3)  | 58(2)    | 36(1)    | 60(2)    | 17(1)    | 28(1)    | 3(1)     |
| C(4)  | 72(2)    | 49(1)    | 60(2)    | 35(1)    | 29(1)    | 13(1)    |
| C(5)  | 55(2)    | 48(1)    | 58(1)    | 35(1)    | 23(1)    | 16(1)    |
| C(6)  | 43(1)    | 28(1)    | 34(1)    | 13(1)    | 15(1)    | 8(1)     |
| C(7)  | 37(1)    | 32(1)    | 32(1)    | 16(1)    | 9(1)     | 10(1)    |
| C(8)  | 32(1)    | 28(1)    | 26(1)    | 13(1)    | 7(1)     | 8(1)     |
| C(9)  | 33(1)    | 28(1)    | 26(1)    | 13(1)    | 6(1)     | 9(1)     |
| C(10) | 35(1)    | 32(1)    | 24(1)    | 11(1)    | 5(1)     | 6(1)     |
| C(11) | 37(1)    | 33(1)    | 27(1)    | 14(1)    | 9(1)     | 8(1)     |
| C(12) | 48(1)    | 54(1)    | 31(1)    | 26(1)    | 8(1)     | 10(1)    |

|       |       |       |       |       |        |        |
|-------|-------|-------|-------|-------|--------|--------|
| C(13) | 56(1) | 51(1) | 38(1) | 29(1) | 18(1)  | 14(1)  |
| C(14) | 42(1) | 38(1) | 37(1) | 19(1) | 16(1)  | 9(1)   |
| C(15) | 36(1) | 35(1) | 29(1) | 13(1) | 10(1)  | 11(1)  |
| C(16) | 32(1) | 31(1) | 26(1) | 14(1) | 10(1)  | 11(1)  |
| C(17) | 28(1) | 31(1) | 25(1) | 14(1) | 6(1)   | 9(1)   |
| C(18) | 28(1) | 28(1) | 24(1) | 12(1) | 6(1)   | 7(1)   |
| C(19) | 29(1) | 31(1) | 25(1) | 14(1) | 4(1)   | 7(1)   |
| C(20) | 31(1) | 34(1) | 25(1) | 13(1) | 4(1)   | -1(1)  |
| C(21) | 35(1) | 43(1) | 31(1) | 10(1) | 8(1)   | 4(1)   |
| C(22) | 46(1) | 48(1) | 42(1) | 5(1)  | 16(1)  | 3(1)   |
| C(23) | 62(2) | 55(2) | 29(1) | 6(1)  | 17(1)  | -12(1) |
| C(24) | 63(2) | 58(2) | 29(1) | 20(1) | 9(1)   | -7(1)  |
| C(25) | 46(1) | 45(1) | 31(1) | 21(1) | 5(1)   | 2(1)   |
| C(26) | 29(1) | 34(1) | 24(1) | 14(1) | 6(1)   | 7(1)   |
| C(27) | 31(1) | 32(1) | 28(1) | 14(1) | 8(1)   | 8(1)   |
| C(28) | 33(1) | 34(1) | 38(1) | 18(1) | 4(1)   | 8(1)   |
| C(29) | 42(1) | 43(1) | 57(1) | 31(1) | 13(1)  | 16(1)  |
| C(30) | 50(1) | 32(1) | 59(1) | 22(1) | 17(1)  | 10(1)  |
| C(31) | 41(1) | 34(1) | 43(1) | 15(1) | 9(1)   | 1(1)   |
| C(32) | 33(1) | 37(1) | 31(1) | 15(1) | 7(1)   | 6(1)   |
| N(1)  | 31(1) | 37(1) | 37(1) | 21(1) | 2(1)   | 7(1)   |
| O(1)  | 35(1) | 43(1) | 36(1) | 17(1) | -4(1)  | 3(1)   |
| O(2)  | 38(1) | 55(1) | 68(1) | 30(1) | 20(1)  | 13(1)  |
| O(3)  | 44(1) | 68(1) | 66(1) | 41(1) | -14(1) | 7(1)   |
| O(4)  | 36(1) | 48(1) | 30(1) | 22(1) | 1(1)   | 4(1)   |
| O(5)  | 33(1) | 54(1) | 37(1) | 24(1) | -1(1)  | 0(1)   |
| O(6)  | 47(1) | 47(1) | 65(1) | 37(1) | 24(1)  | 23(1)  |
| S(1)  | 28(1) | 44(1) | 47(1) | 25(1) | 0(1)   | 6(1)   |

Table 5. Hydrogen coordinates ( $\times 10^4$ ) and isotropic displacement parameters ( $\text{\AA}^2 \times 10^3$ ) for **3aj**.

|      | x     | y    | z    | U(eq) |
|------|-------|------|------|-------|
| H(1) | -1245 | 1877 | 5597 | 51    |
| H(2) | -3132 | 490  | 5745 | 64    |
| H(3) | -2868 | -657 | 6861 | 65    |
| H(4) | -719  | -448 | 7811 | 67    |

|       |      |       |       |    |
|-------|------|-------|-------|----|
| H(5)  | 1166 | 860   | 7612  | 59 |
| H(8)  | 478  | 3834  | 6385  | 35 |
| H(9)  | 2147 | 2886  | 4985  | 35 |
| H(12) | 1738 | 5499  | 2673  | 52 |
| H(13) | 3805 | 7060  | 2988  | 54 |
| H(14) | 5566 | 7744  | 4604  | 46 |
| H(15) | 5285 | 6820  | 5880  | 40 |
| H(17) | 3915 | 4715  | 6044  | 34 |
| H(18) | 2208 | 6418  | 6929  | 33 |
| H(19) | 3232 | 4595  | 7665  | 34 |
| H(21) | 771  | 6499  | 8094  | 48 |
| H(22) | 114  | 7348  | 9795  | 63 |
| H(23) | 926  | 6866  | 11286 | 69 |
| H(24) | 2343 | 5482  | 11059 | 66 |
| H(25) | 3024 | 4626  | 9373  | 51 |
| H(28) | 2818 | 8235  | 6763  | 43 |
| H(29) | 3284 | 10544 | 7096  | 53 |
| H(30) | 5146 | 12241 | 8564  | 56 |
| H(31) | 6614 | 11646 | 9653  | 51 |

---

Table 6. Torsion angles [°] for **3aj**.

---
